# Supplementary material for: Comprehensive analysis of Verticillium nonalfalfae in silico secretome uncovers putative effector proteins expressed during hop invasion
Source: PubMed Central journal article supplement (PMC5997321; doi:10.1371/journal.pone.0198971), 2018-06-12

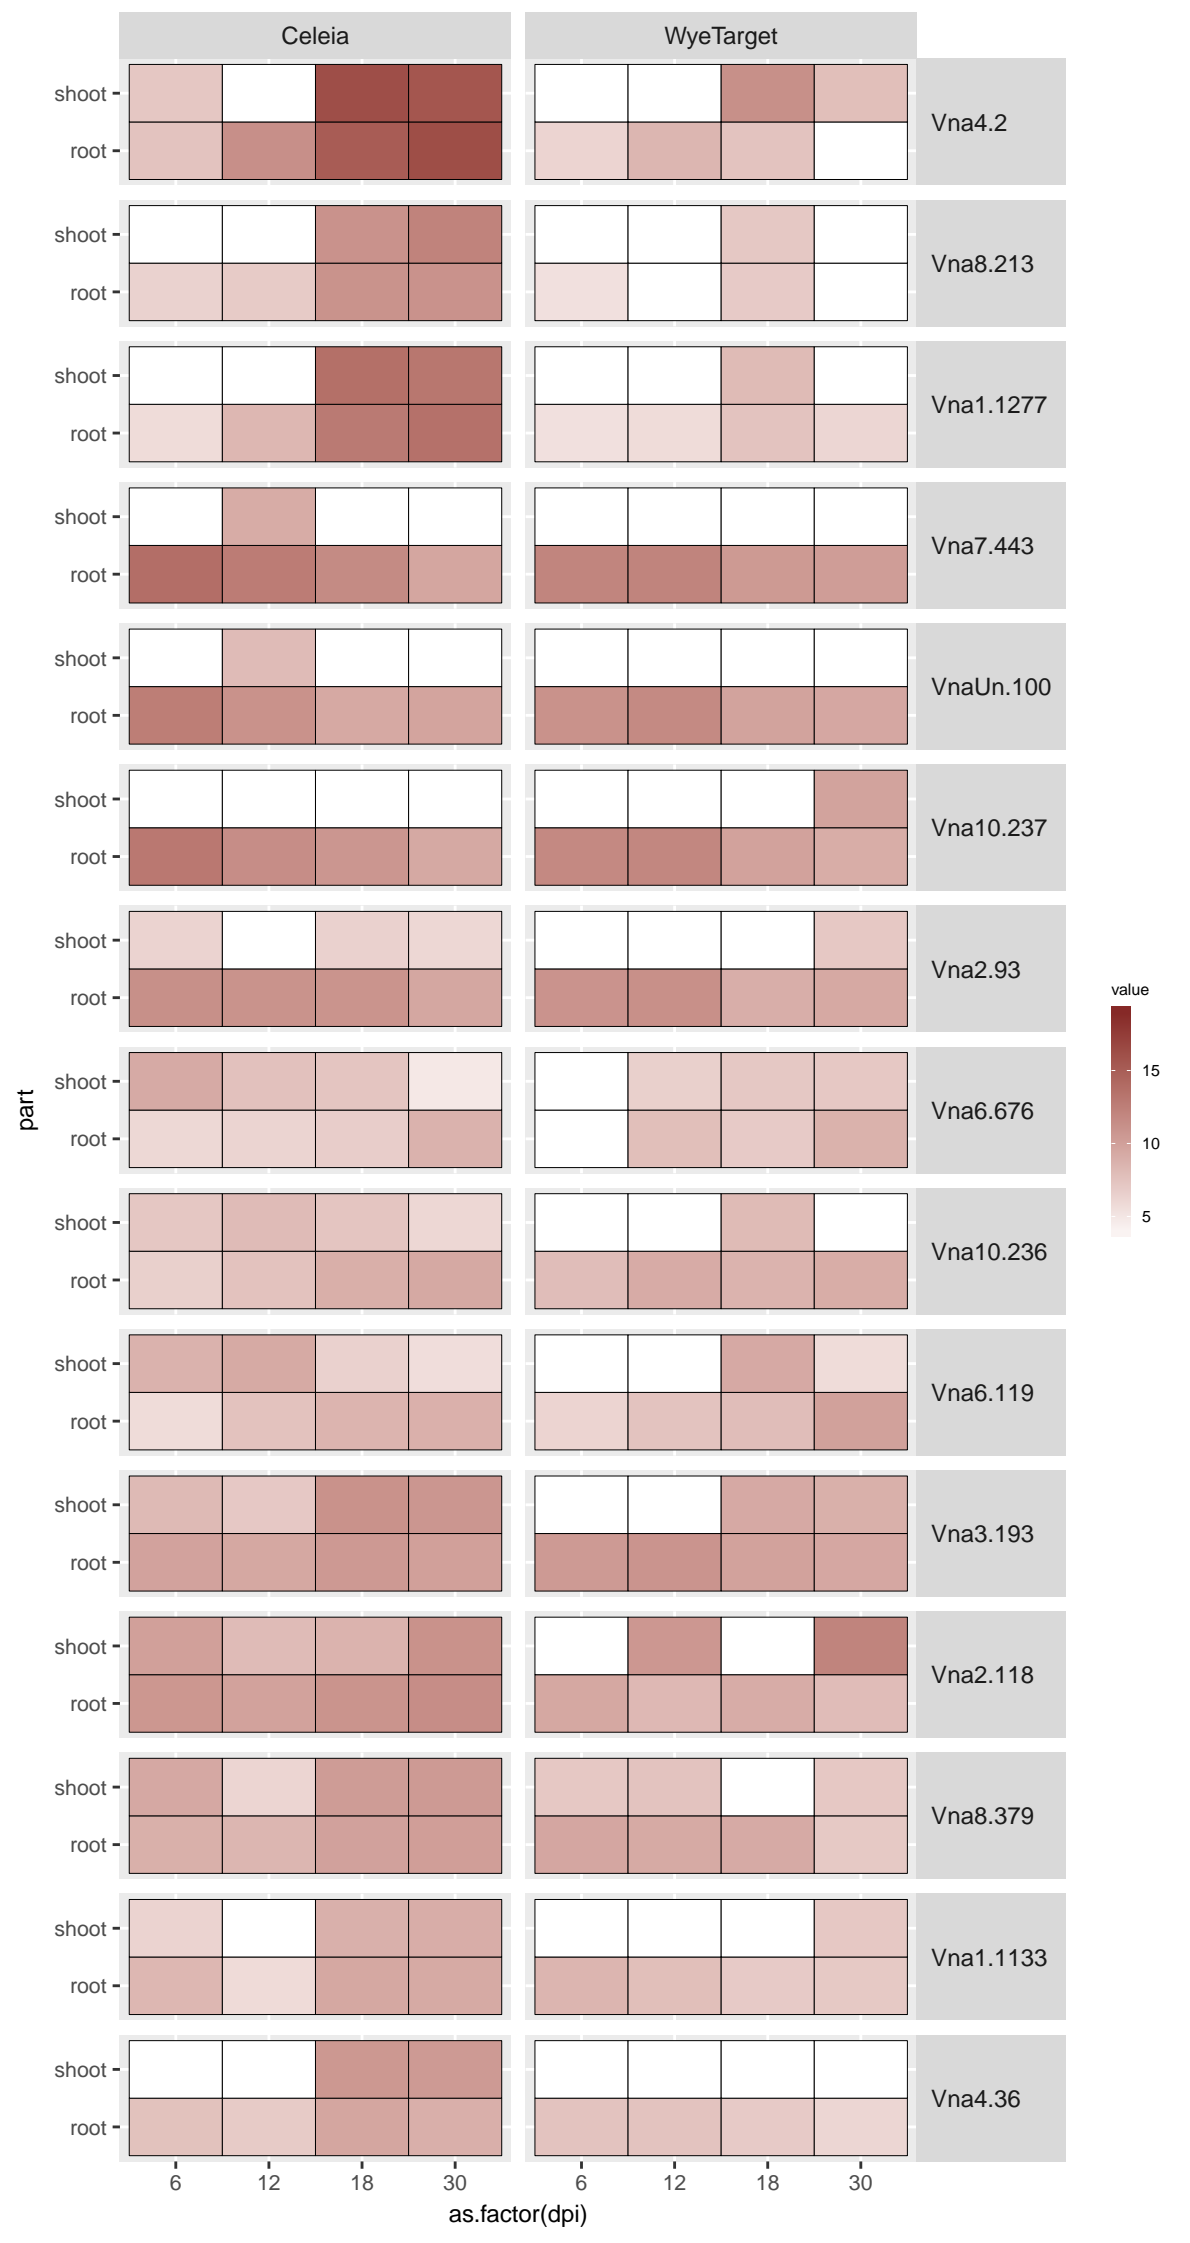

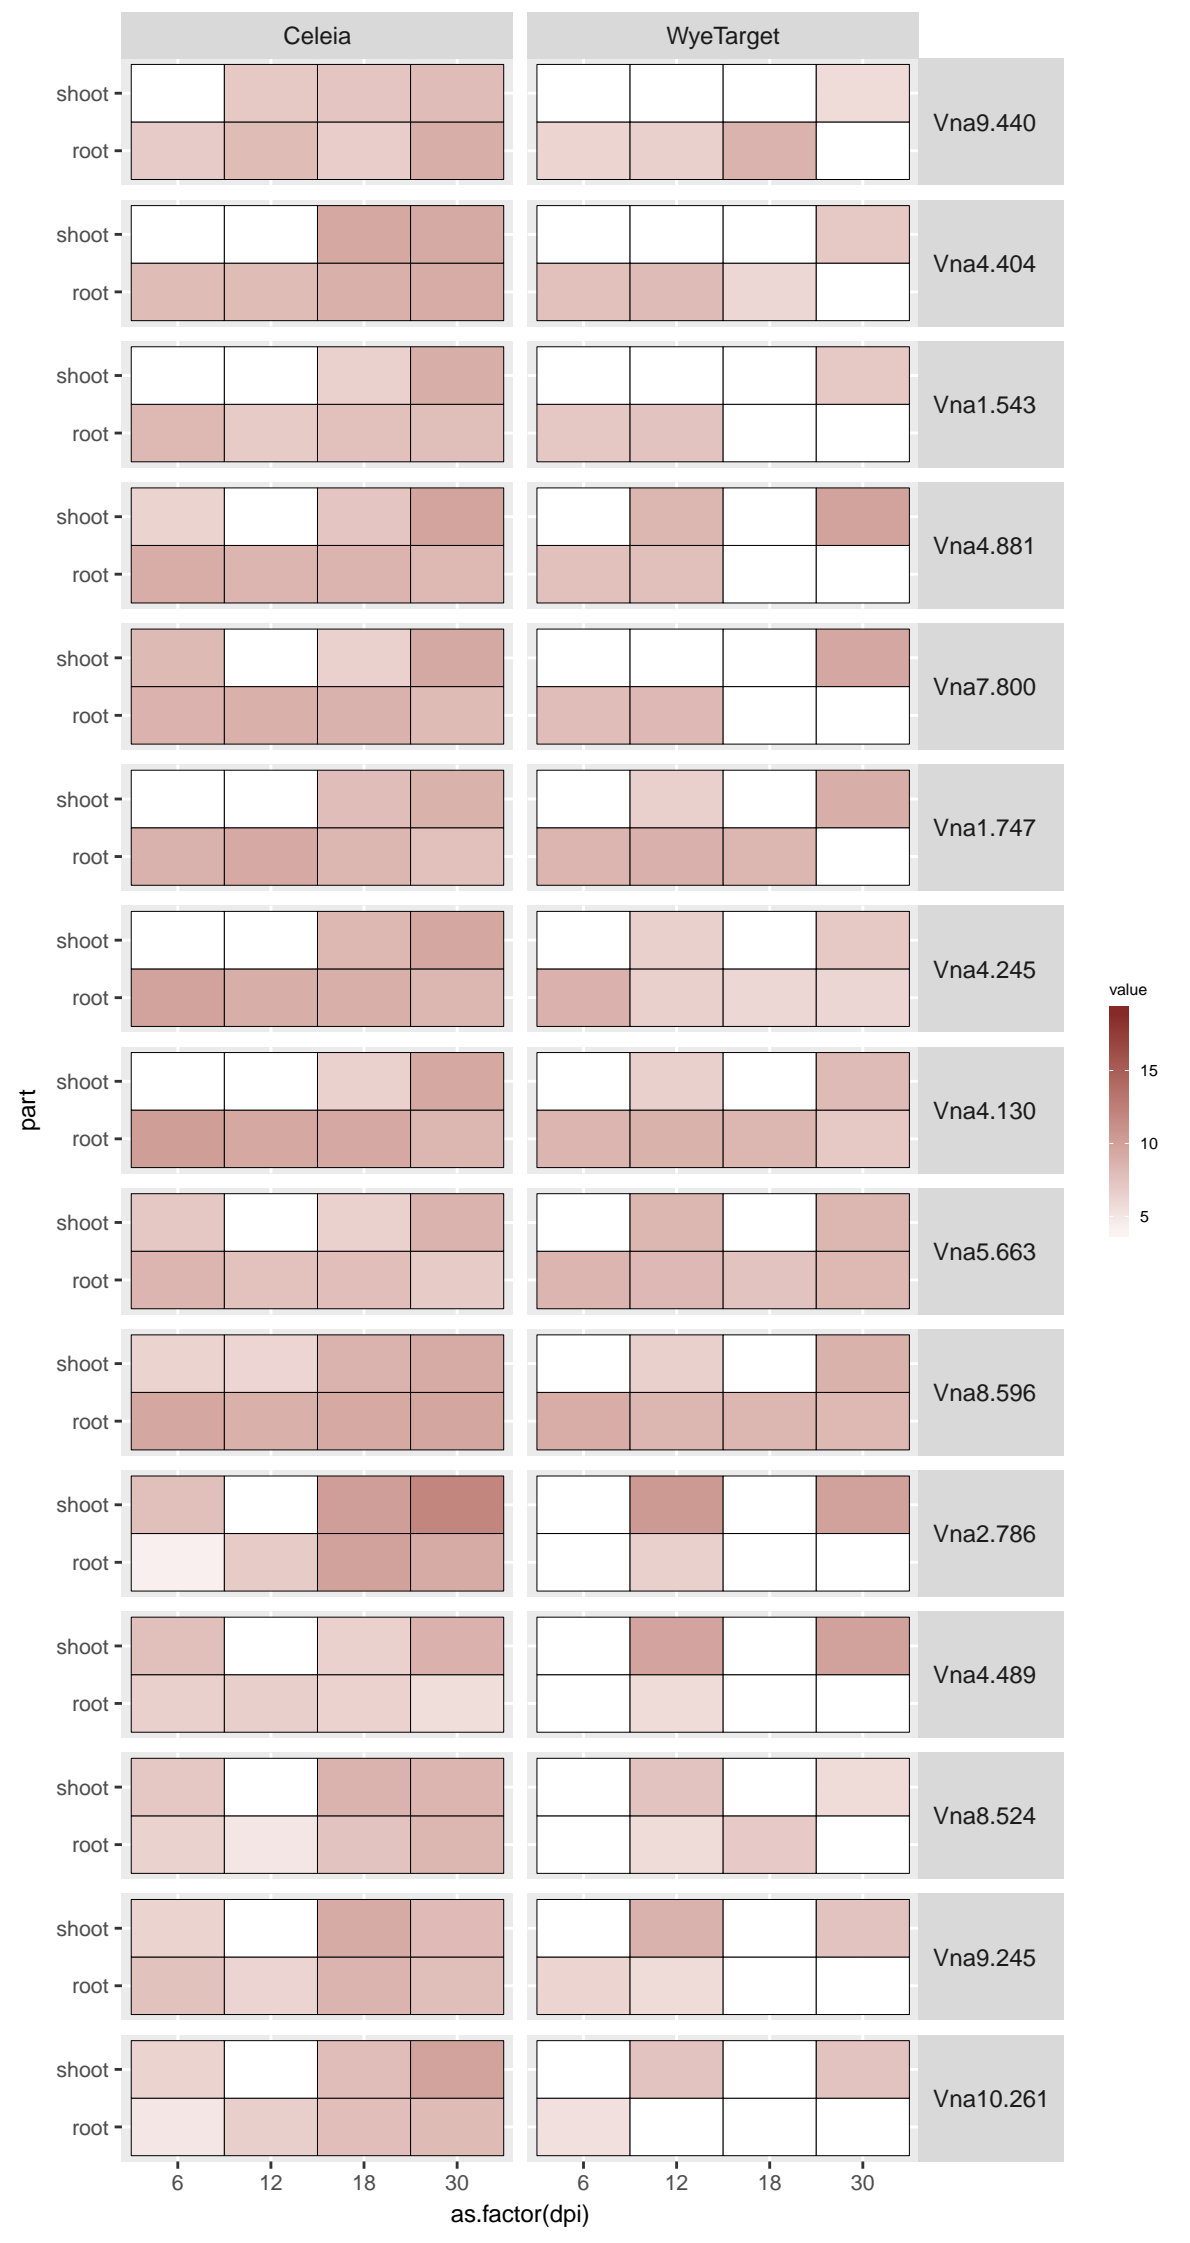

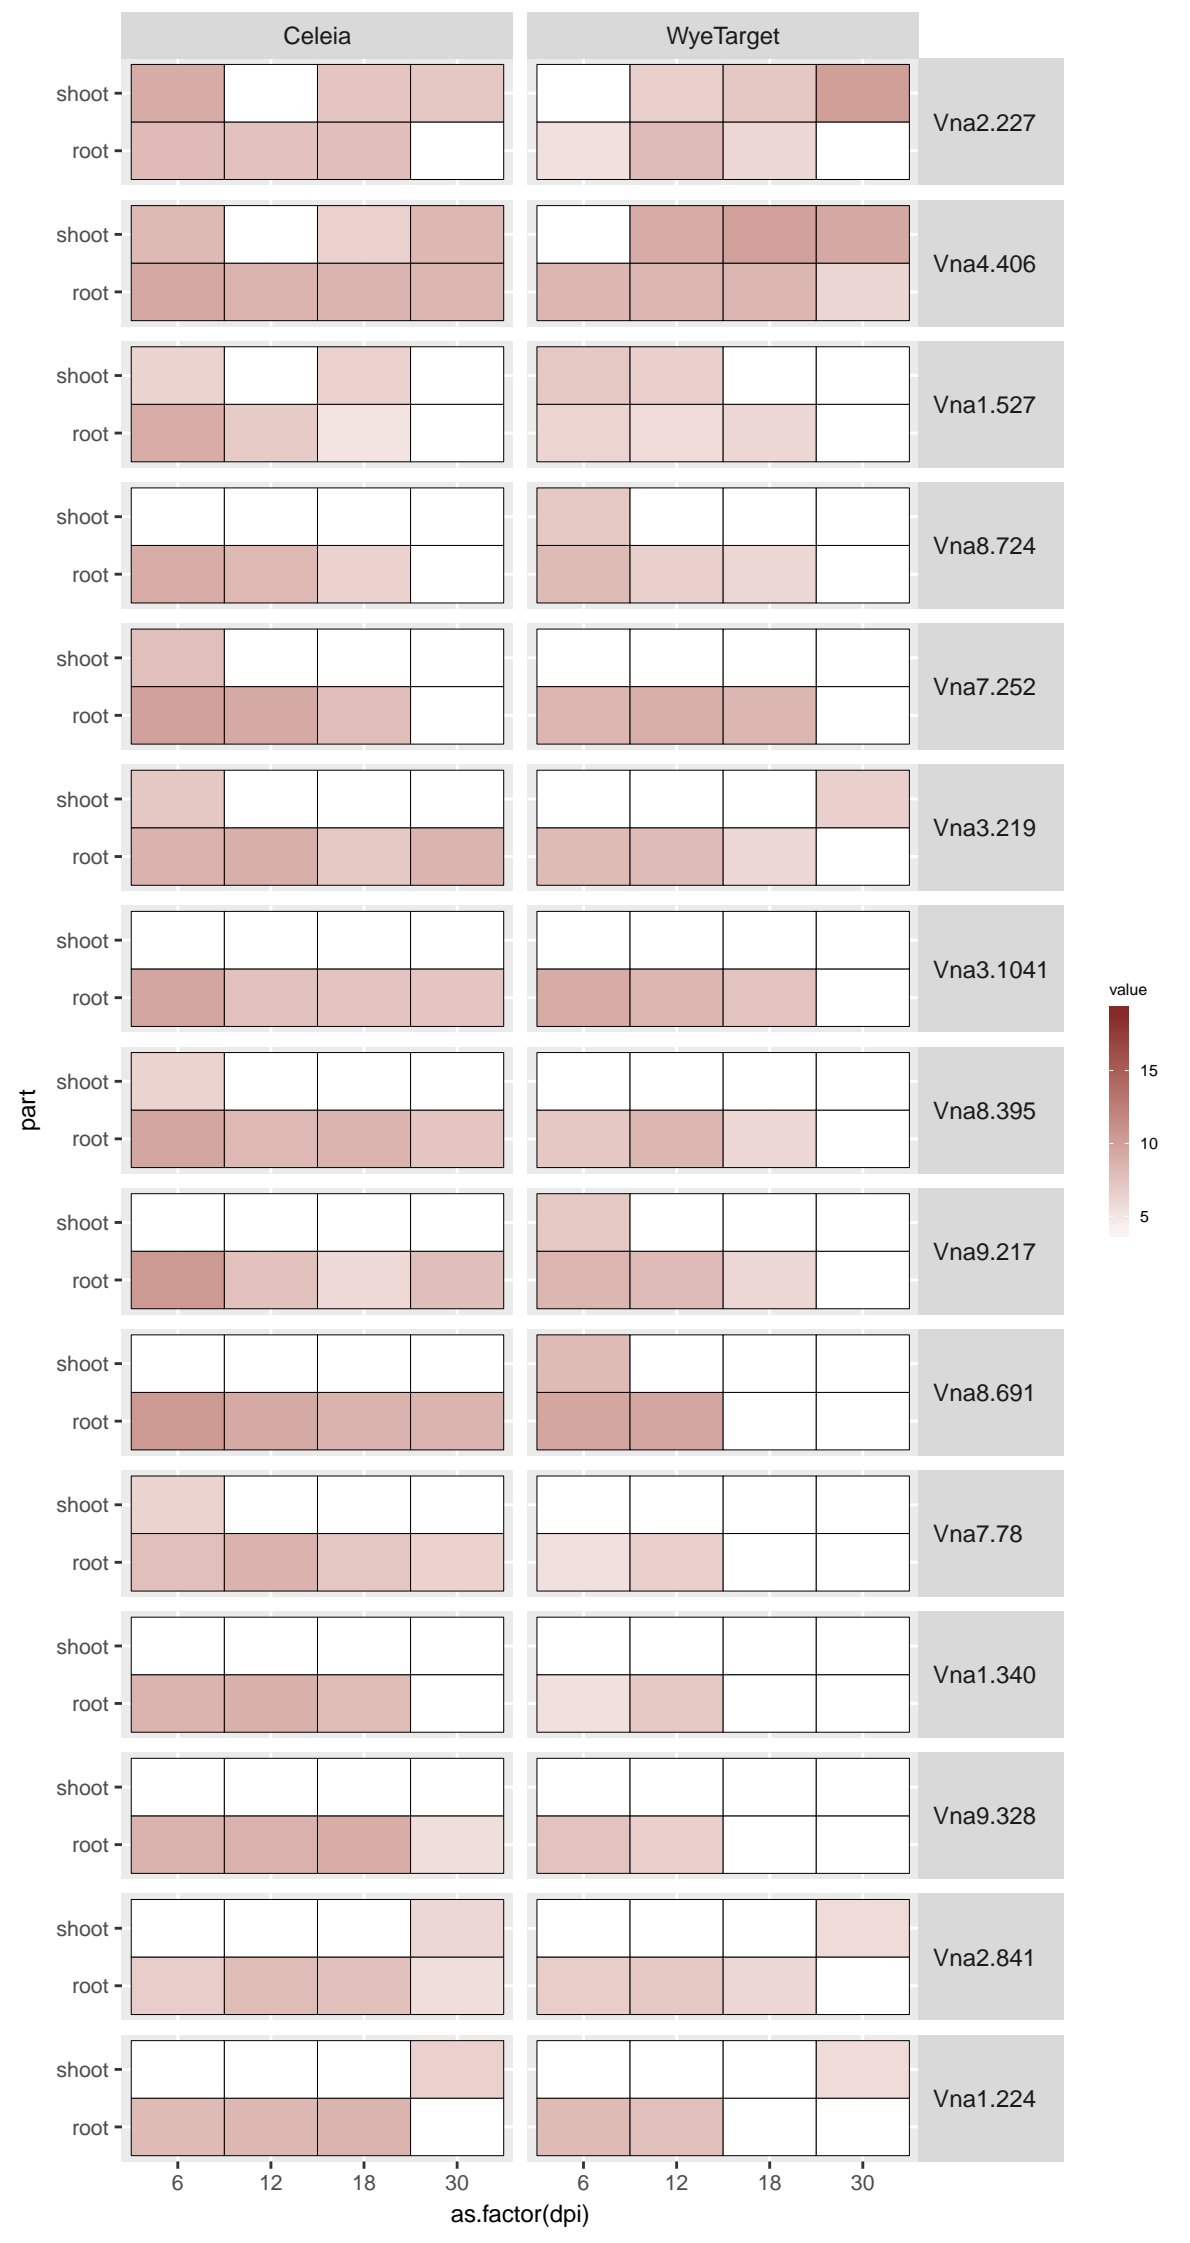

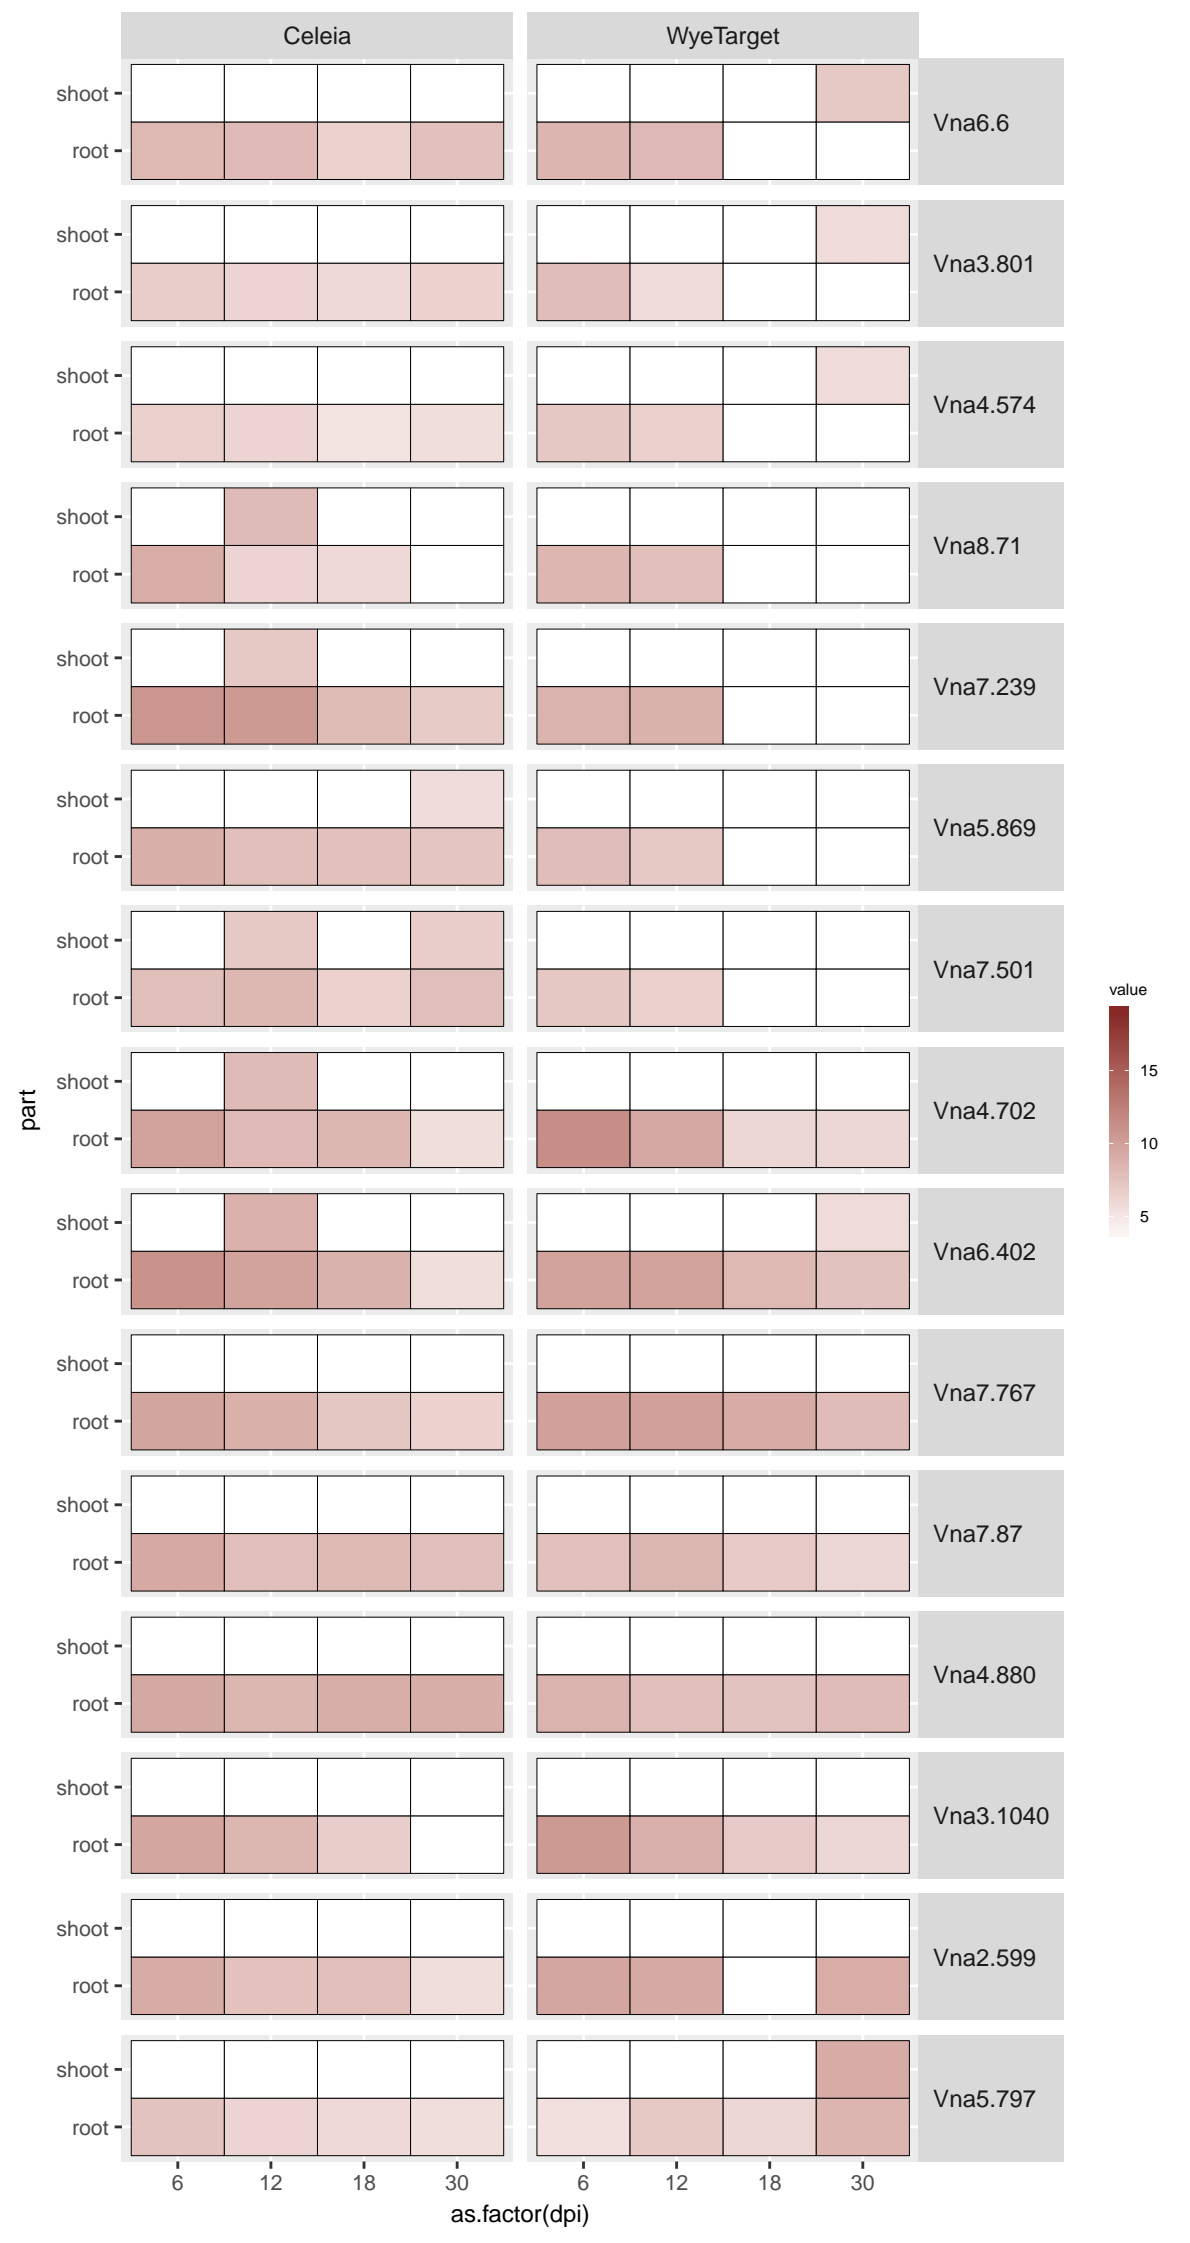

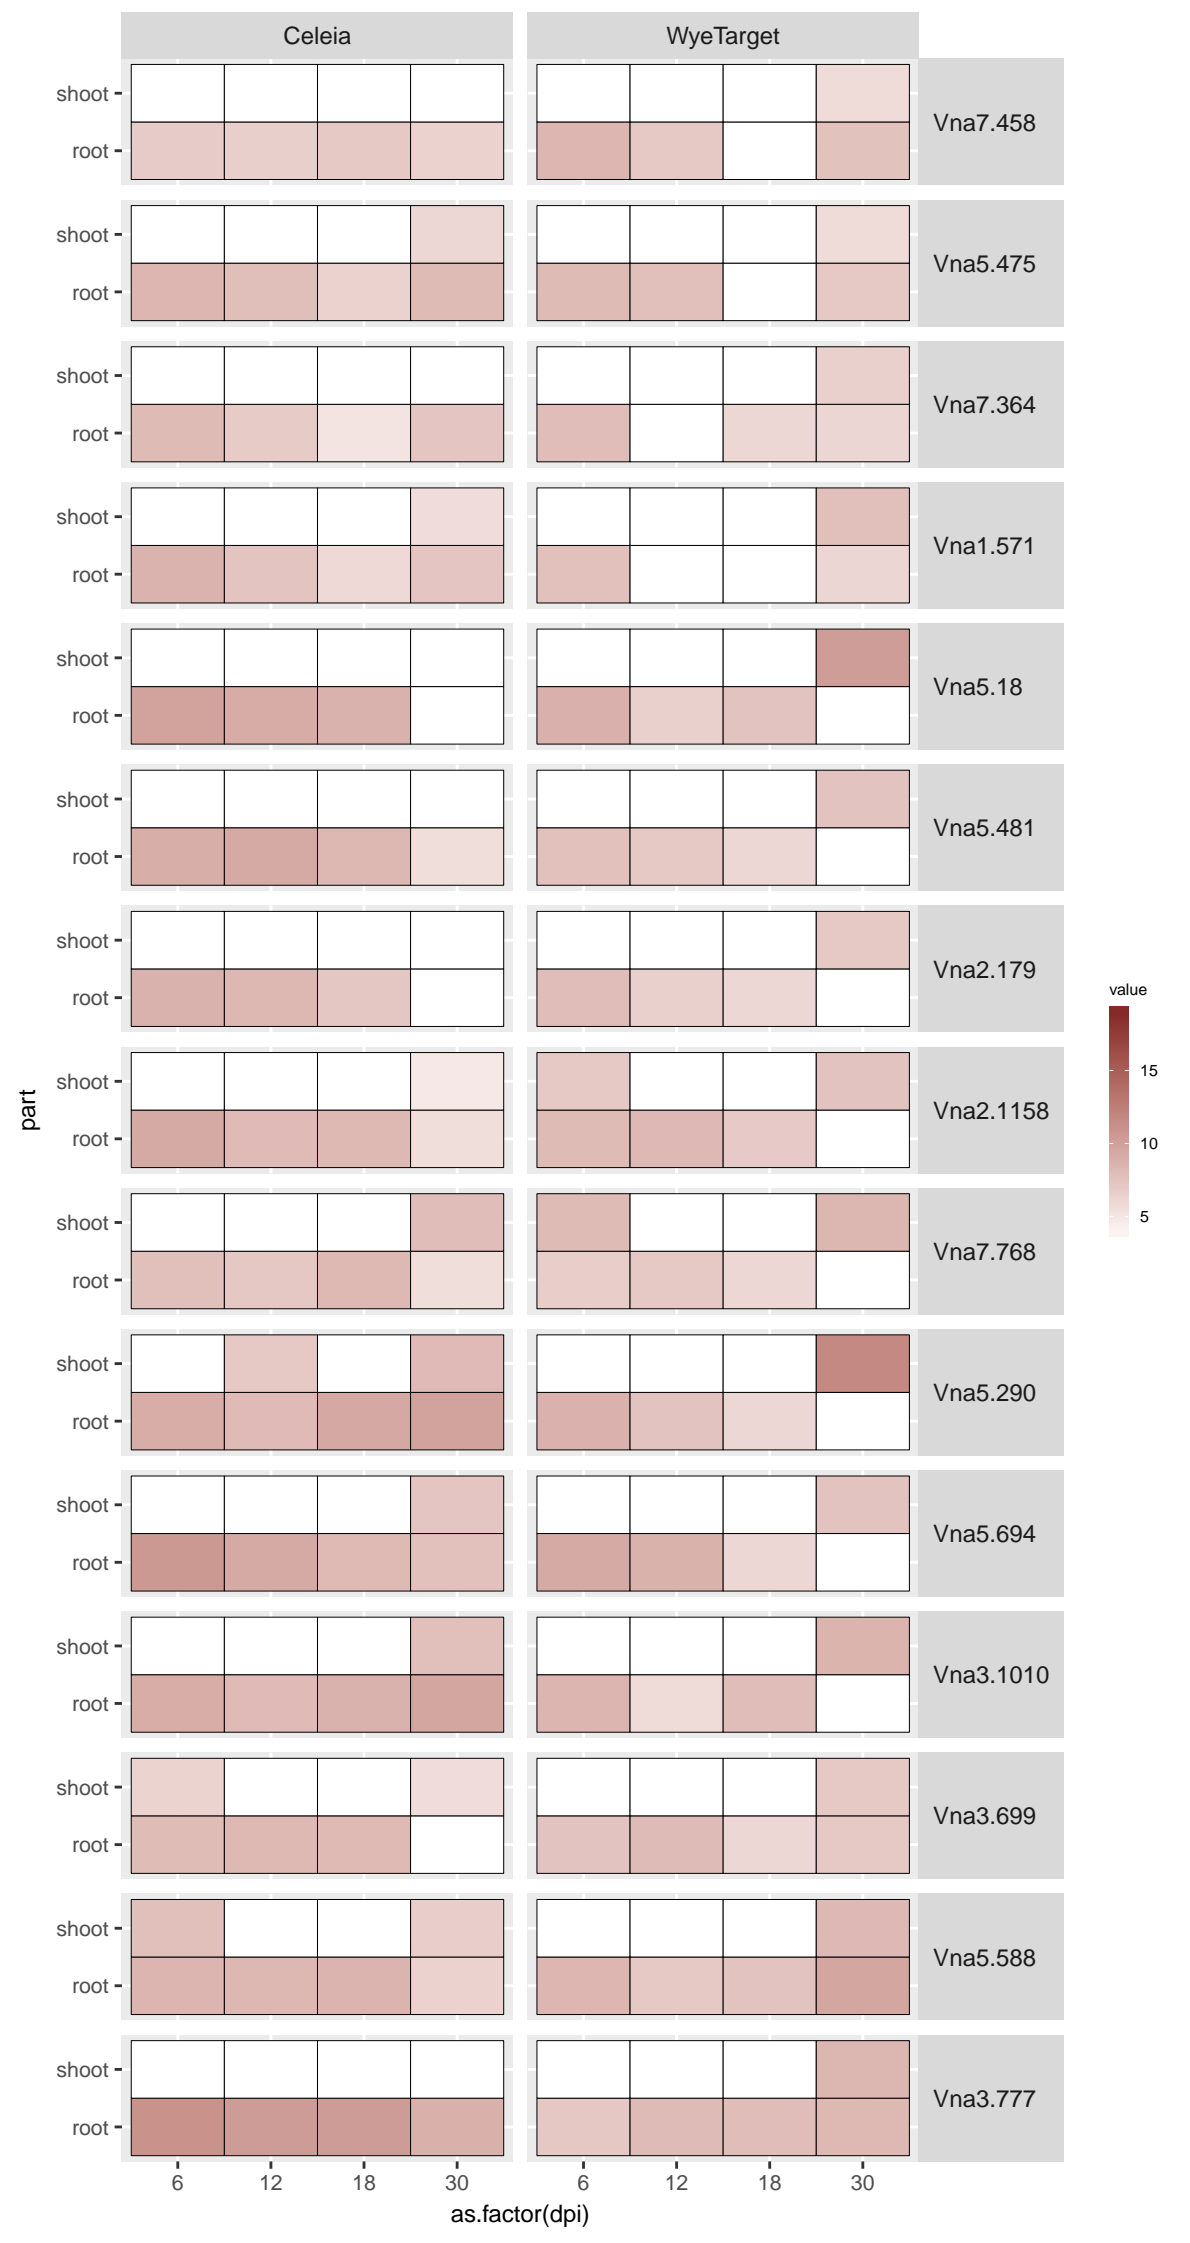

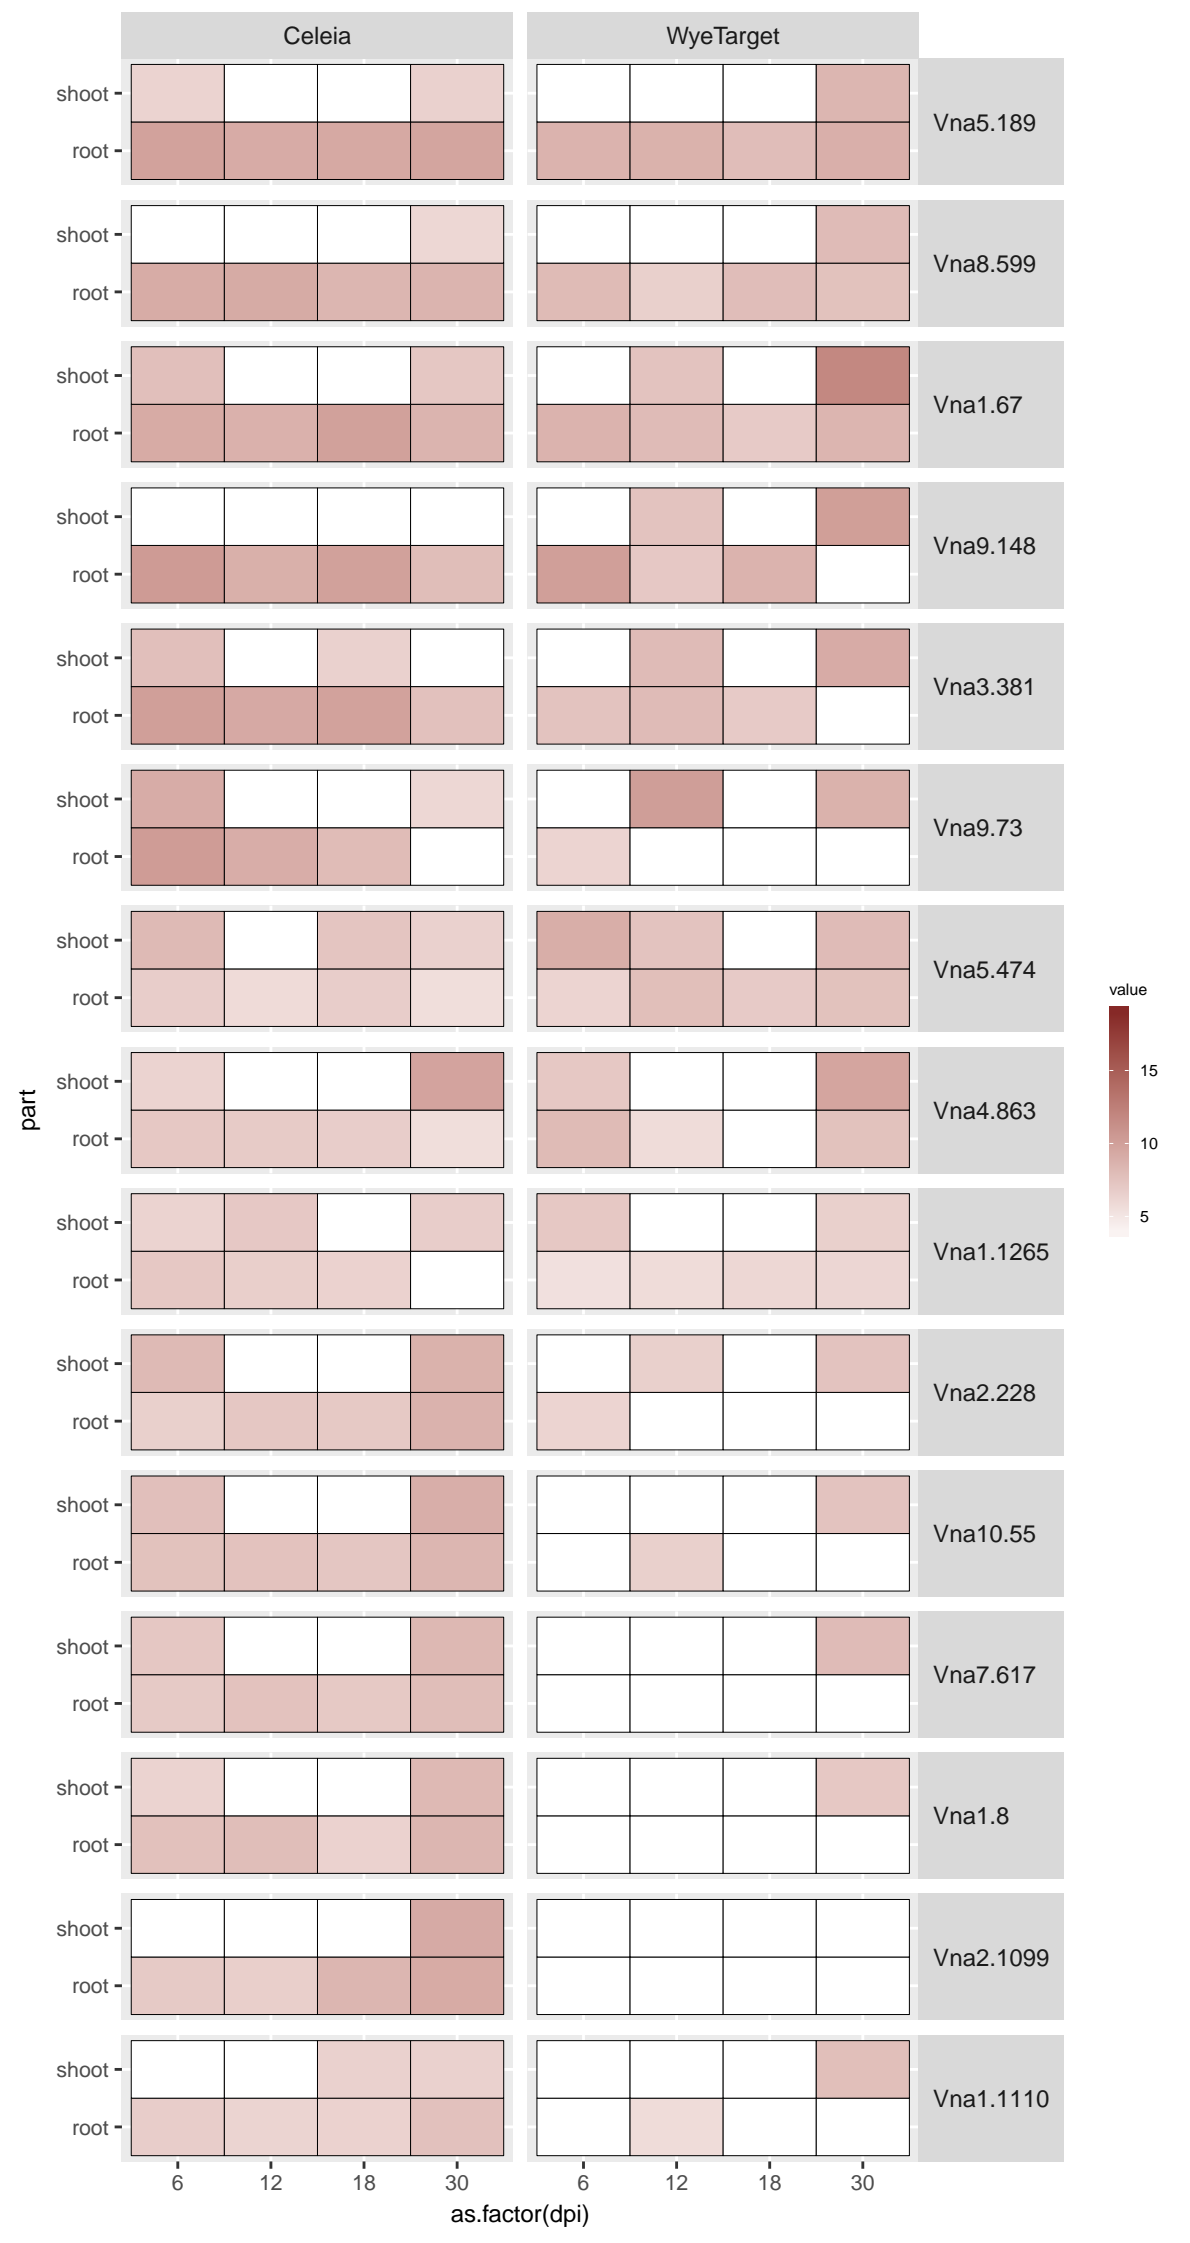

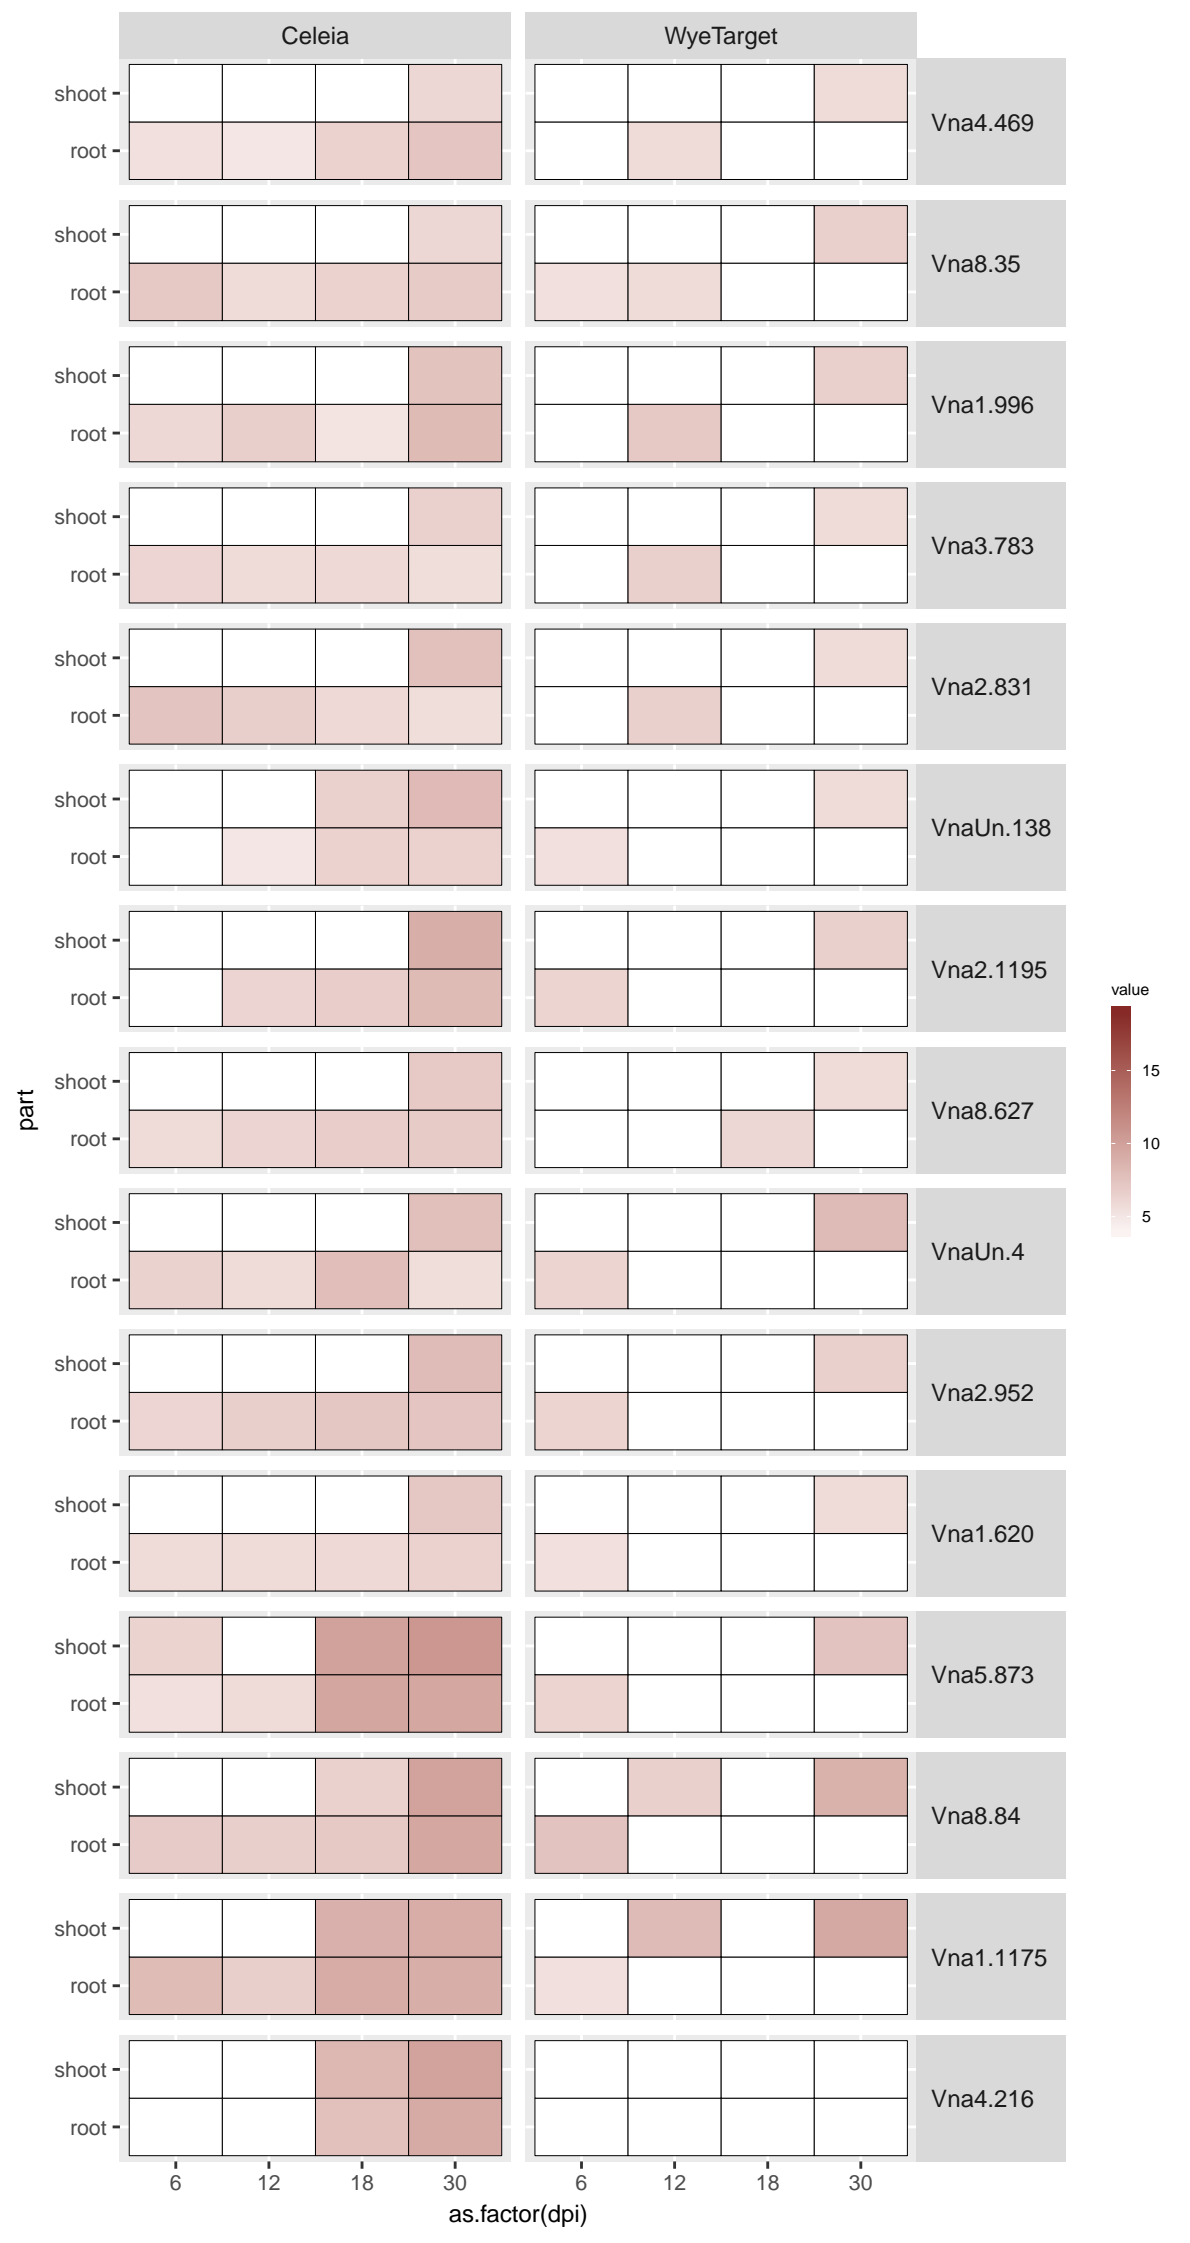

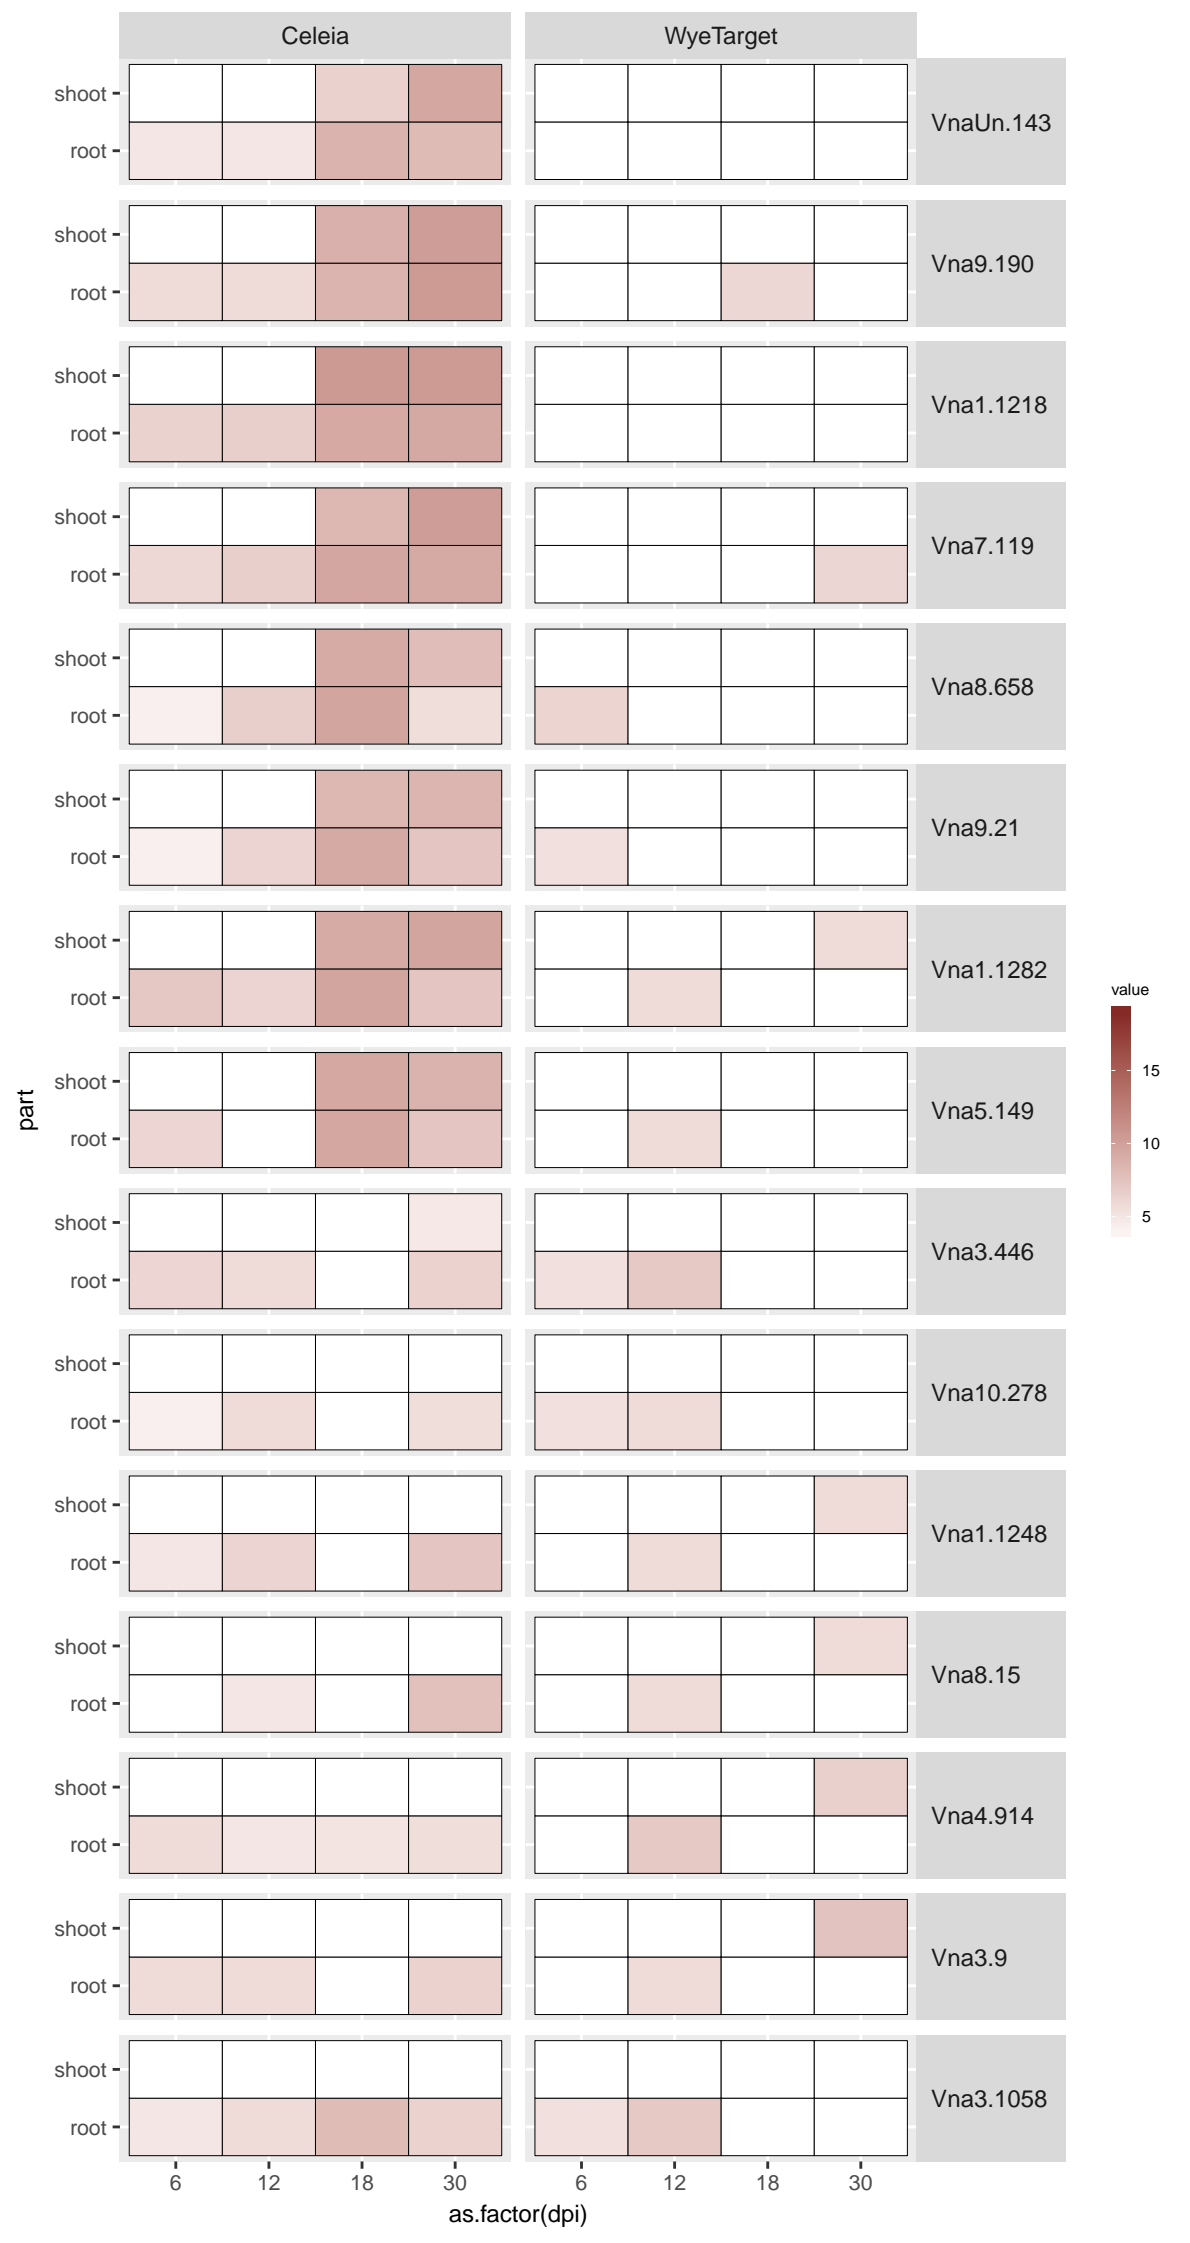



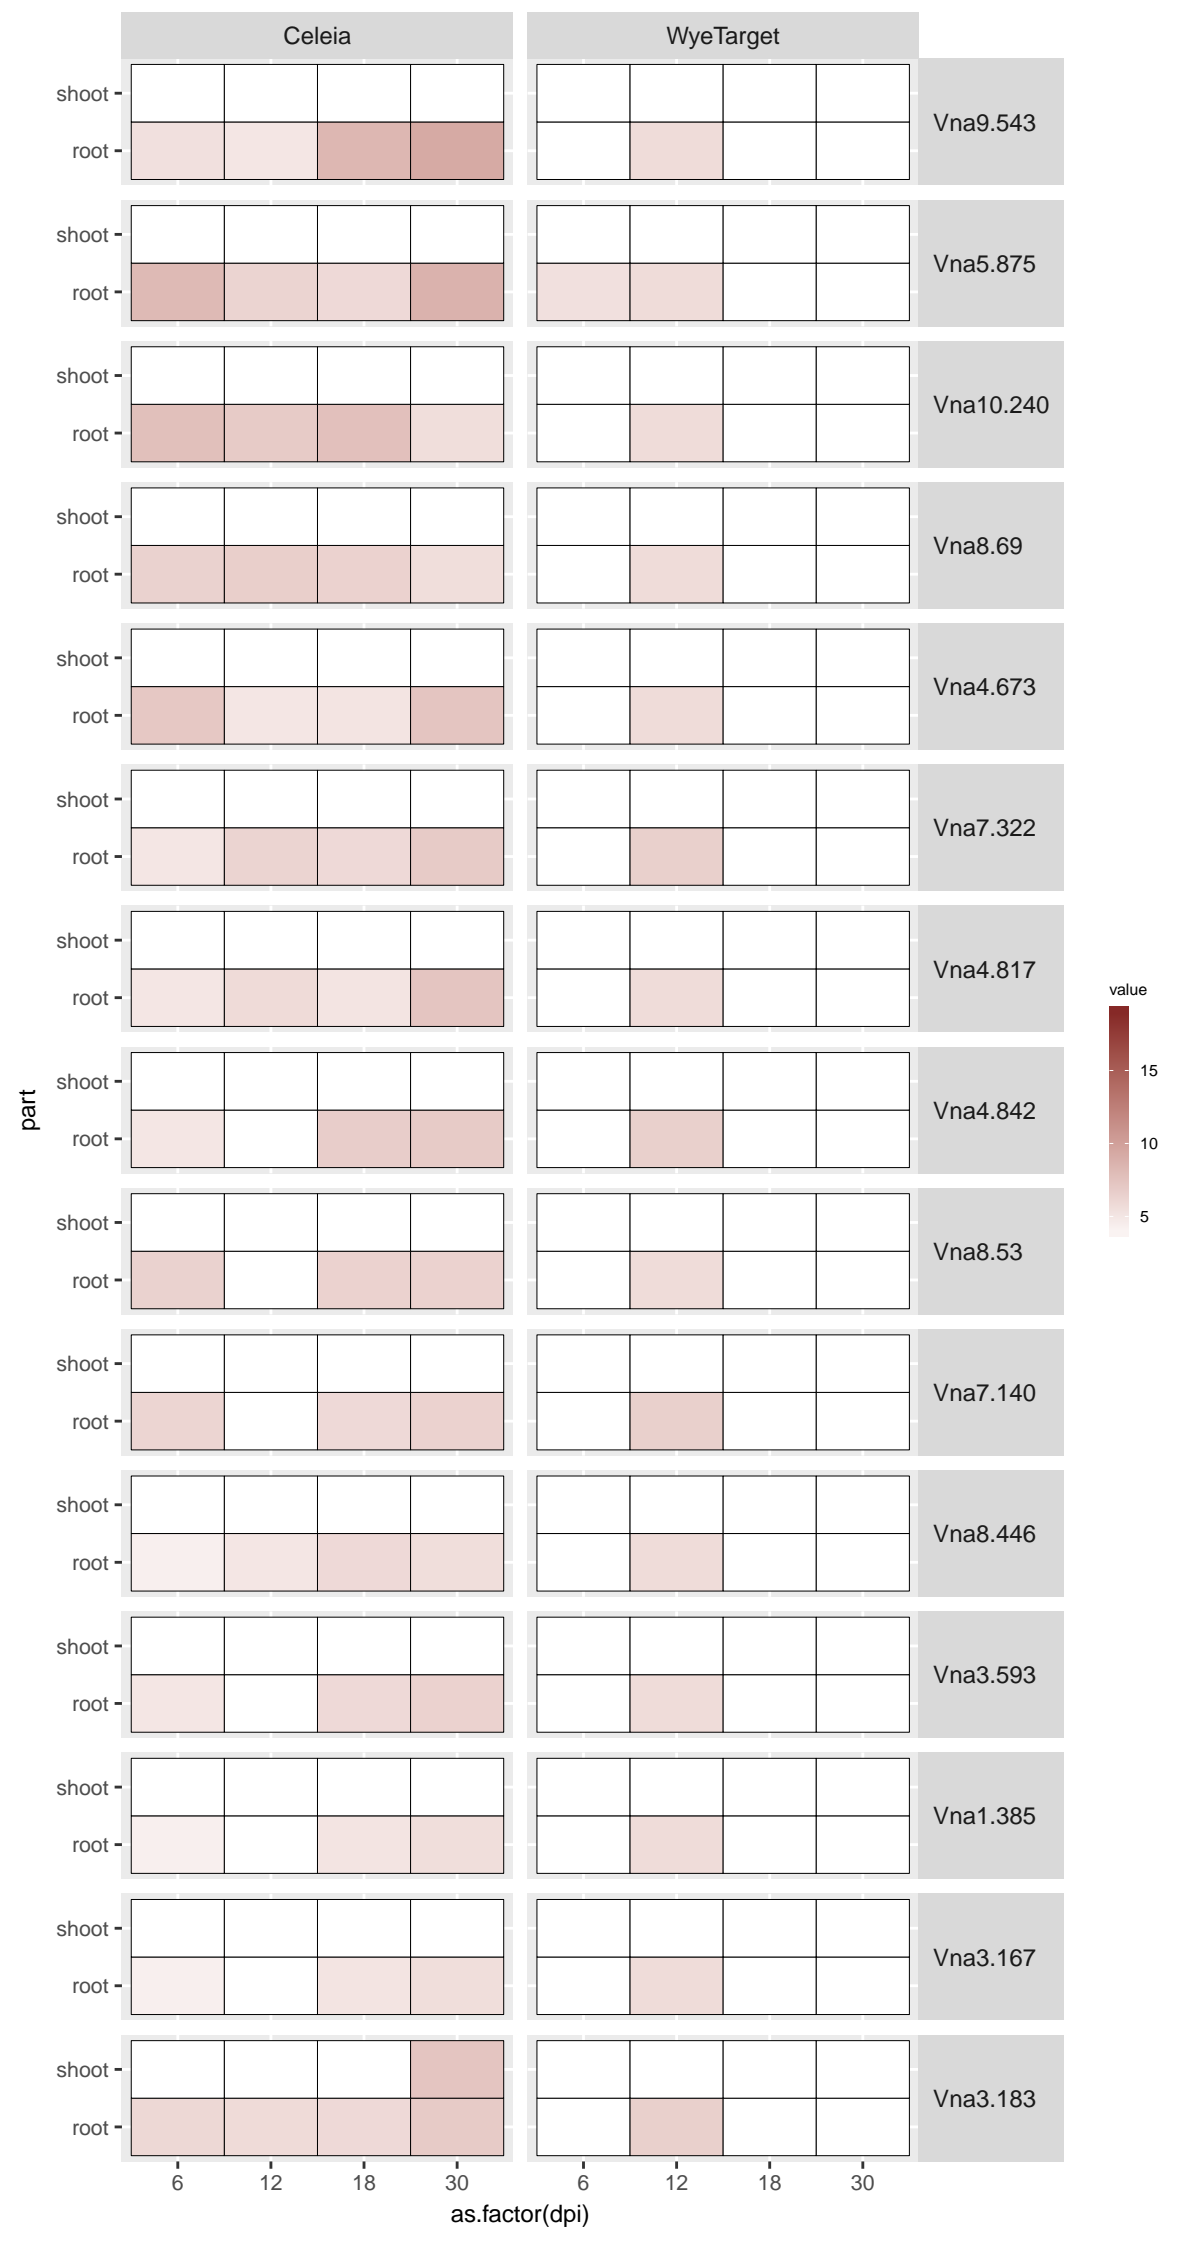

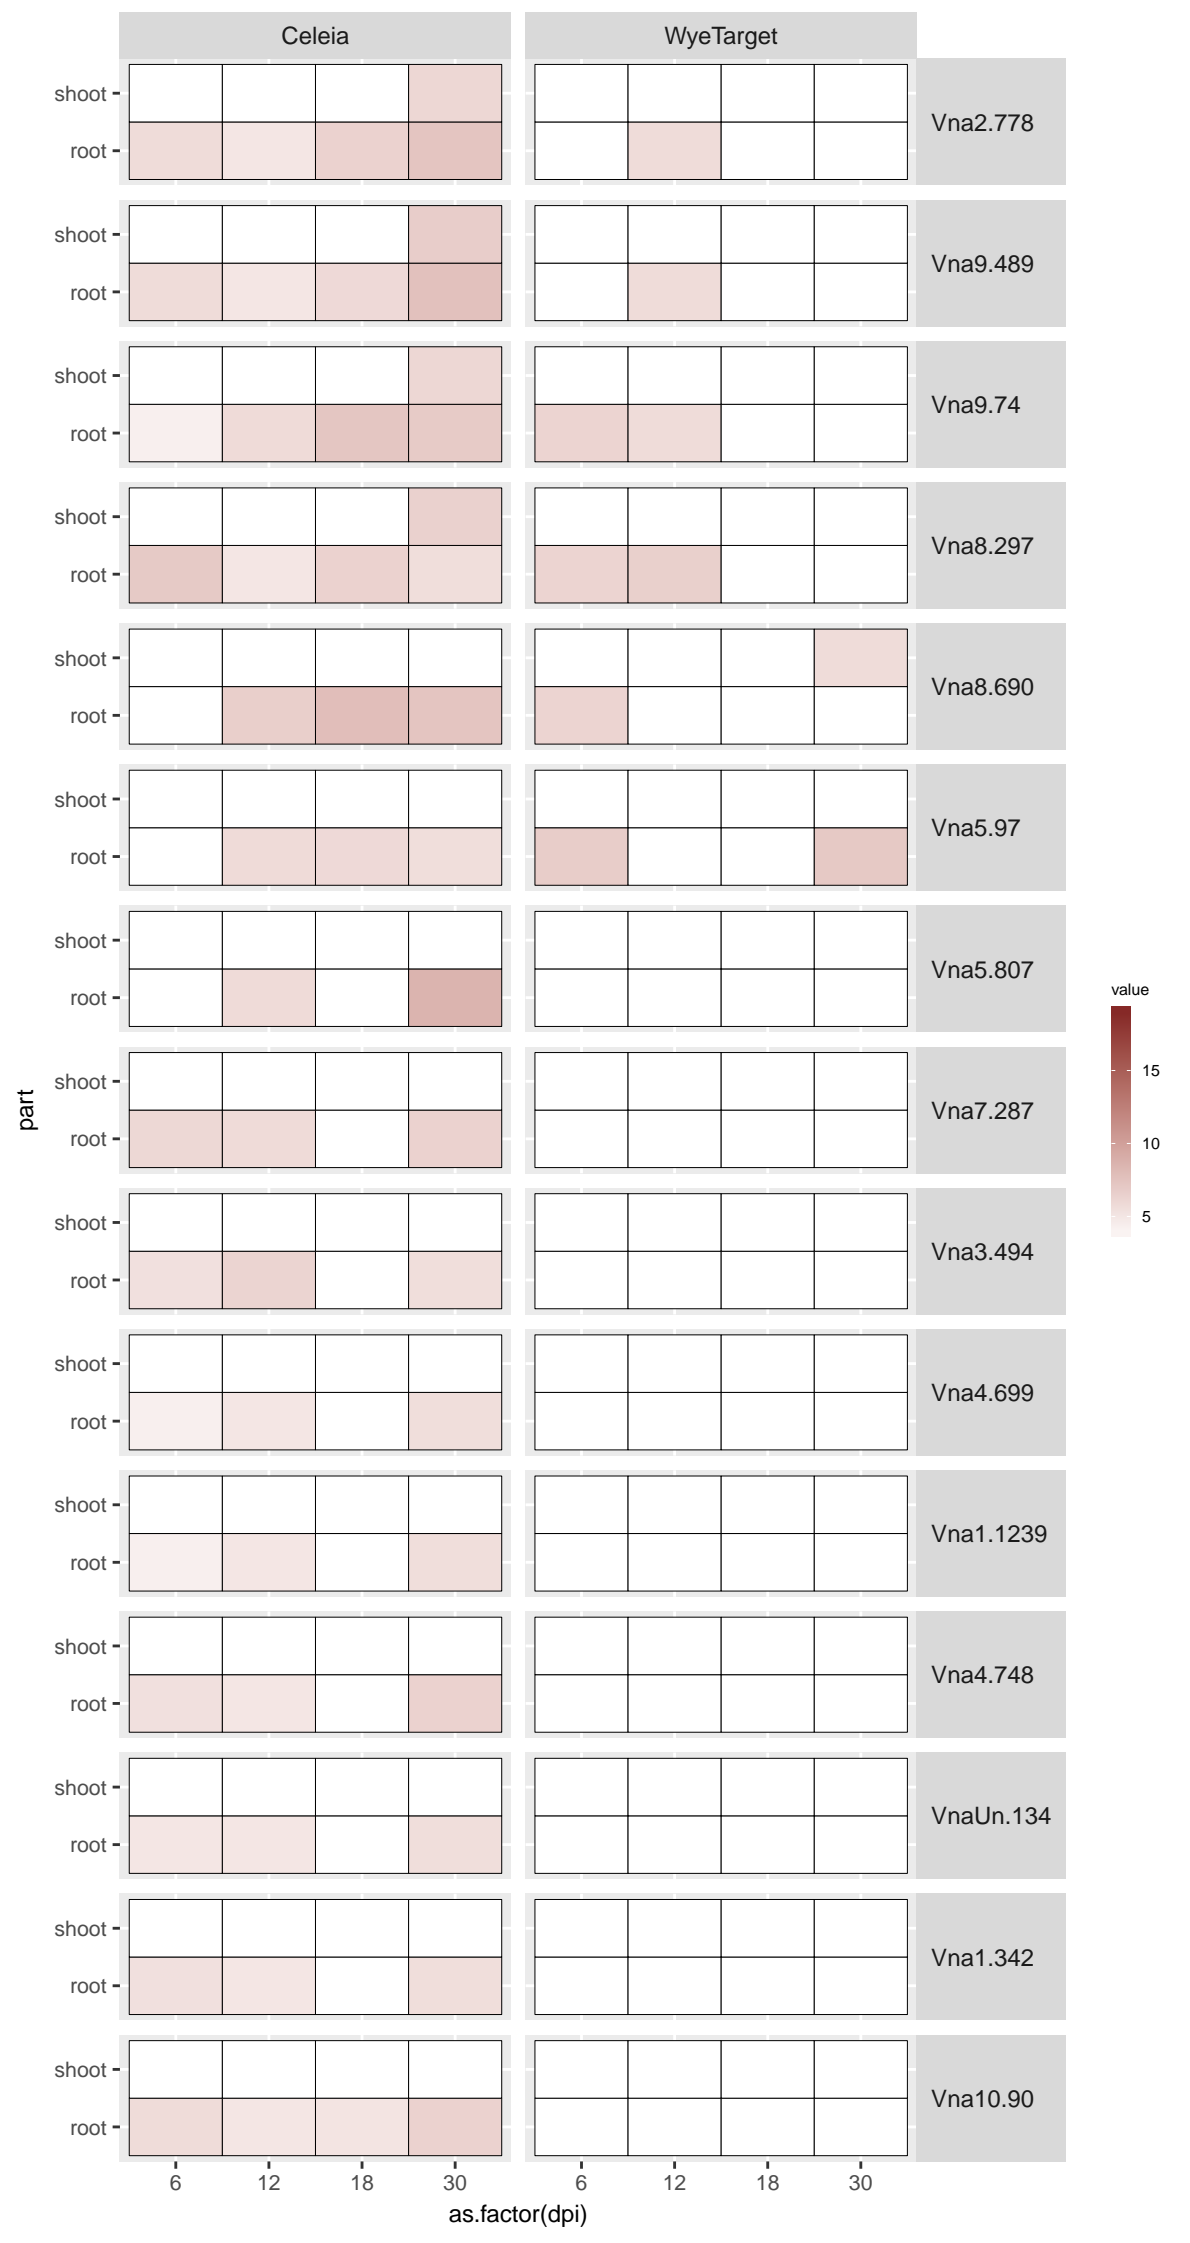

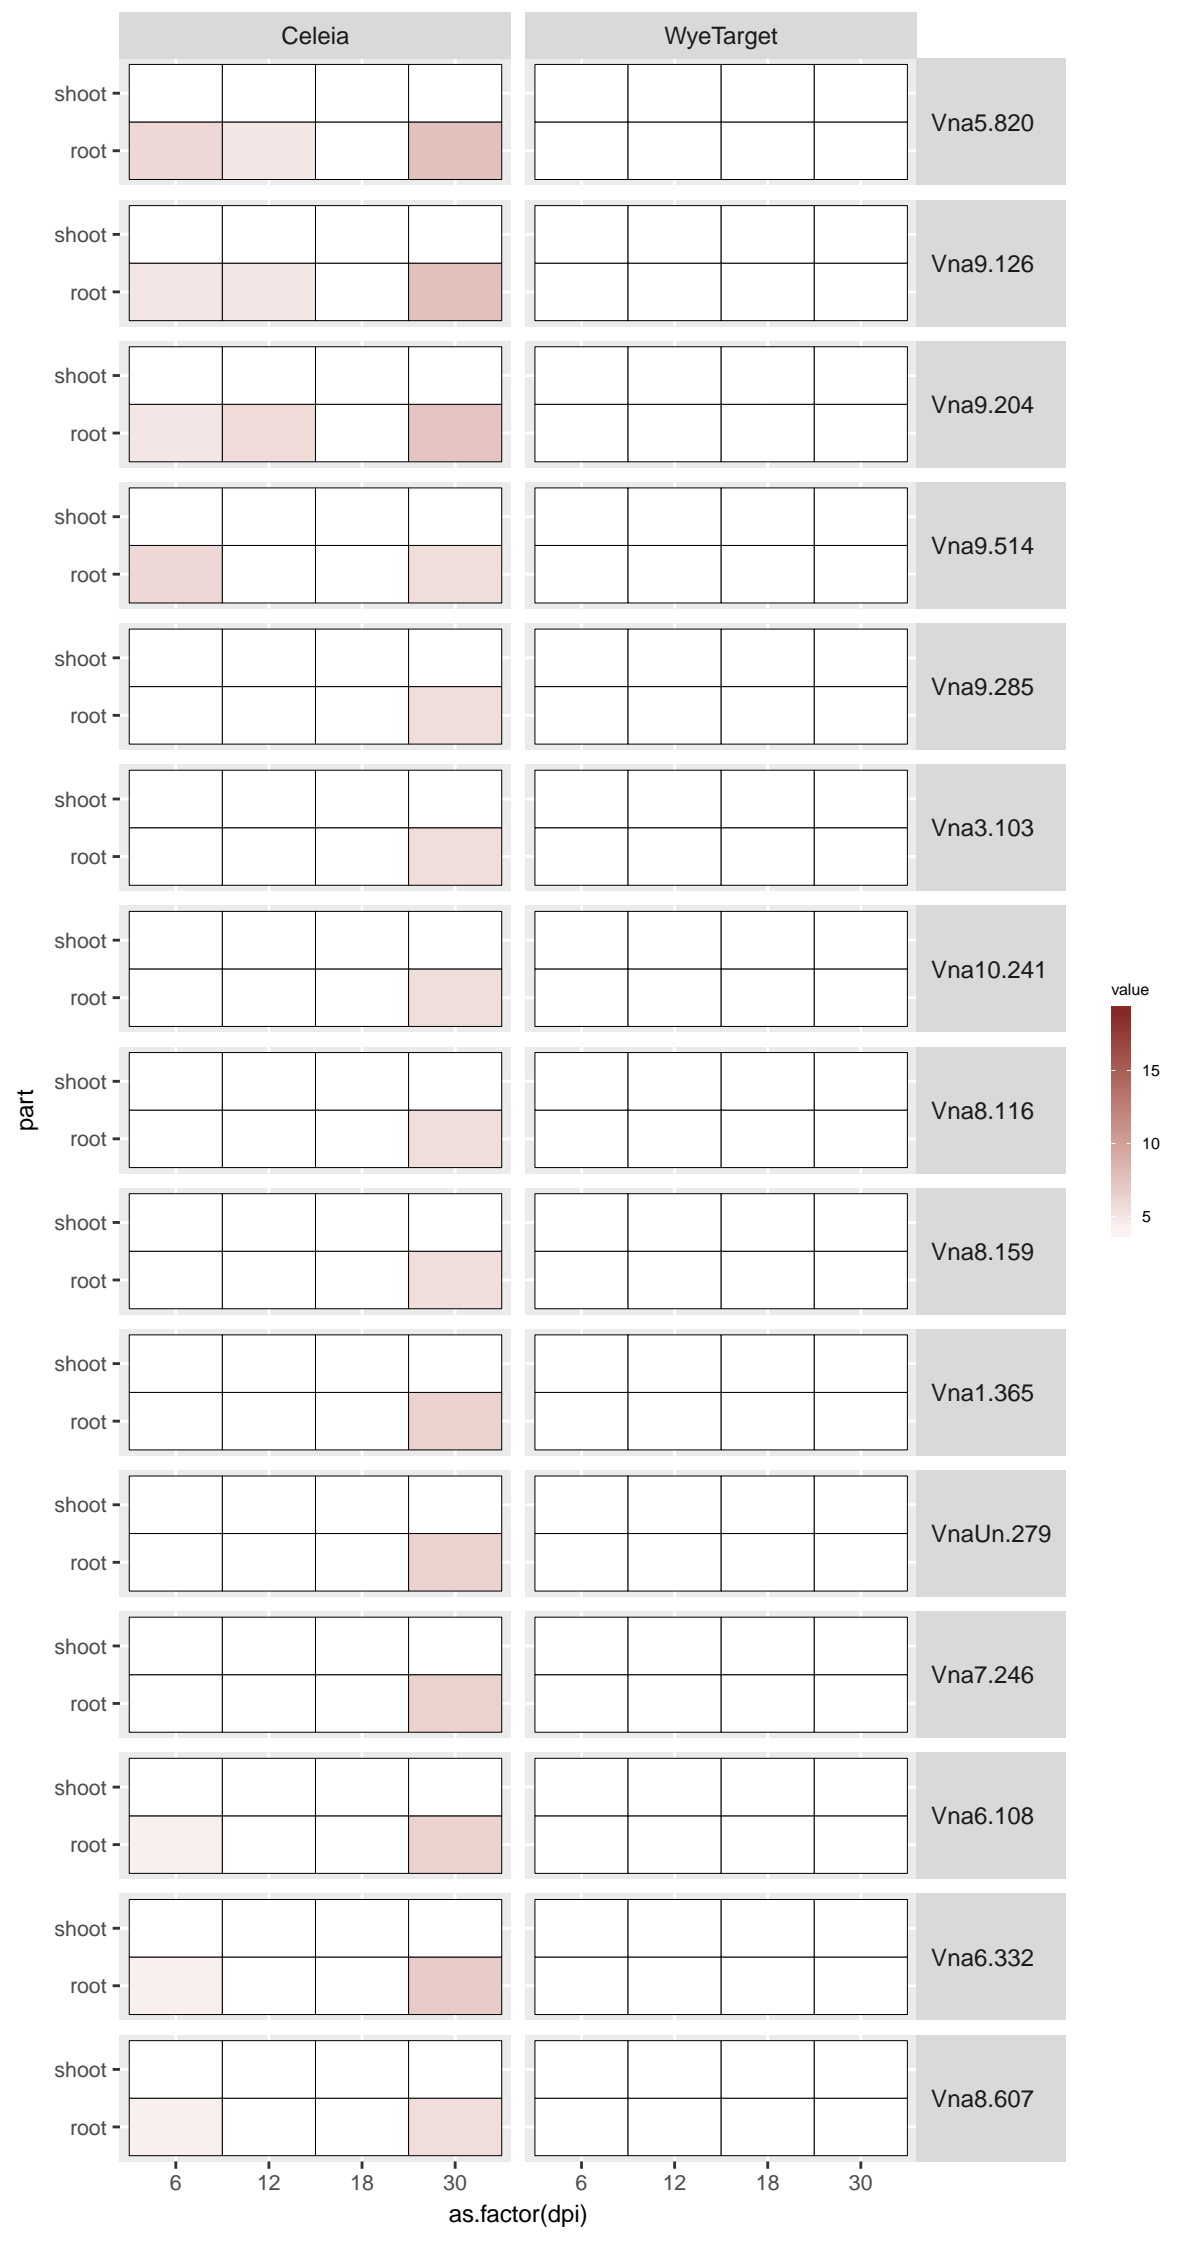

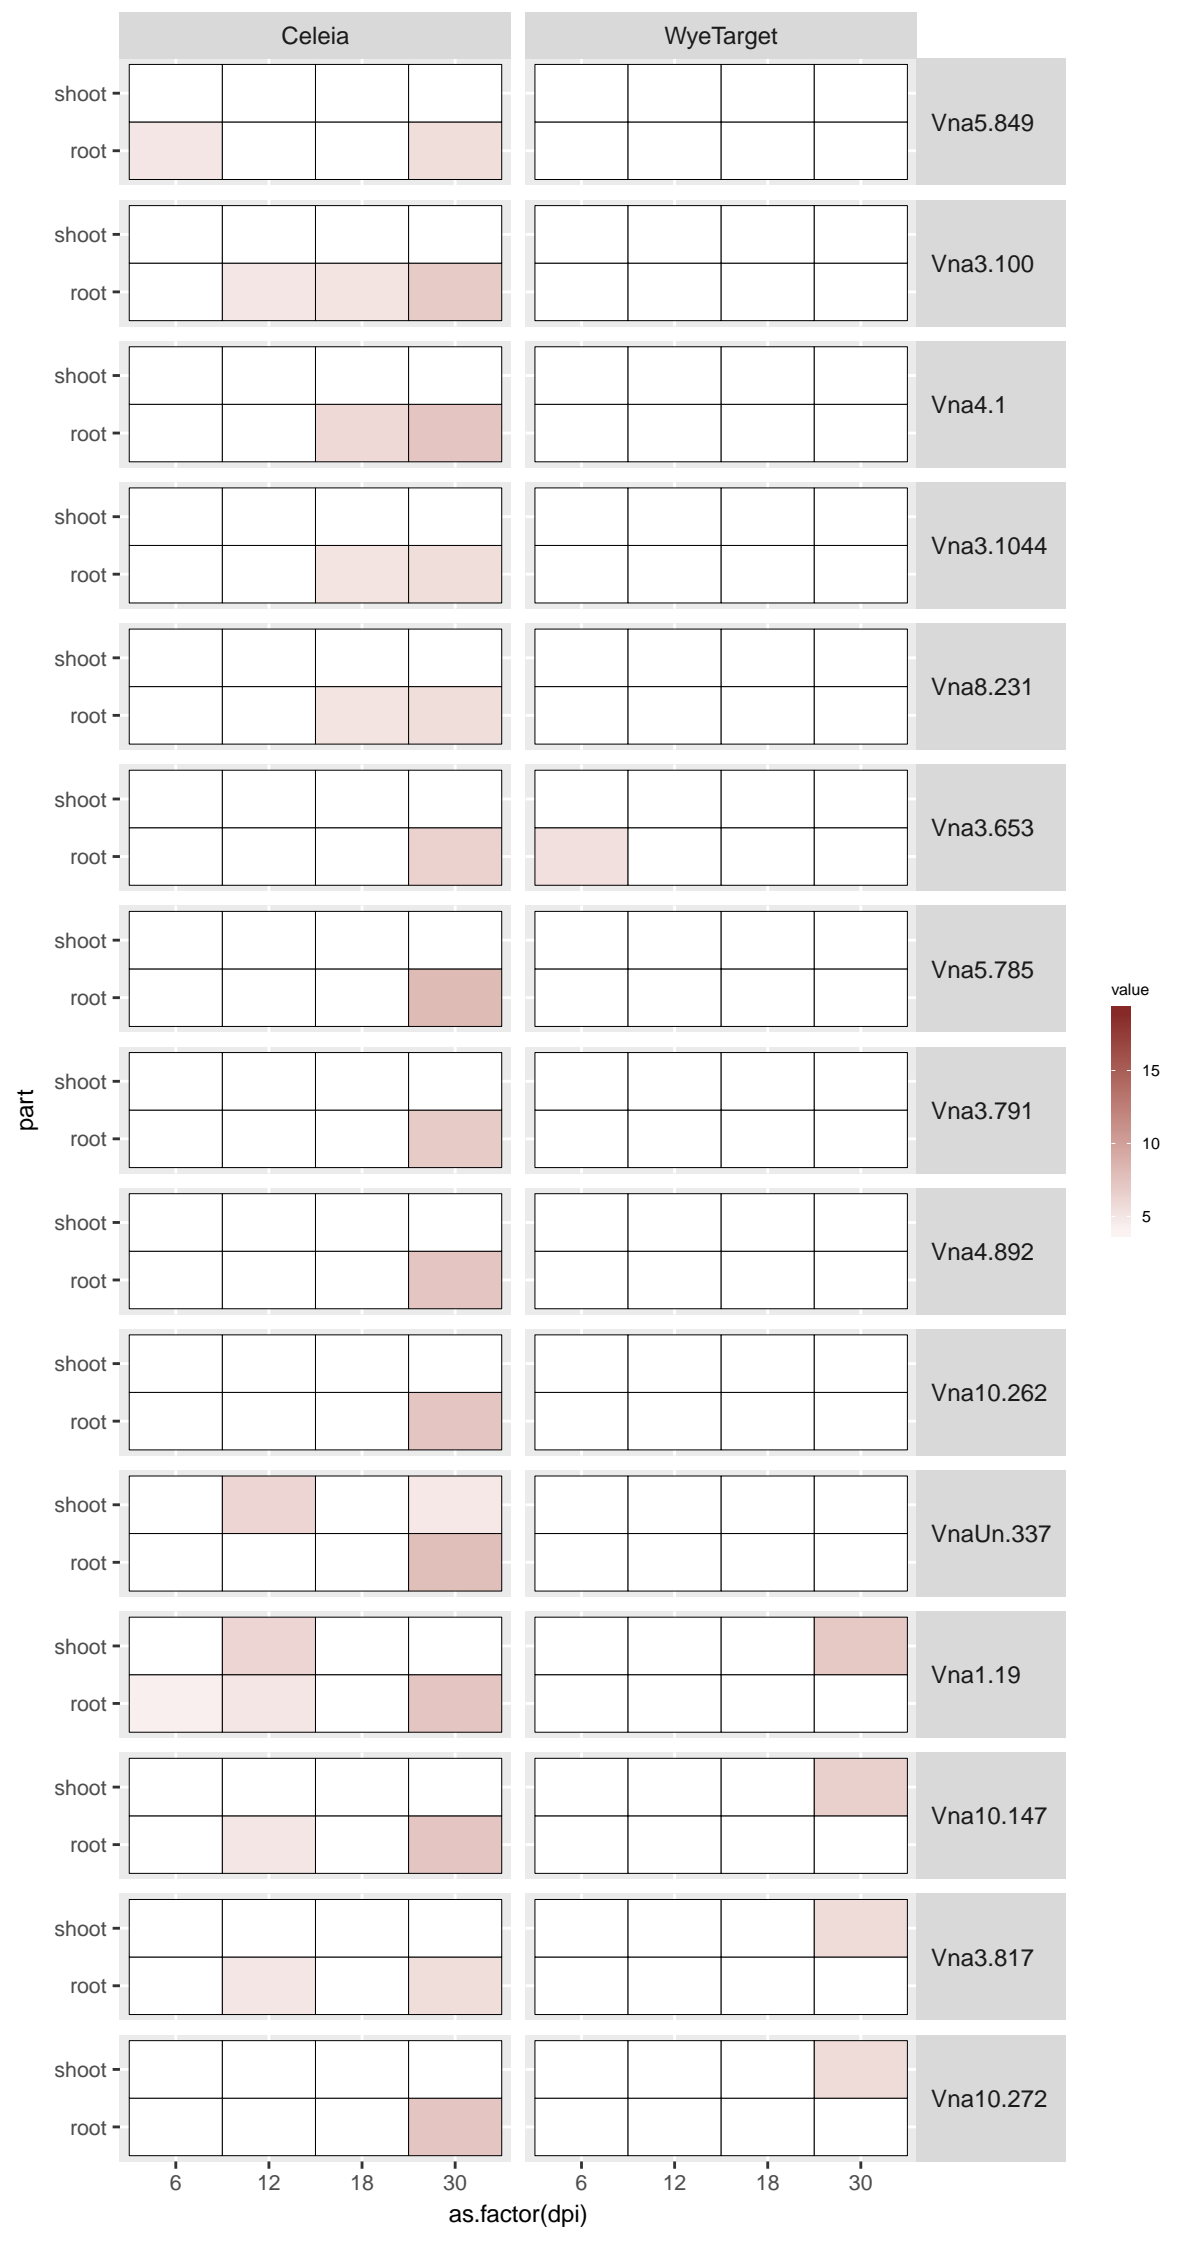

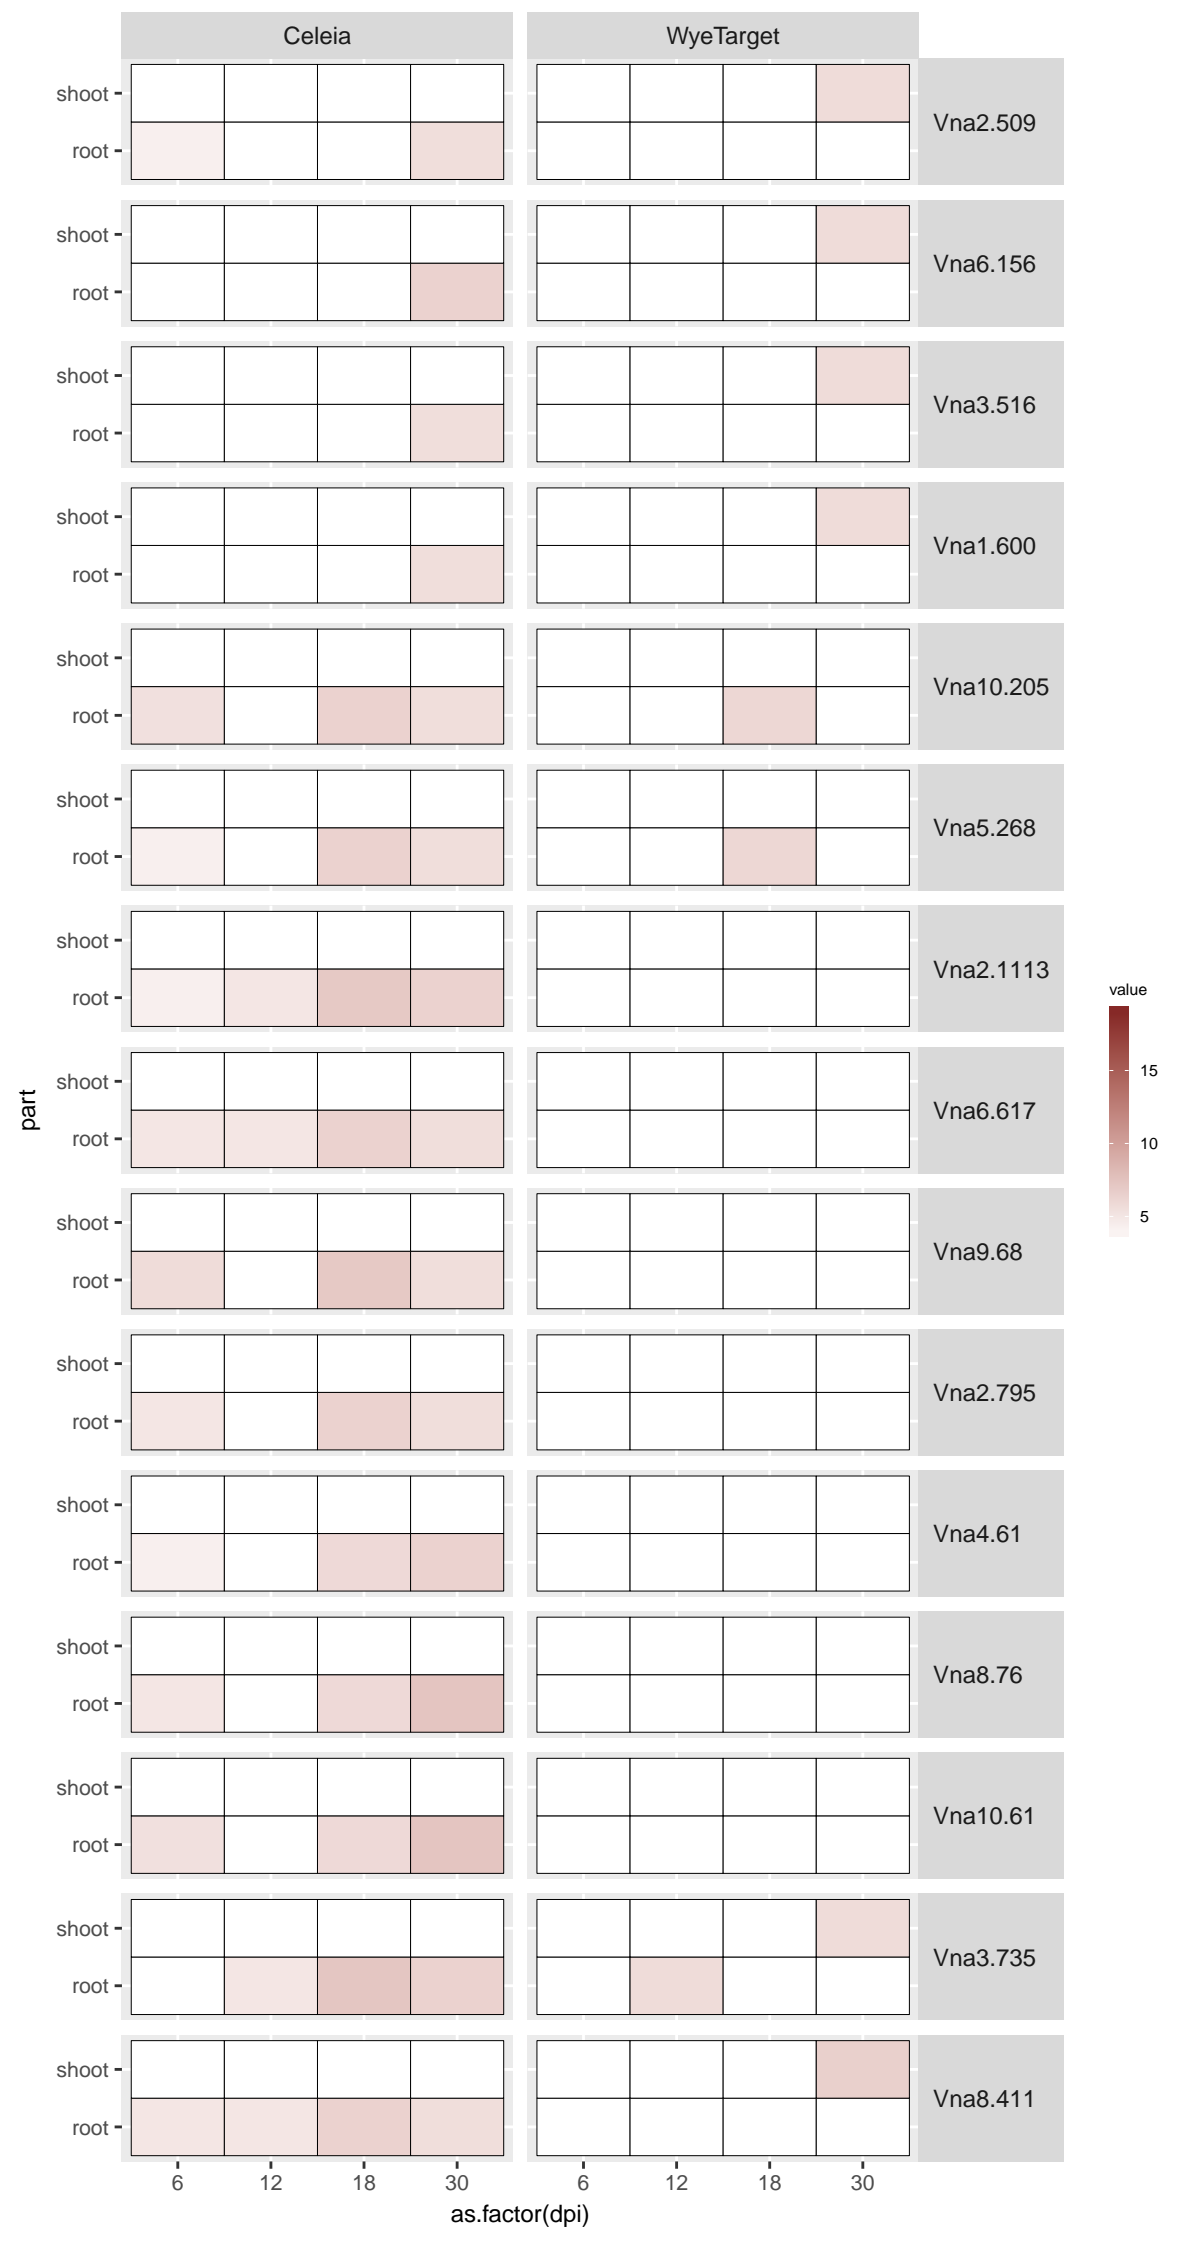

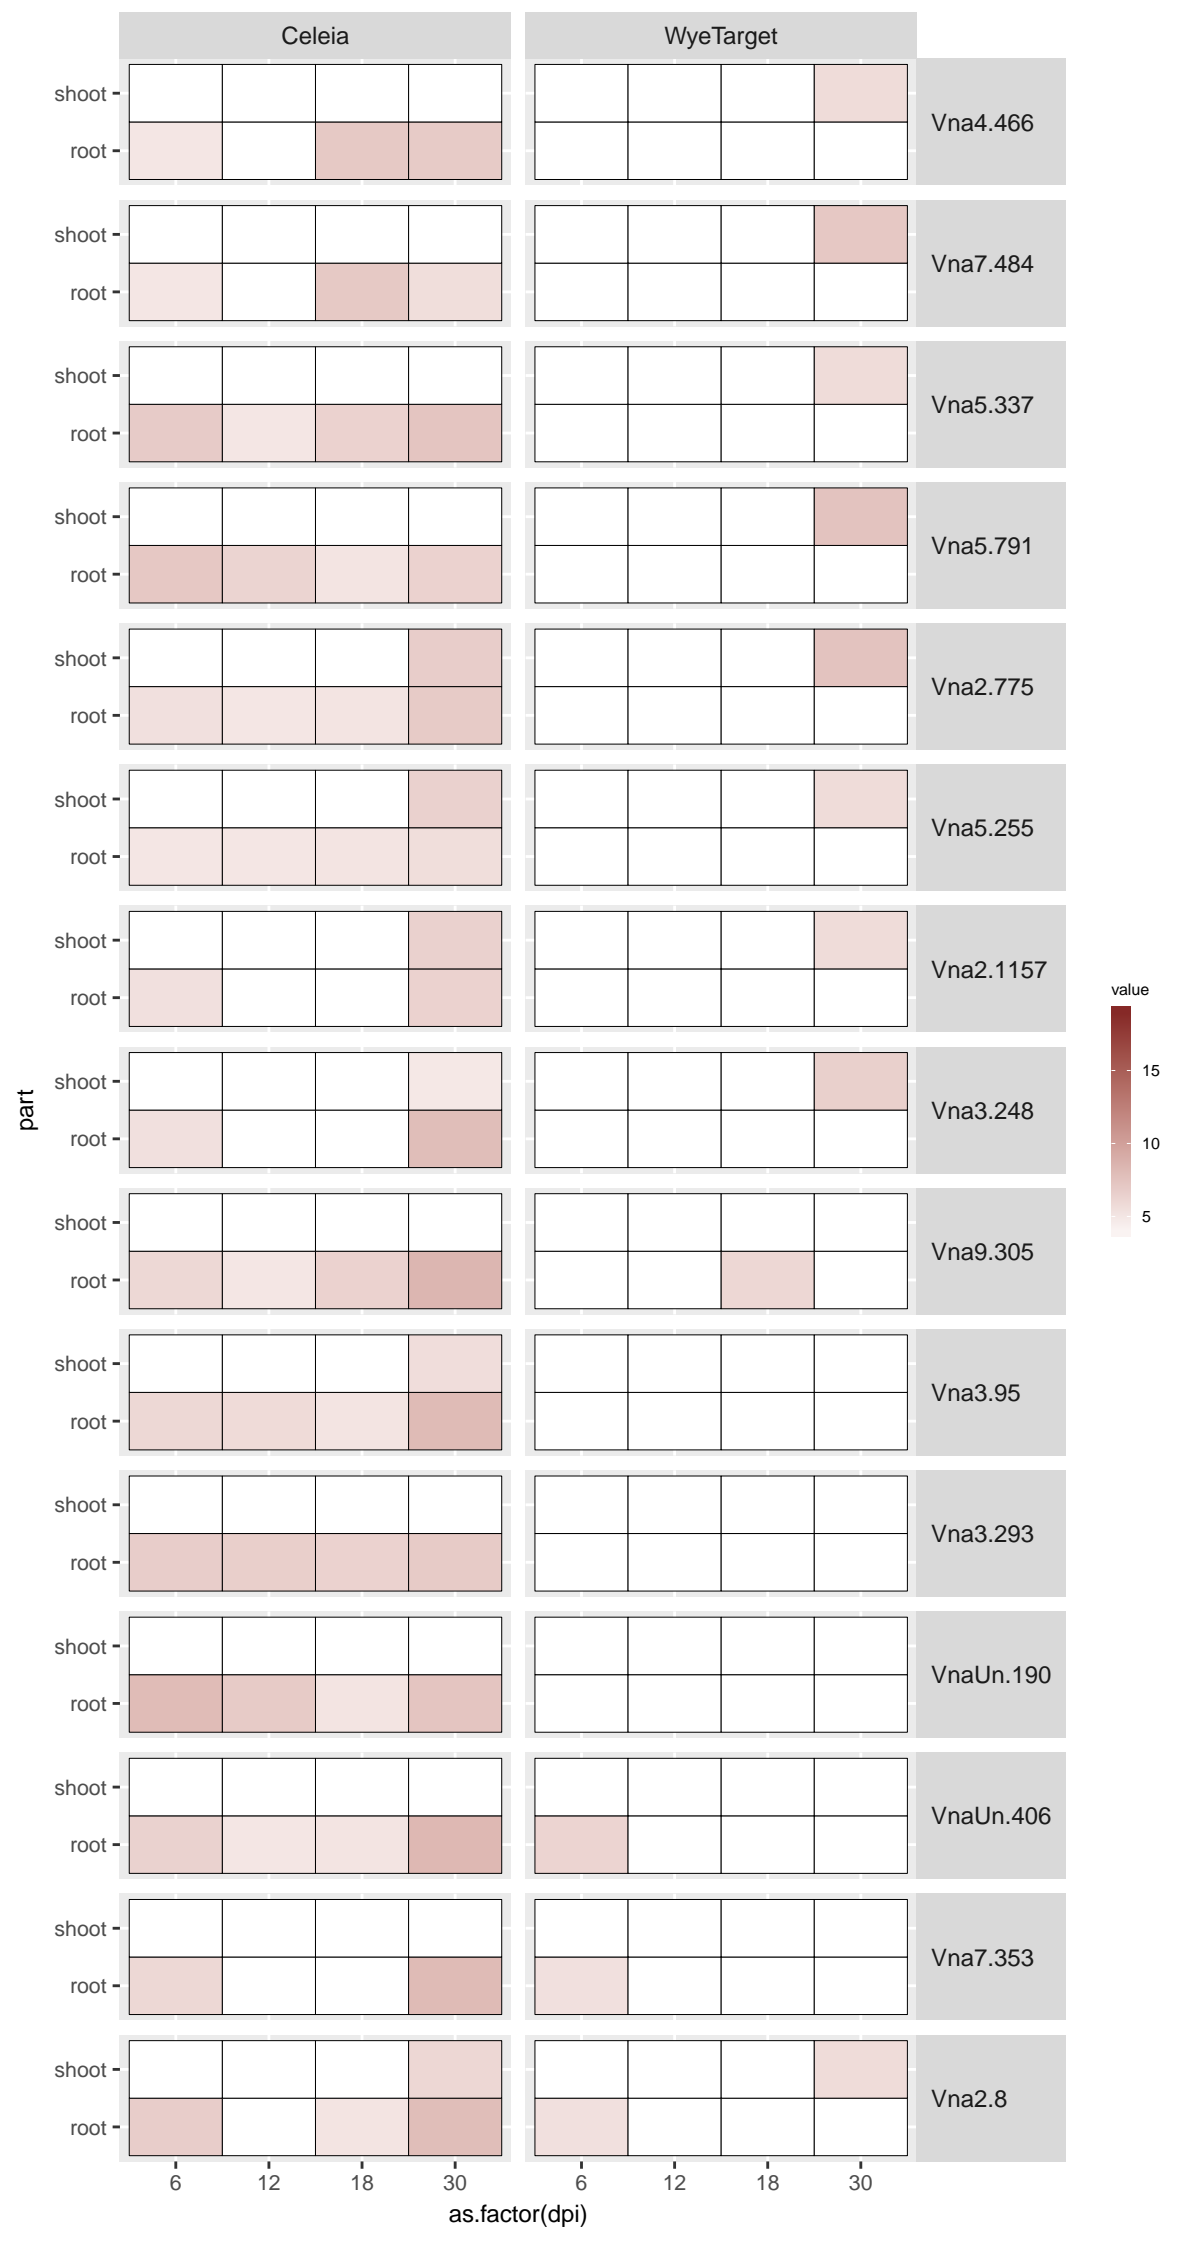

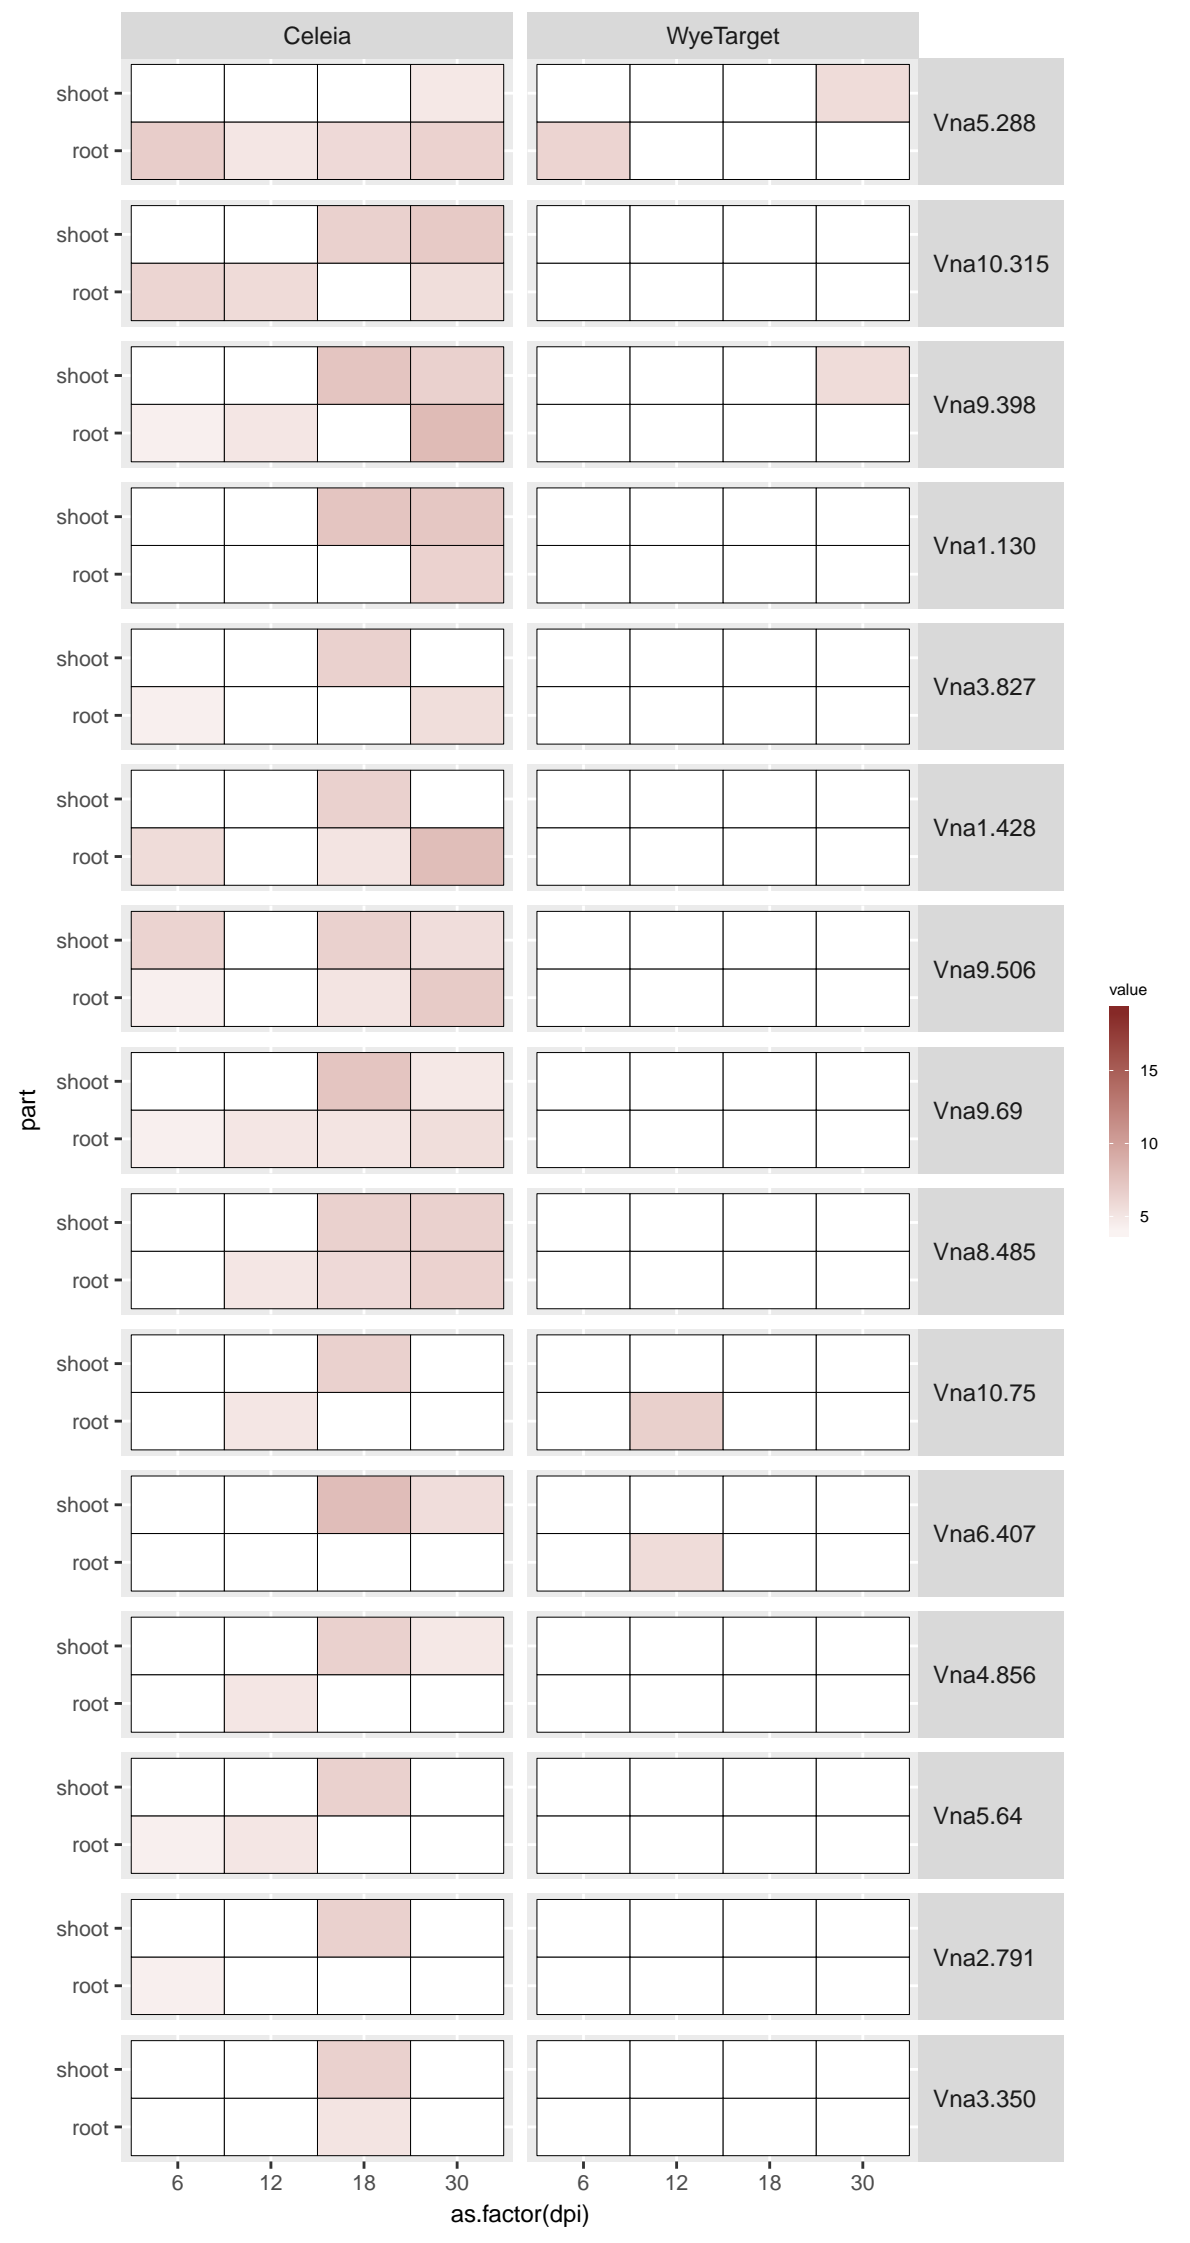

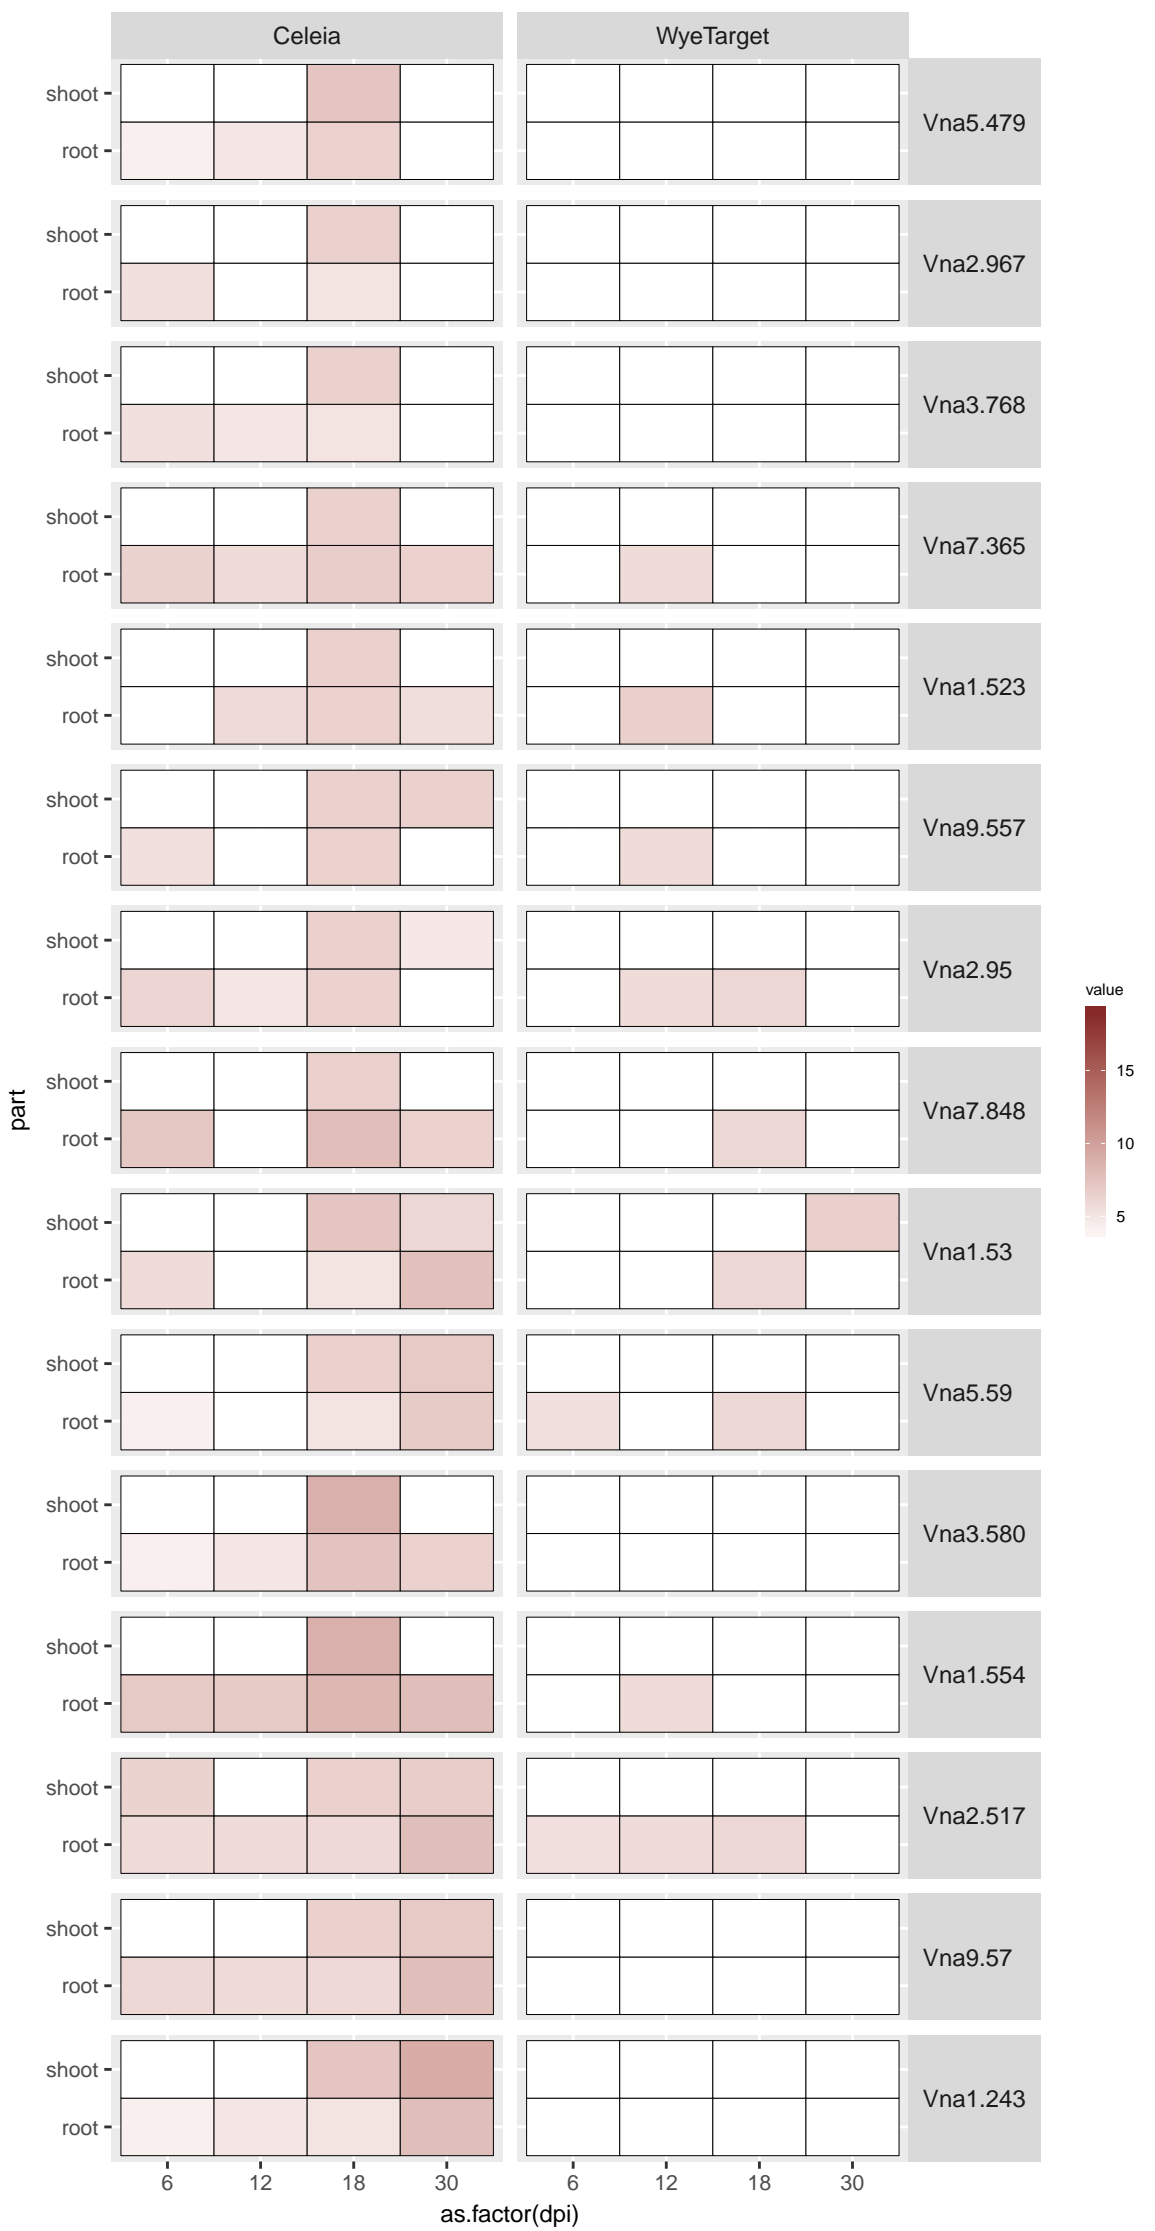





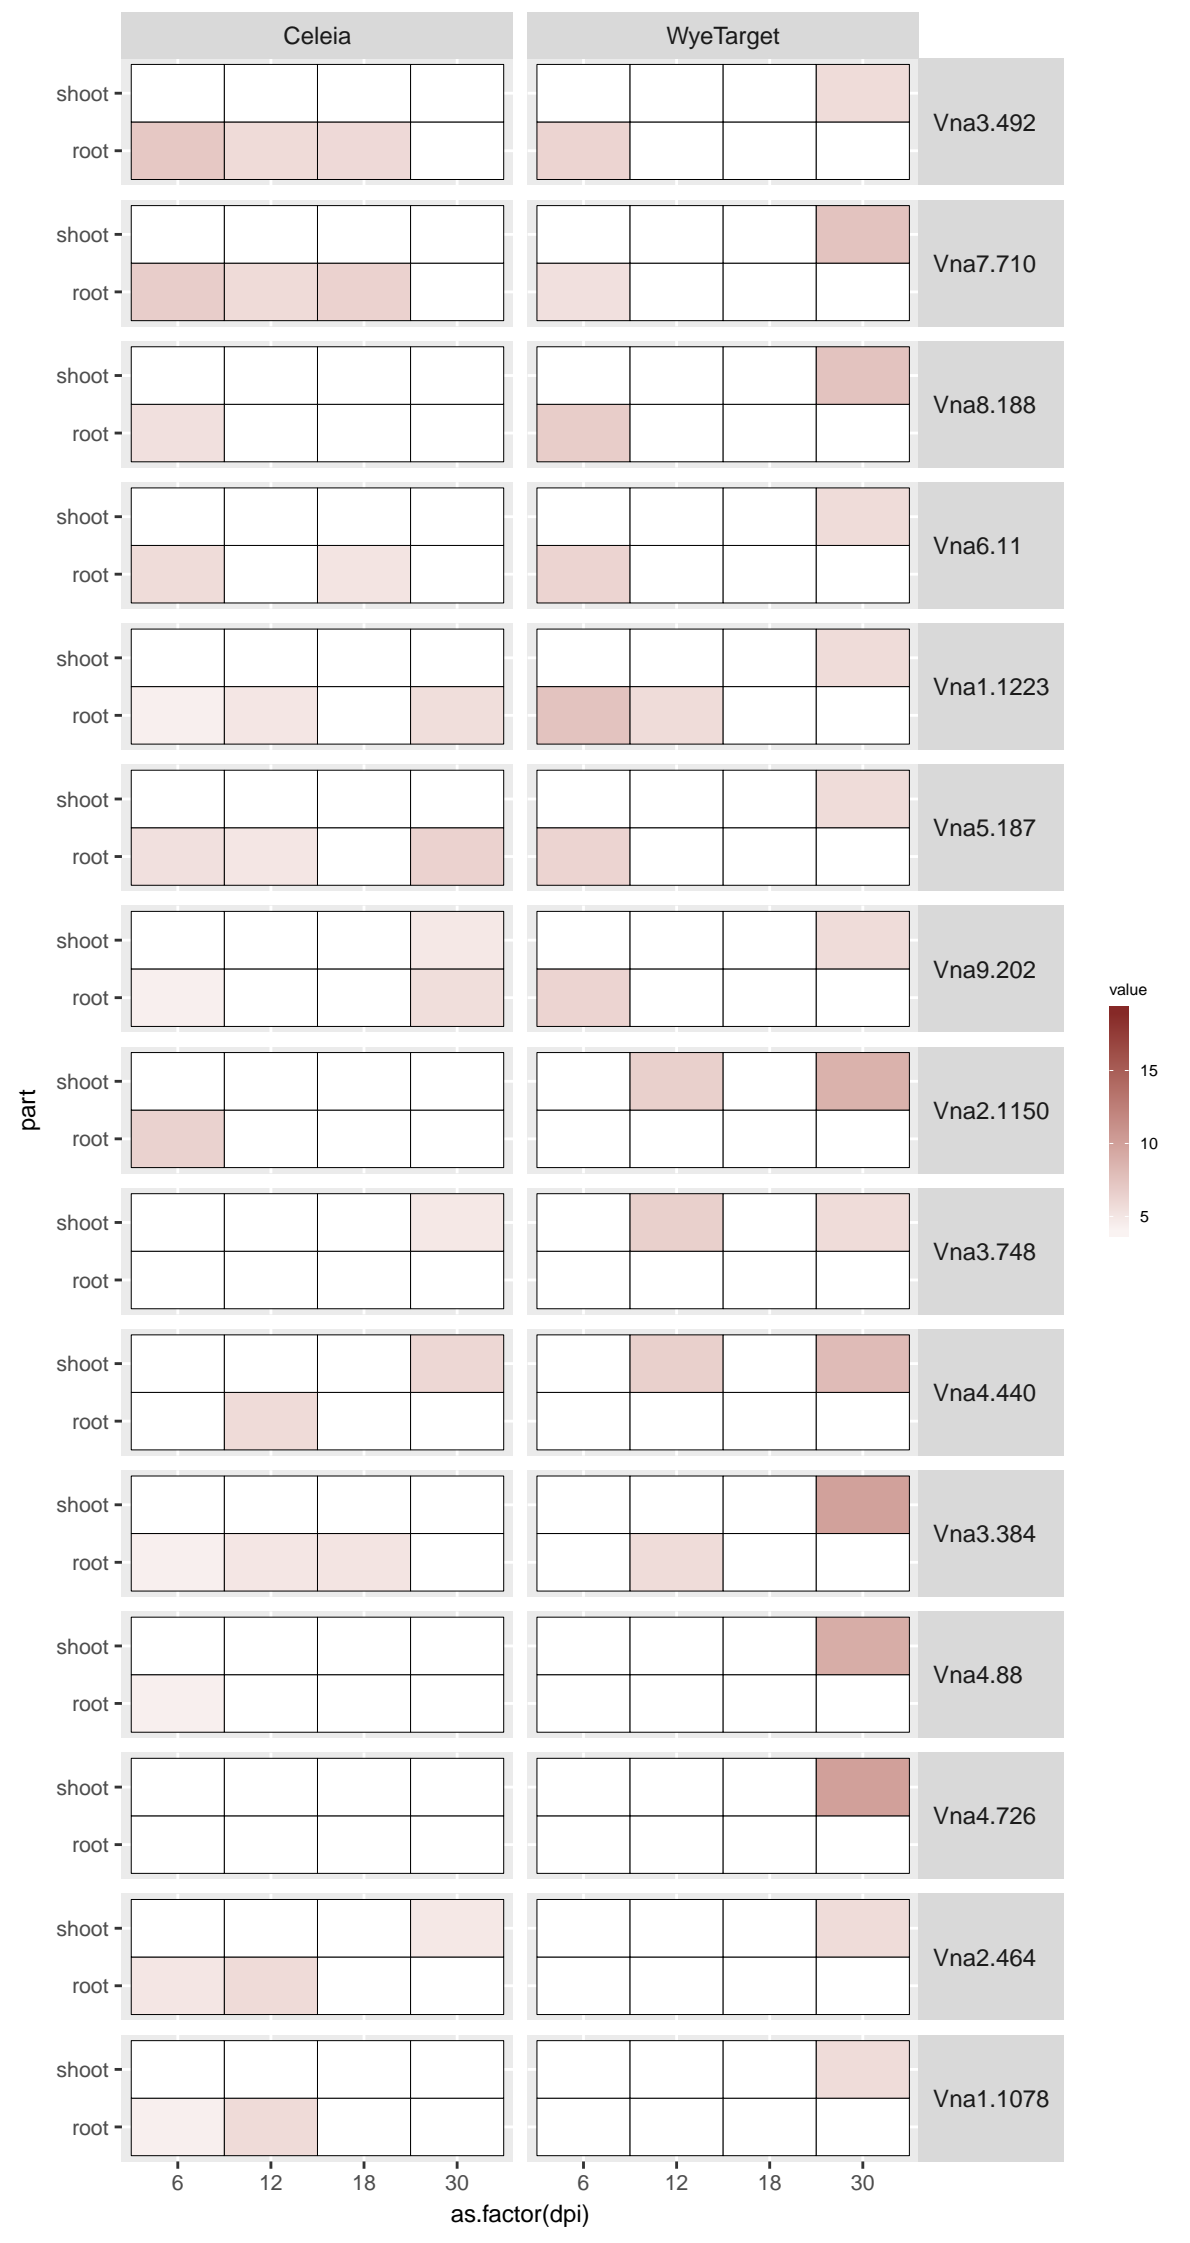

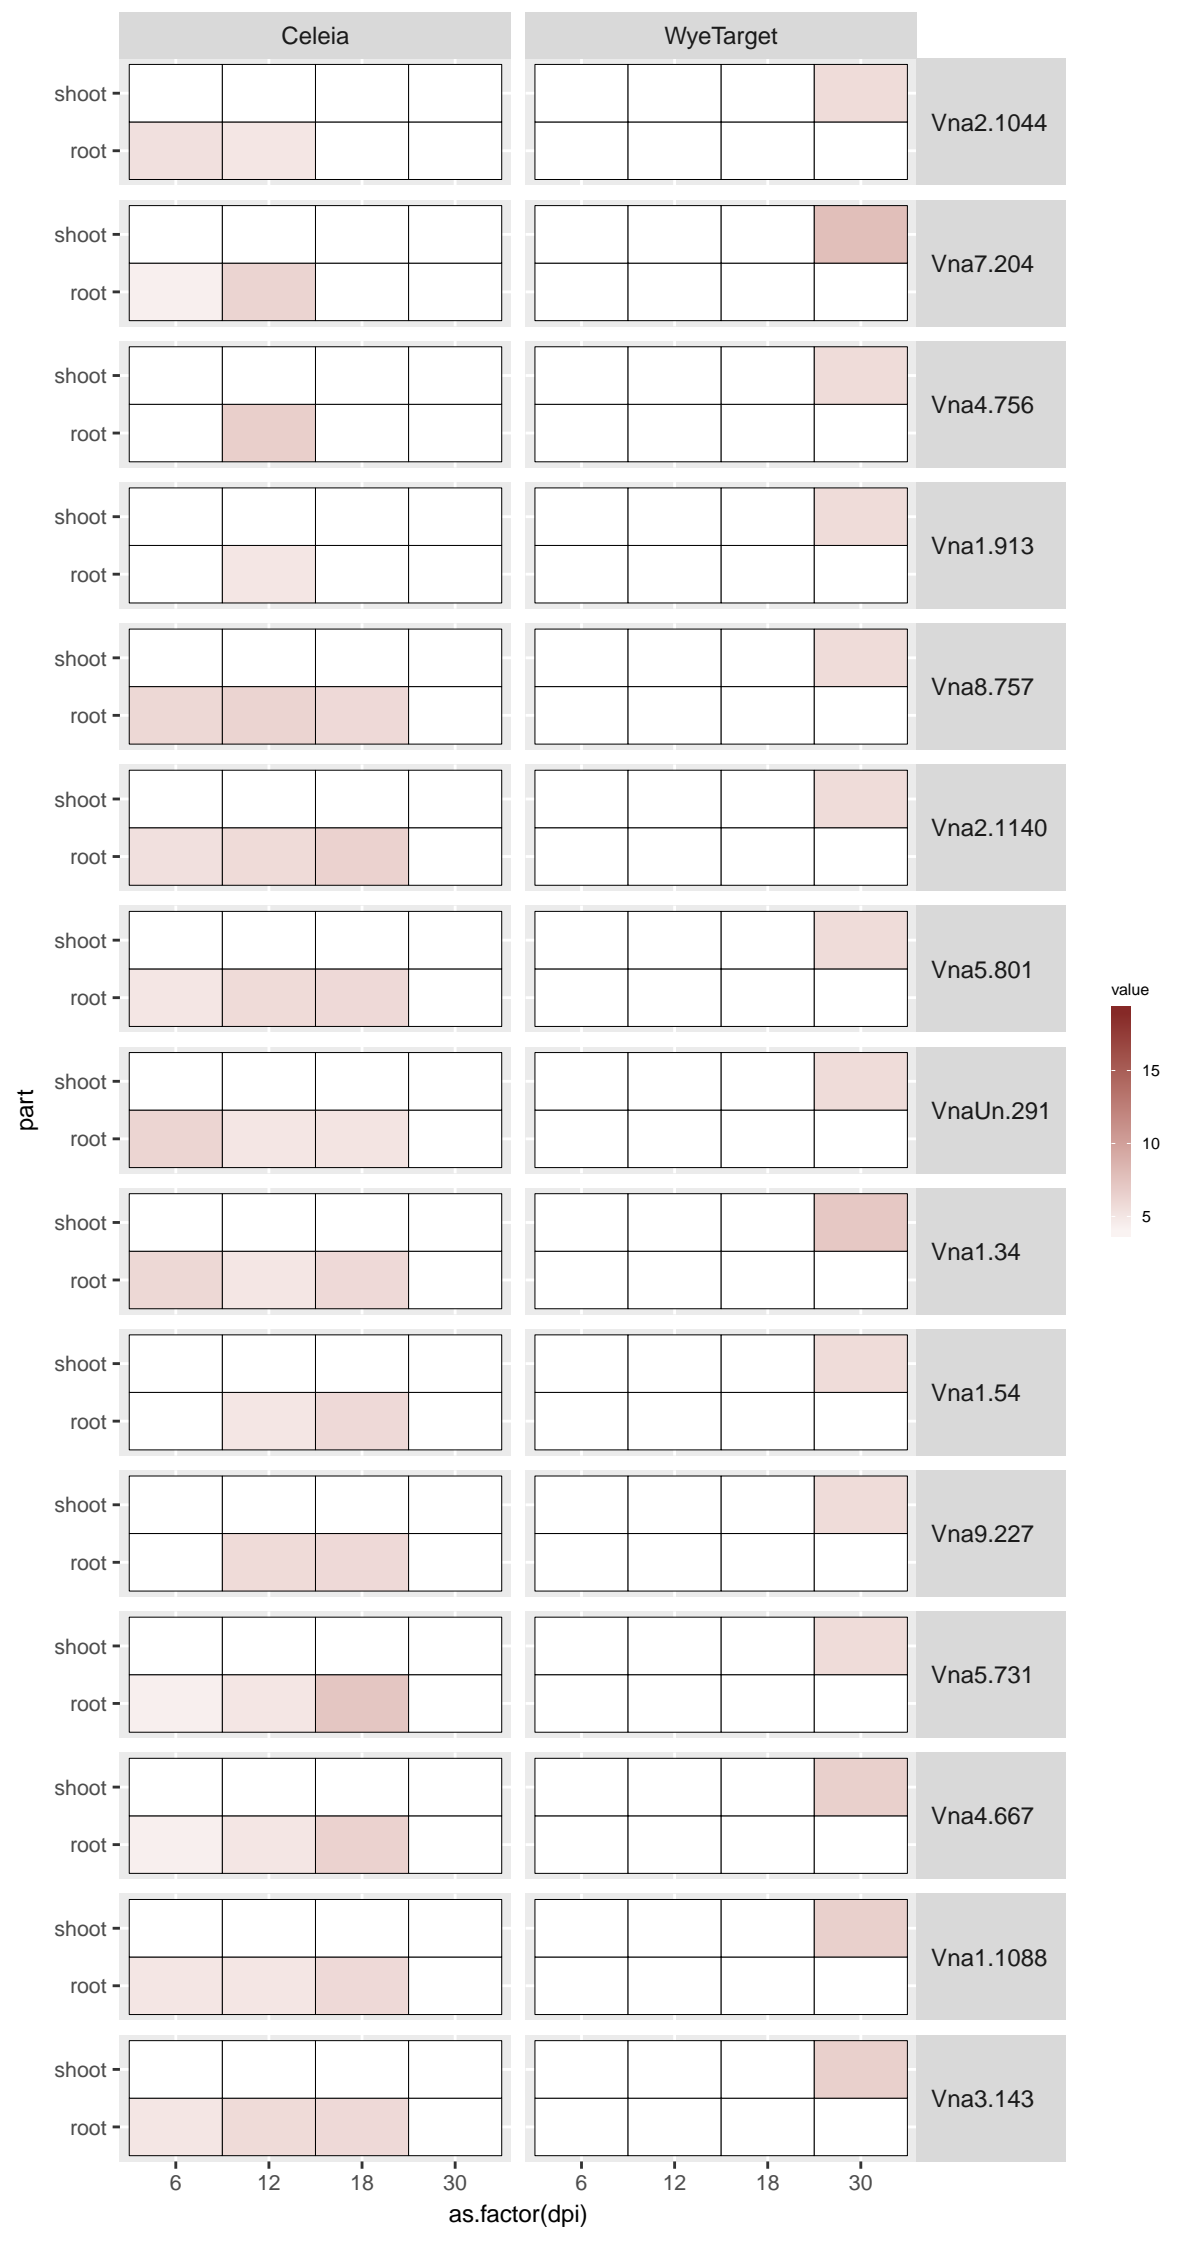

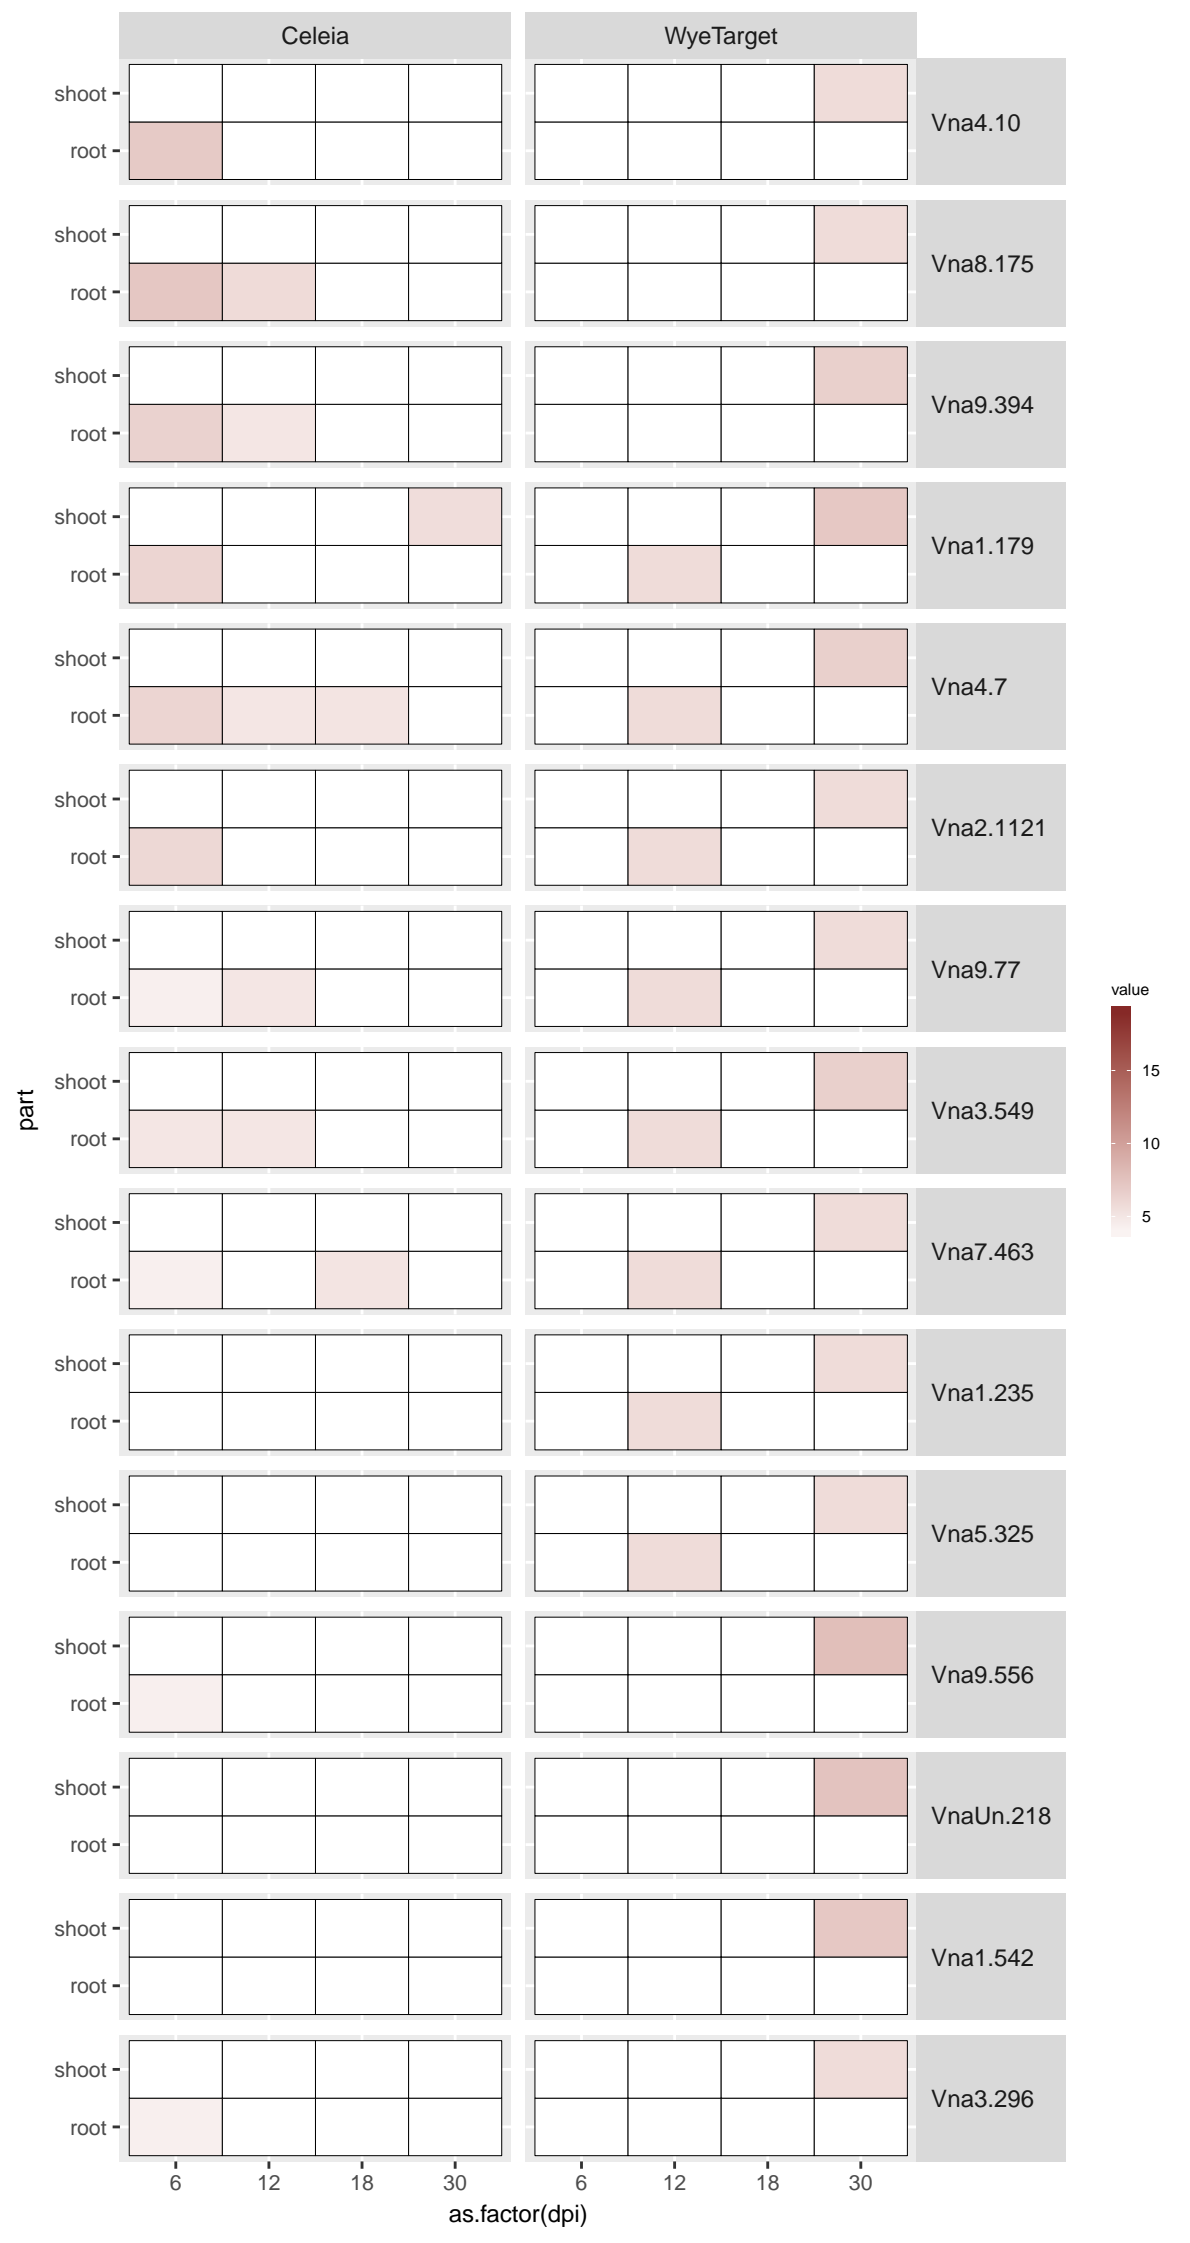

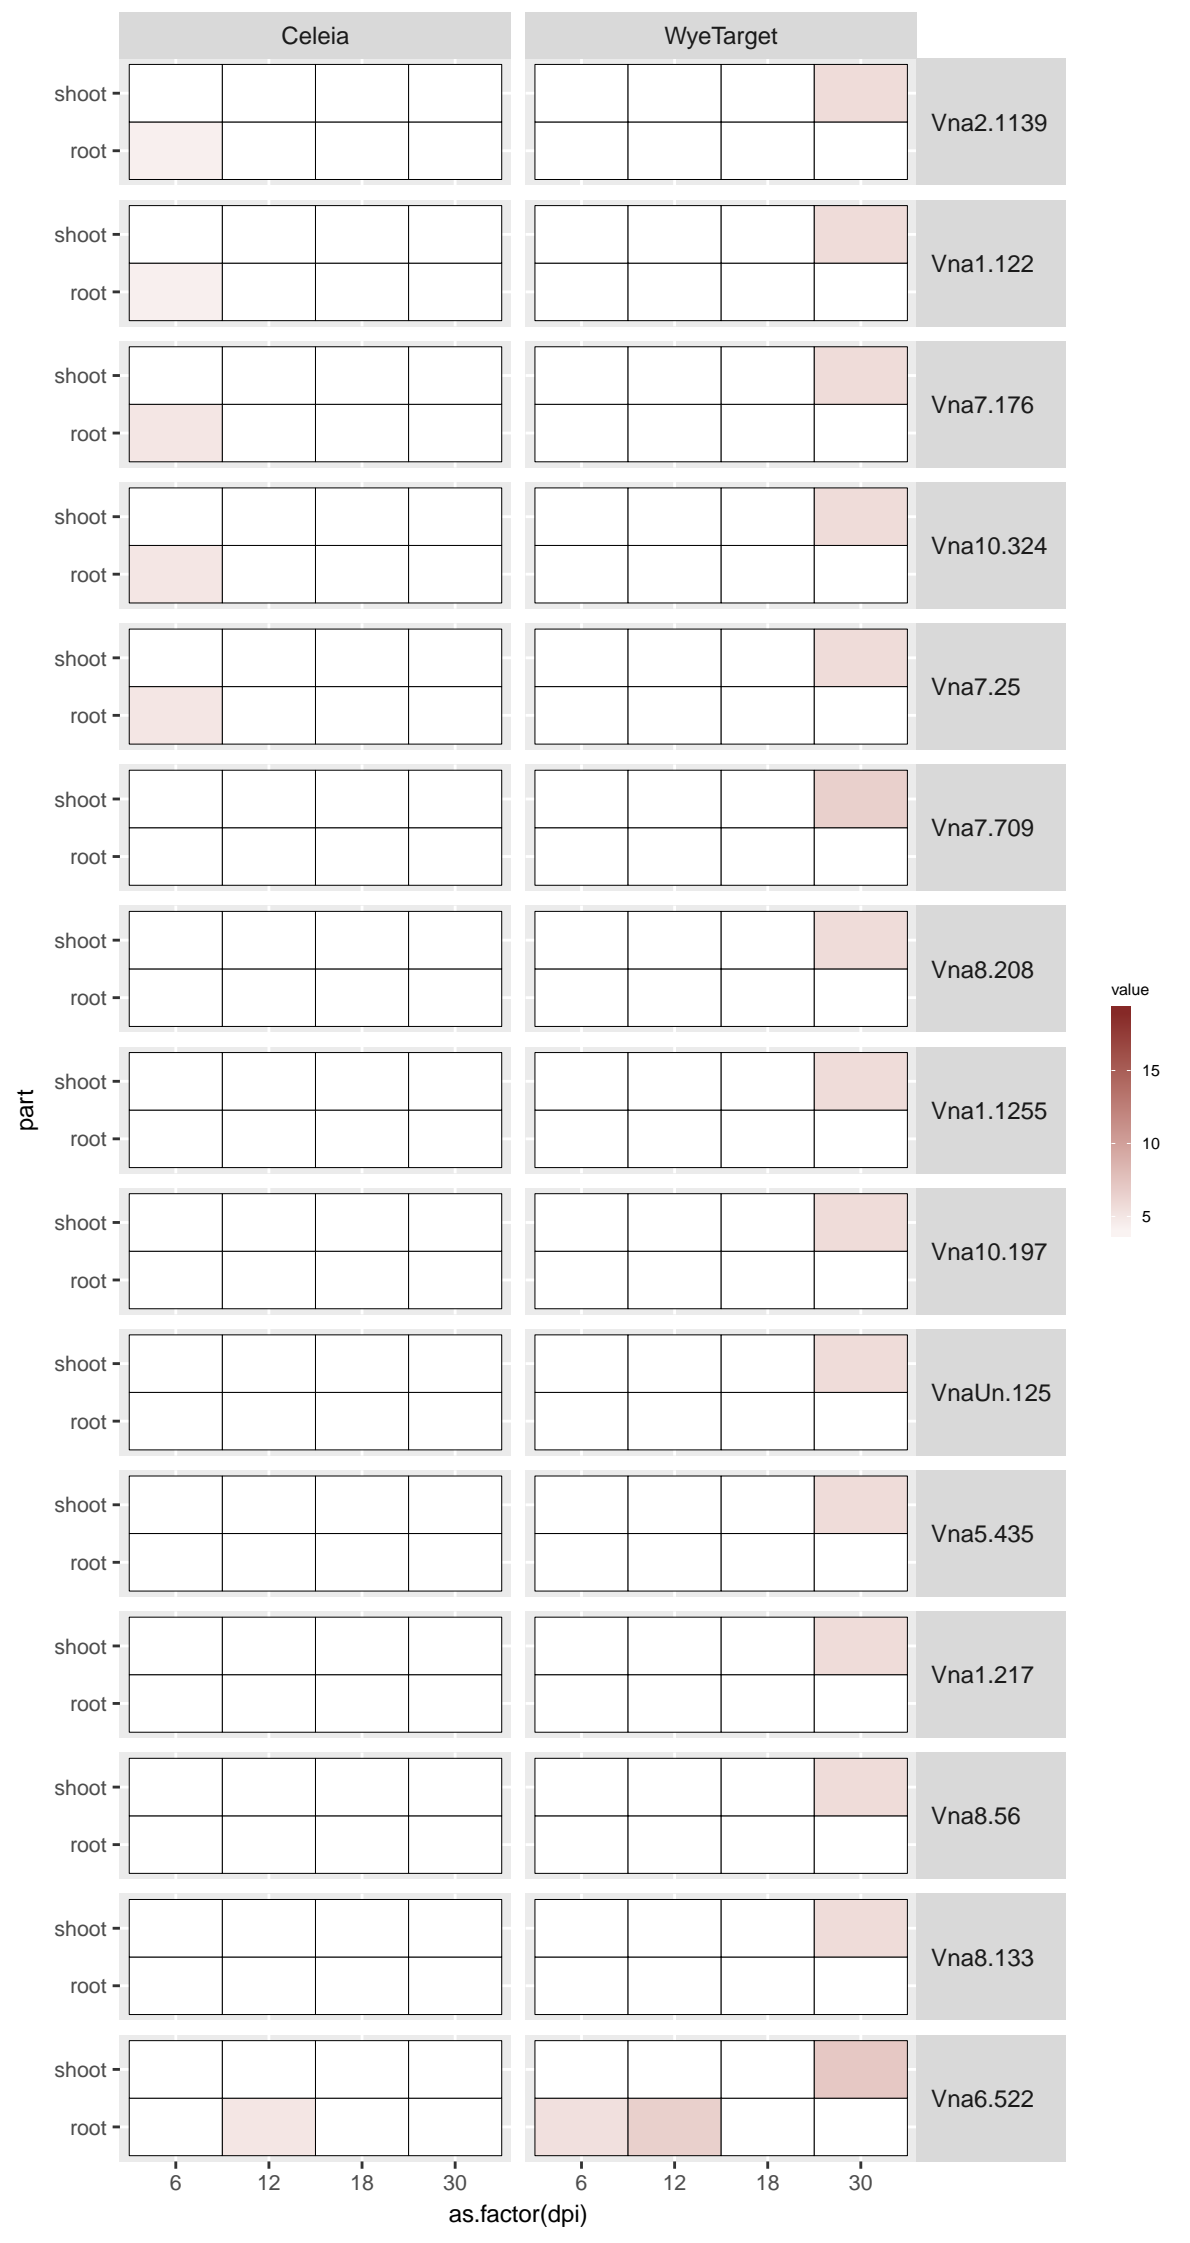

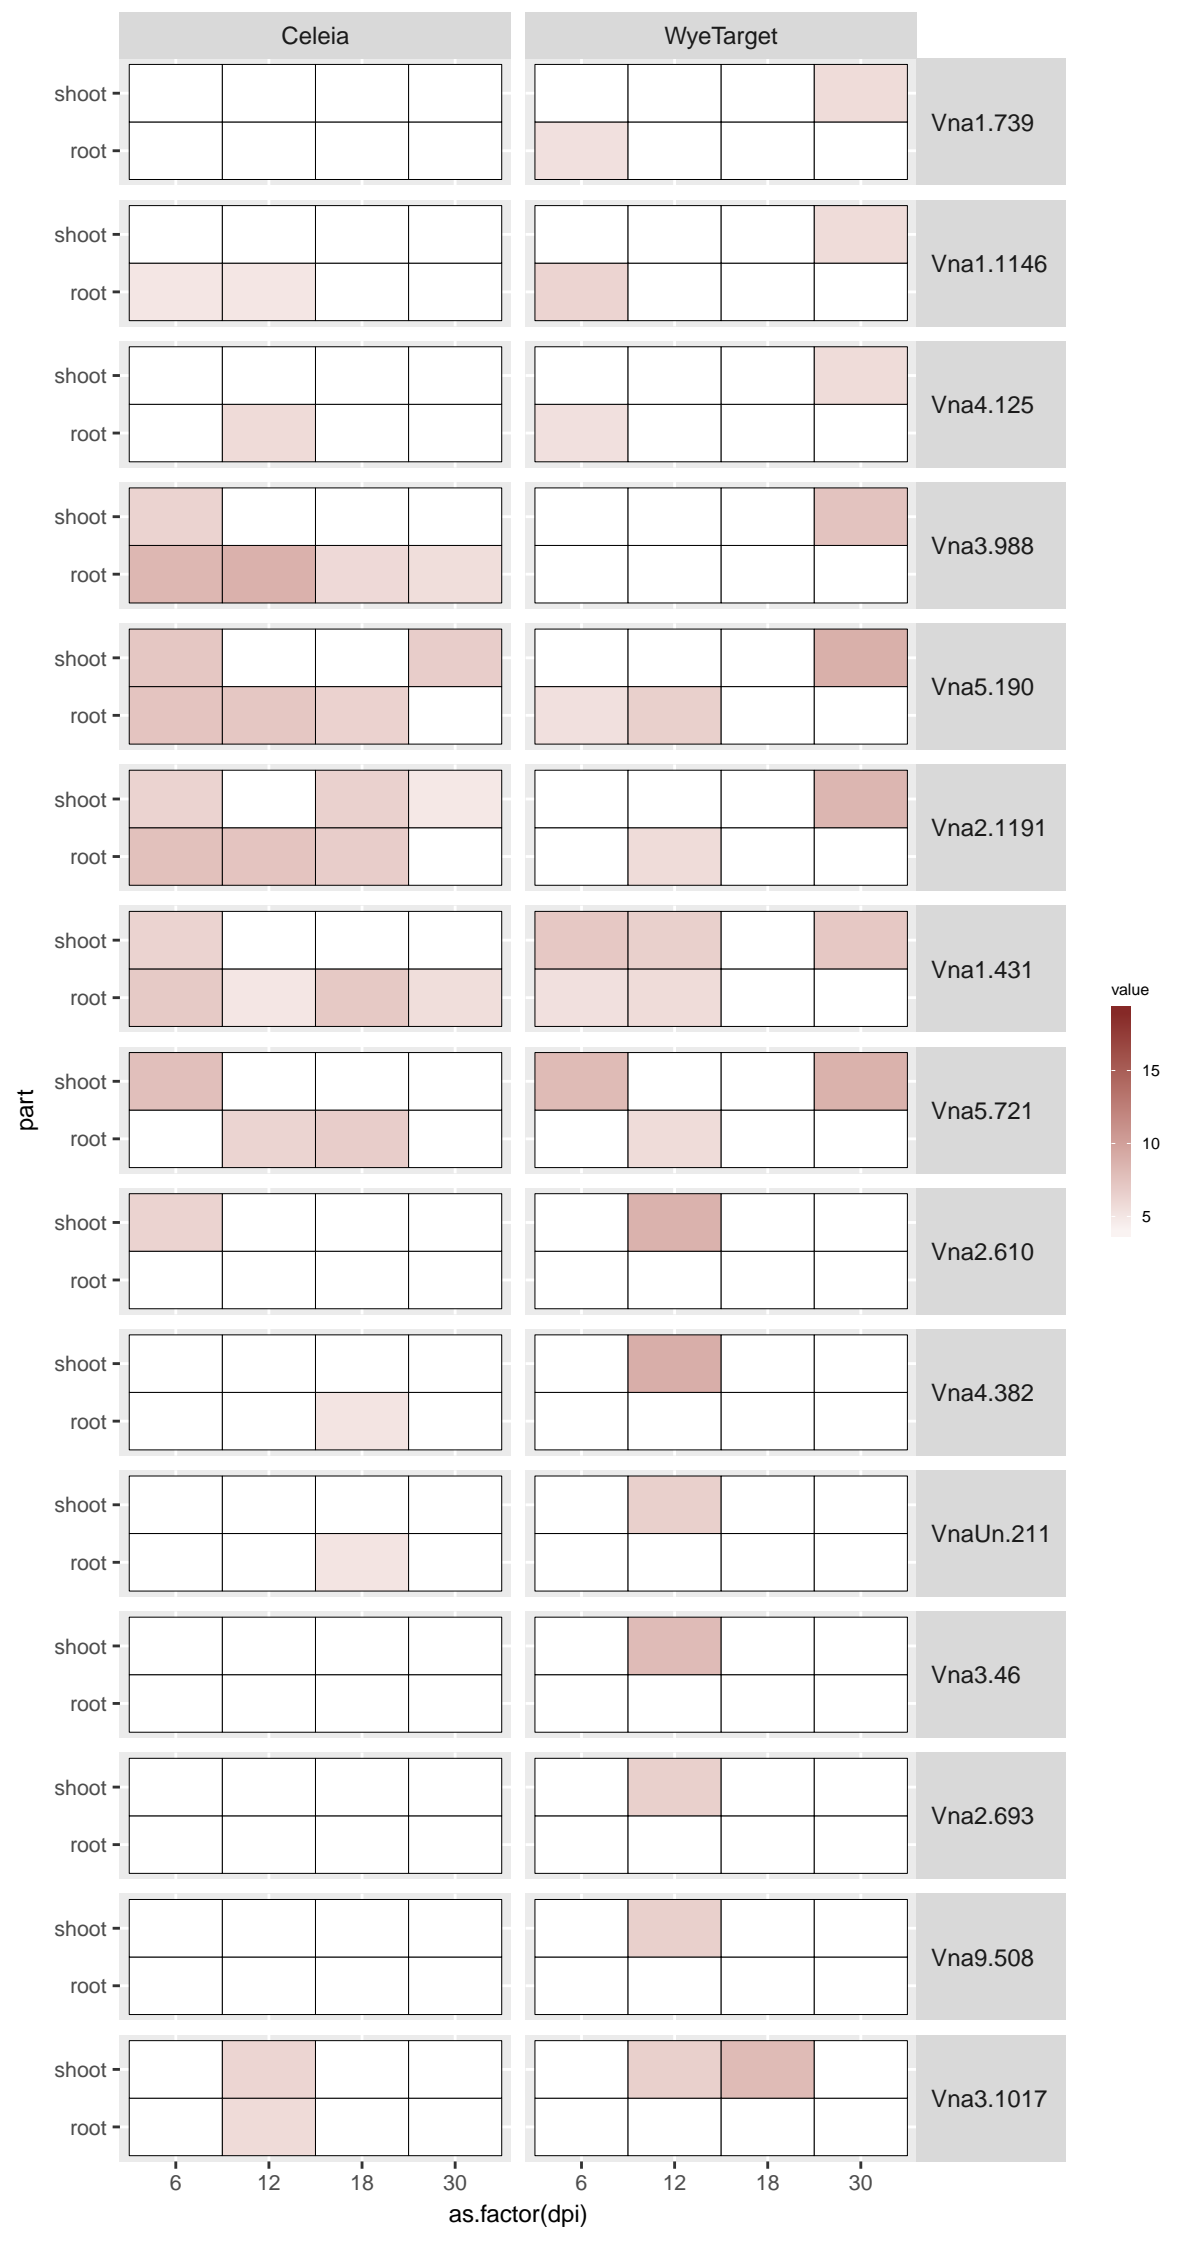

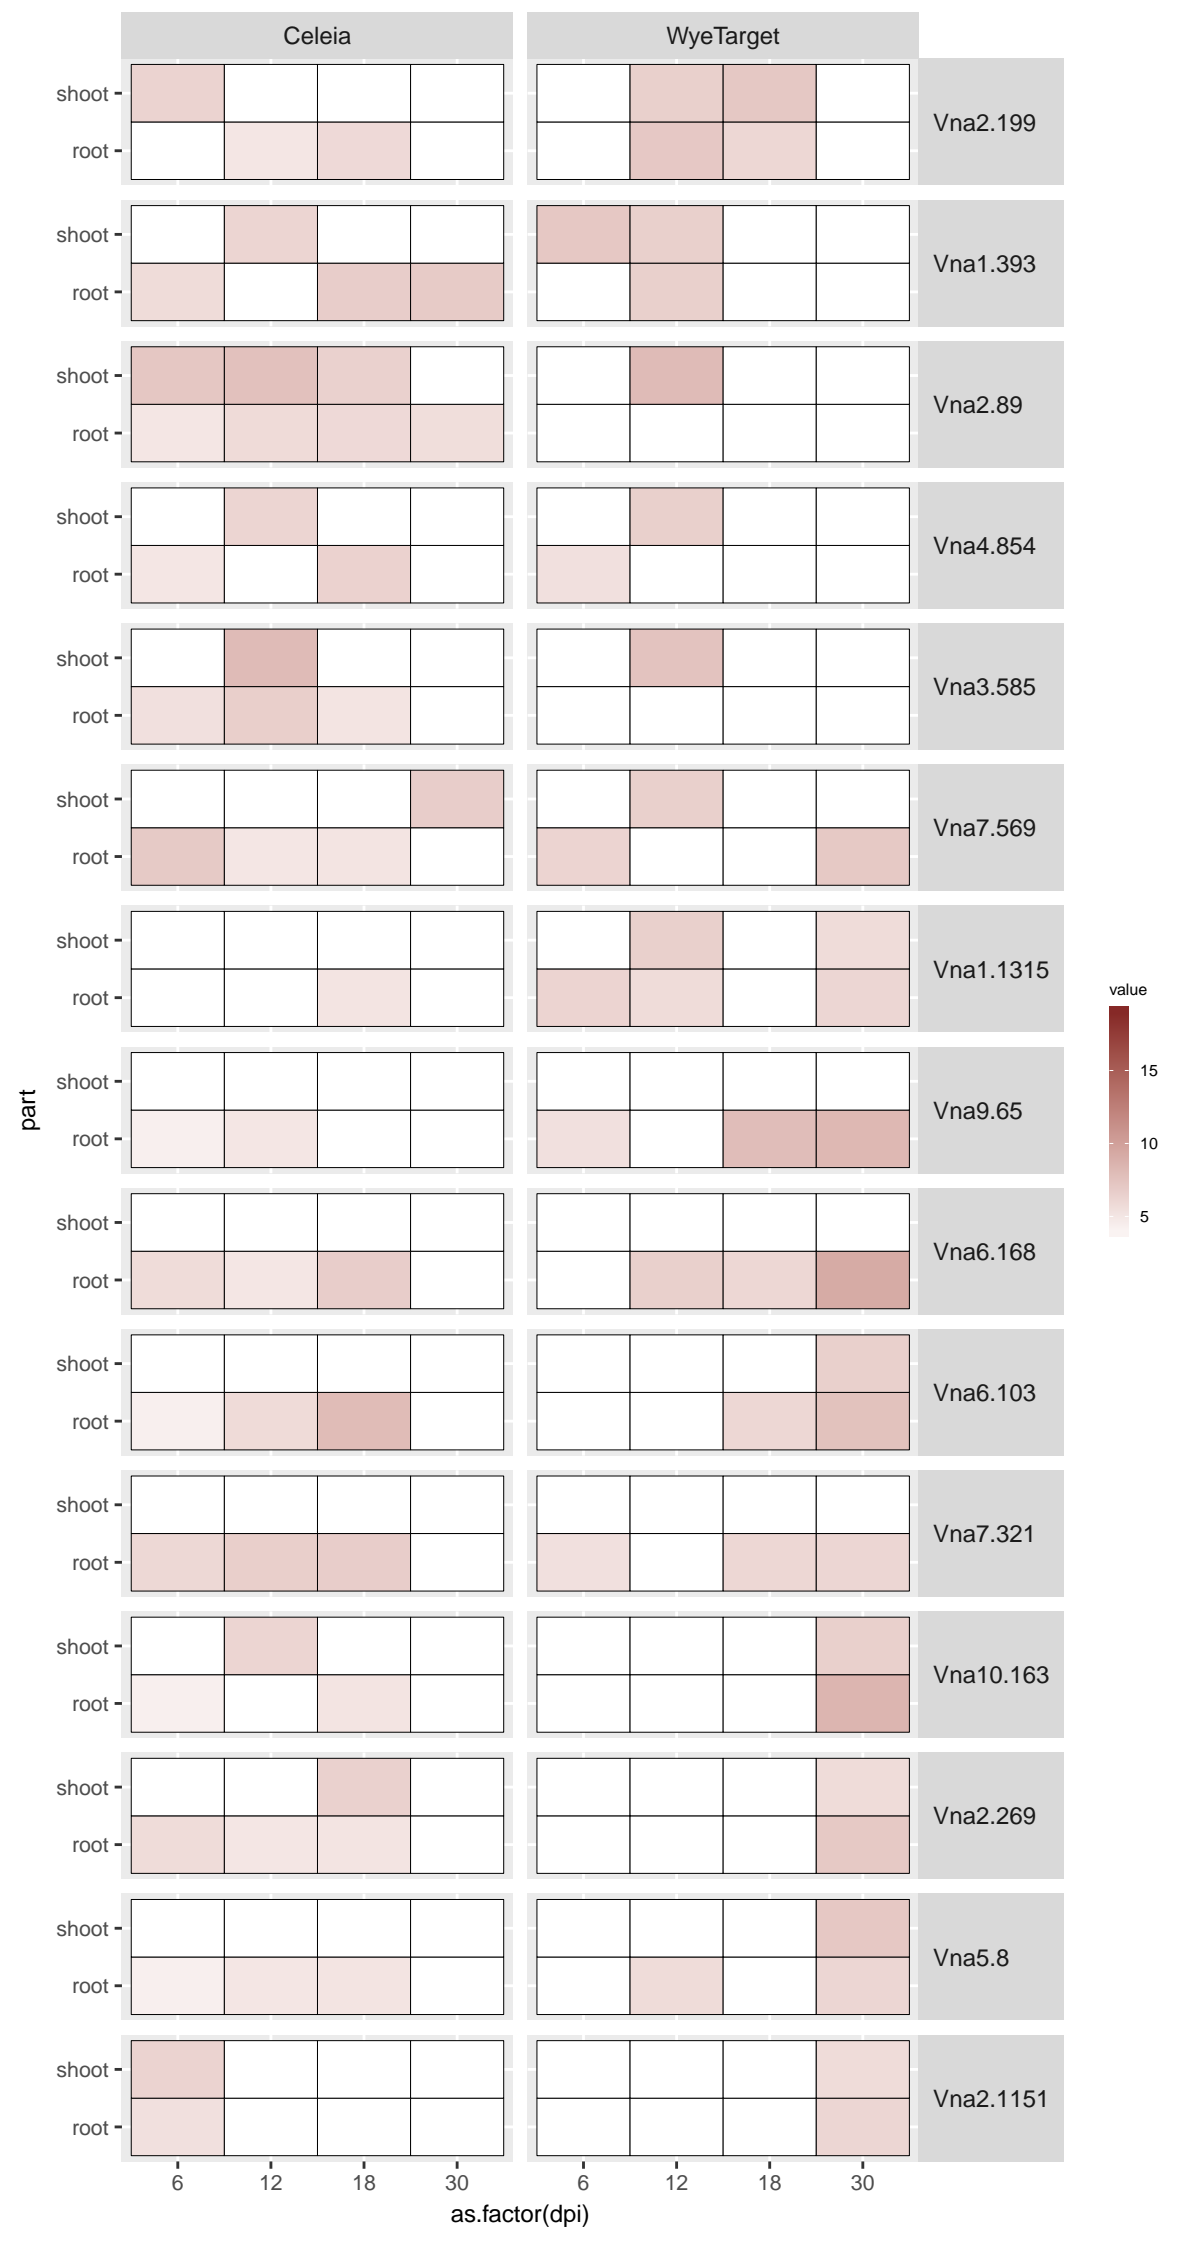

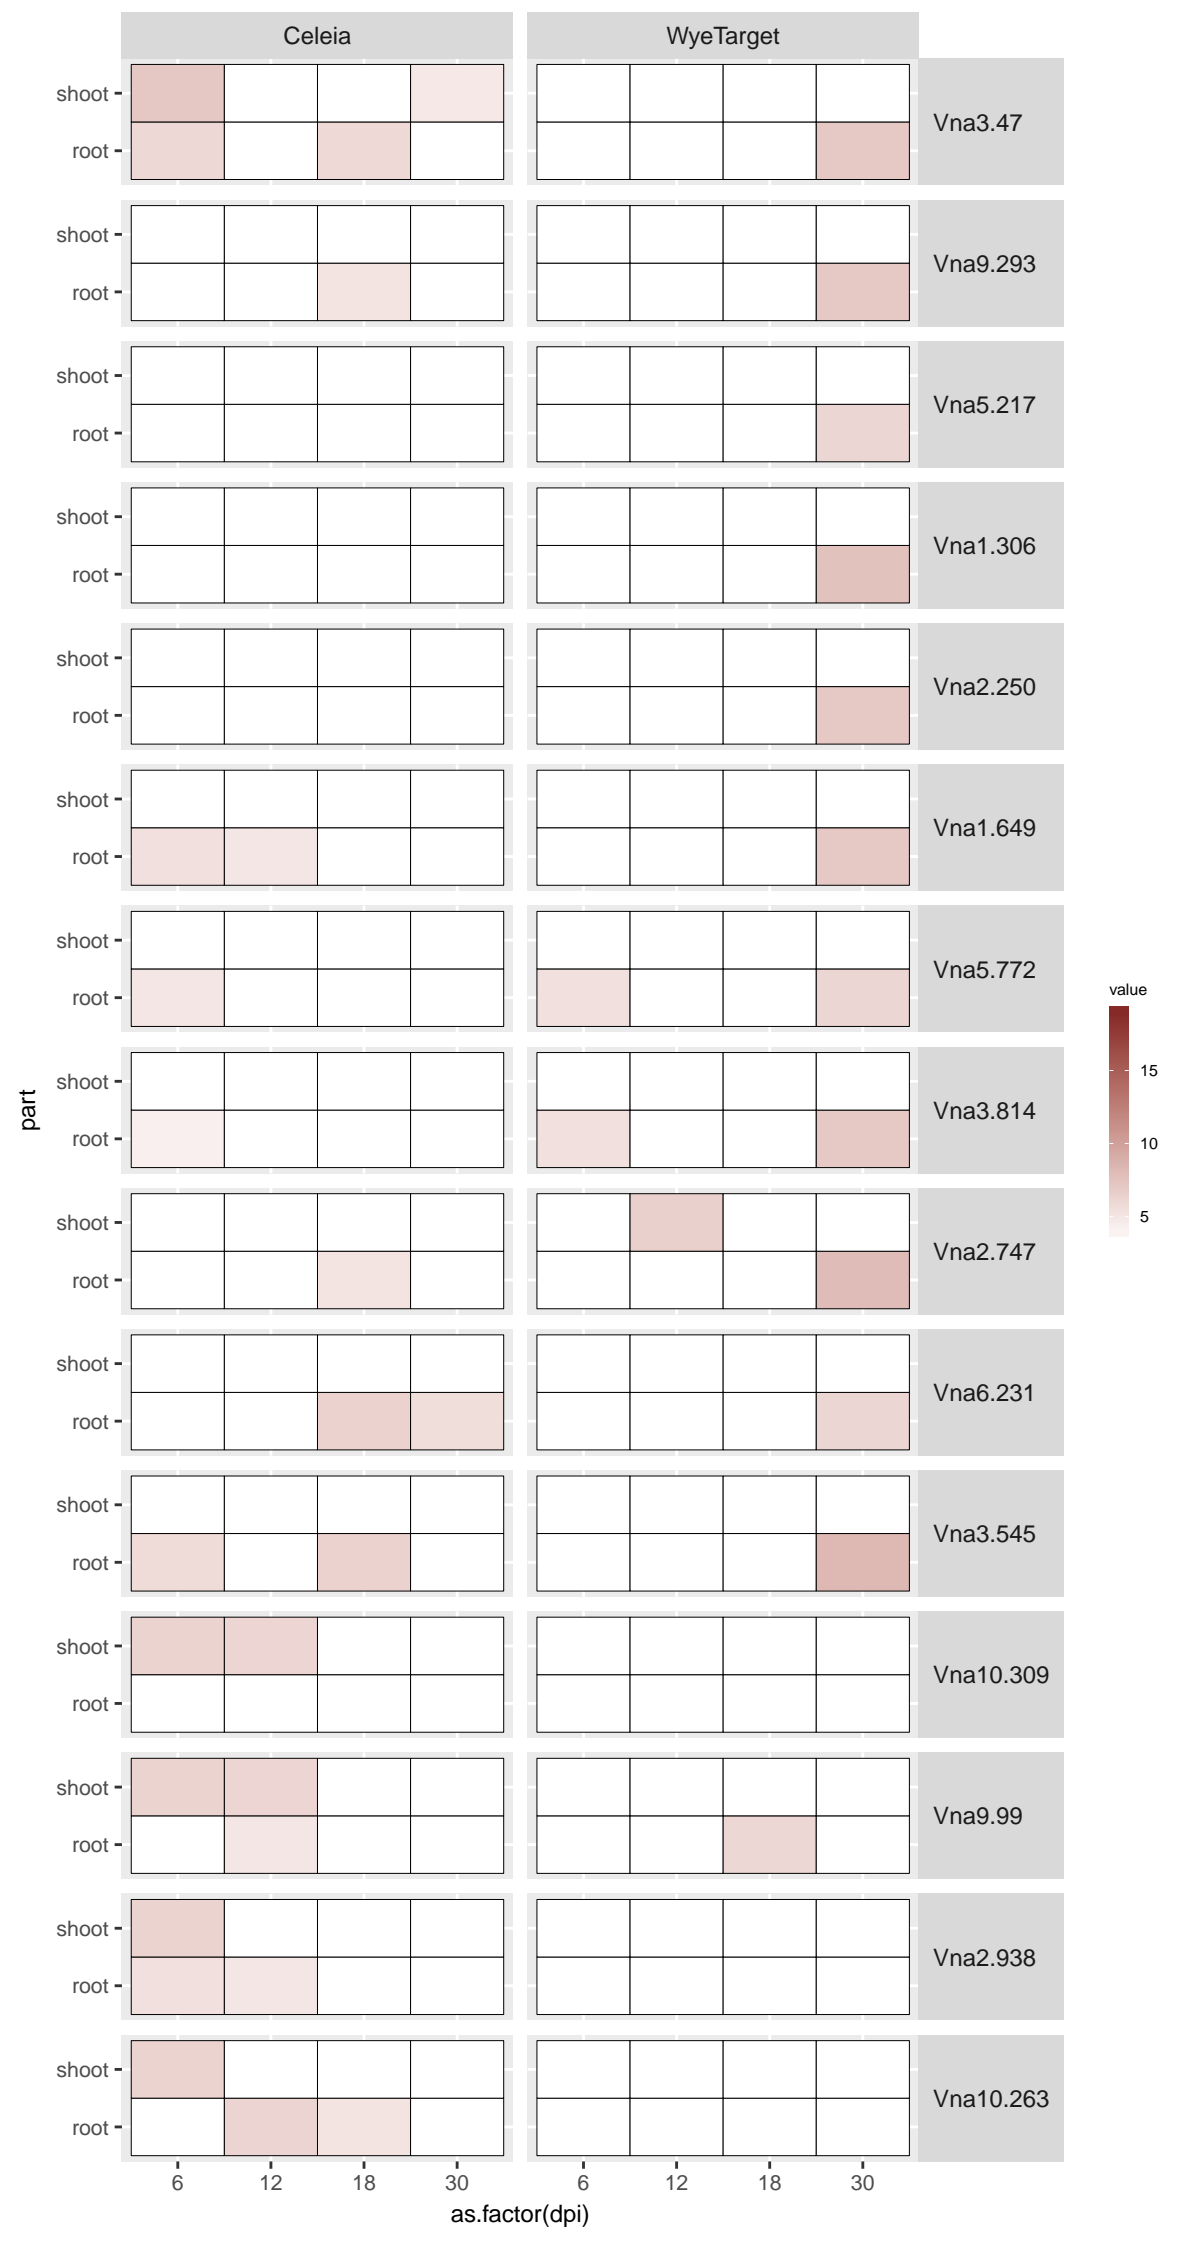



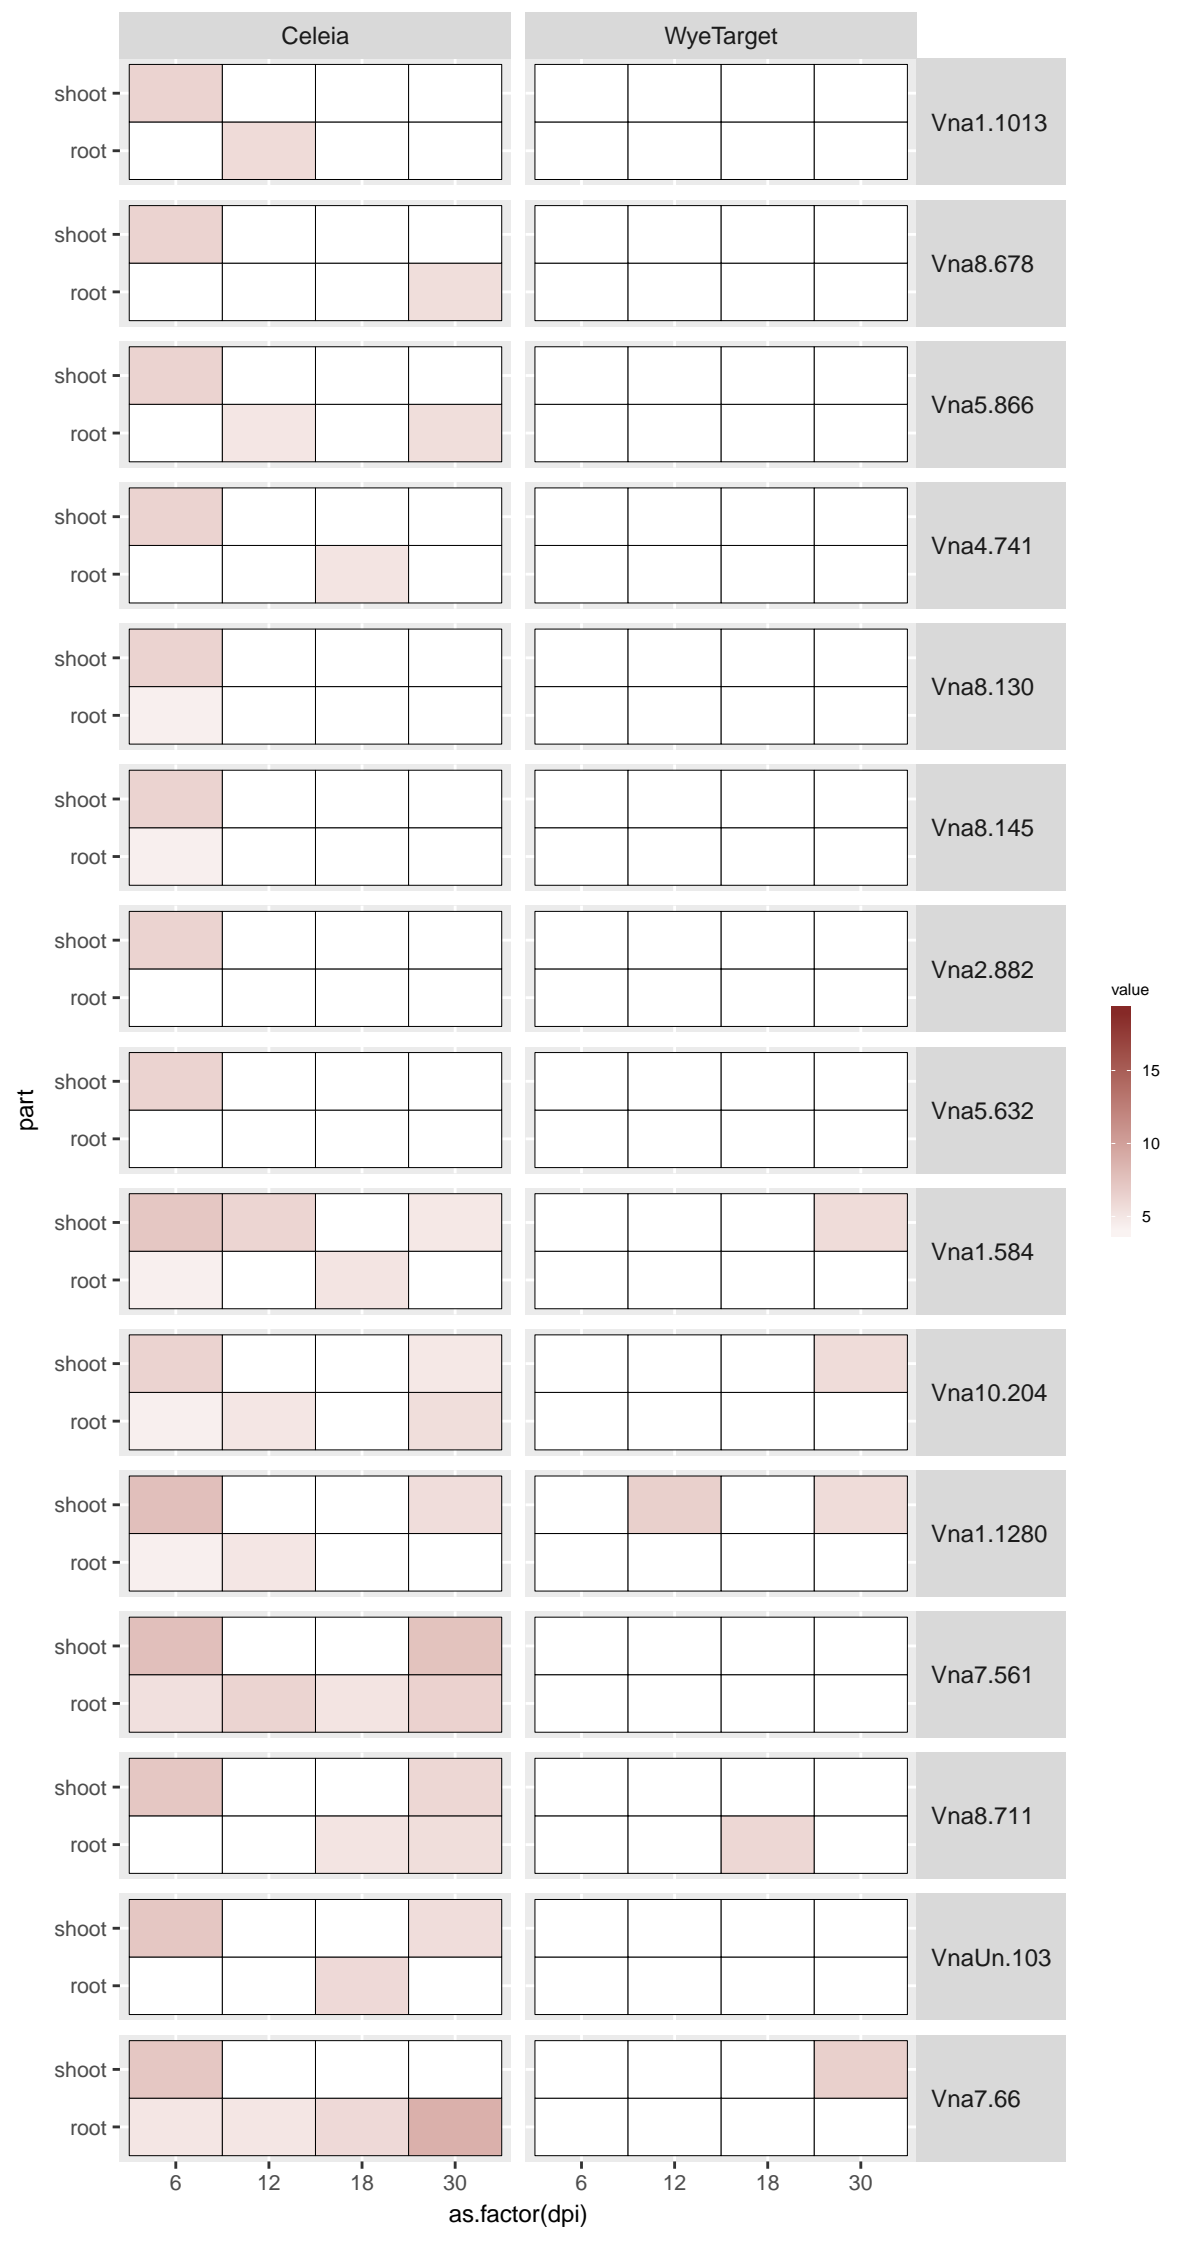

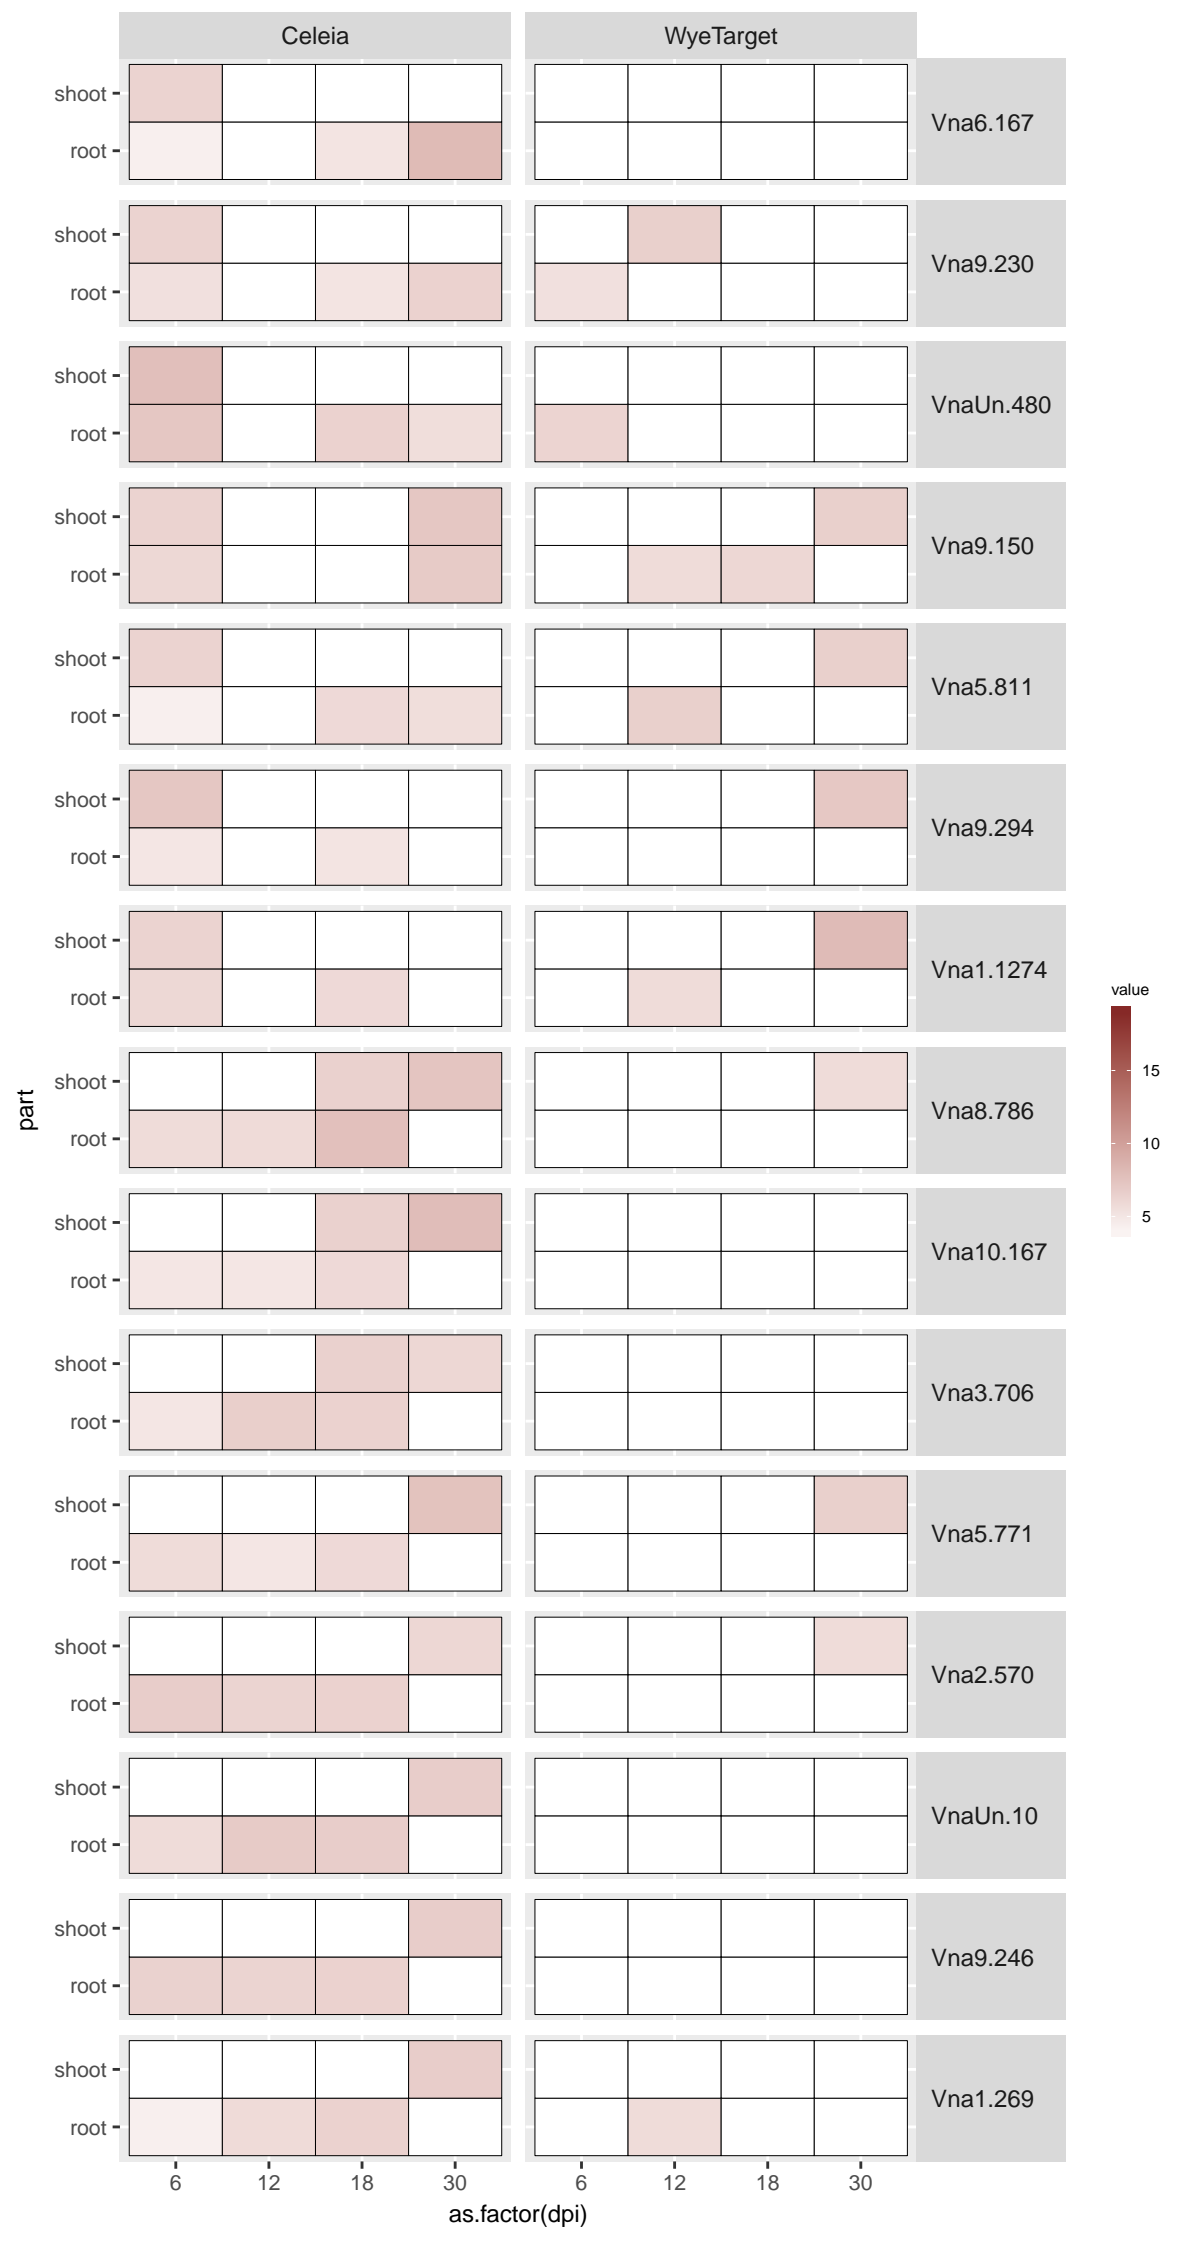

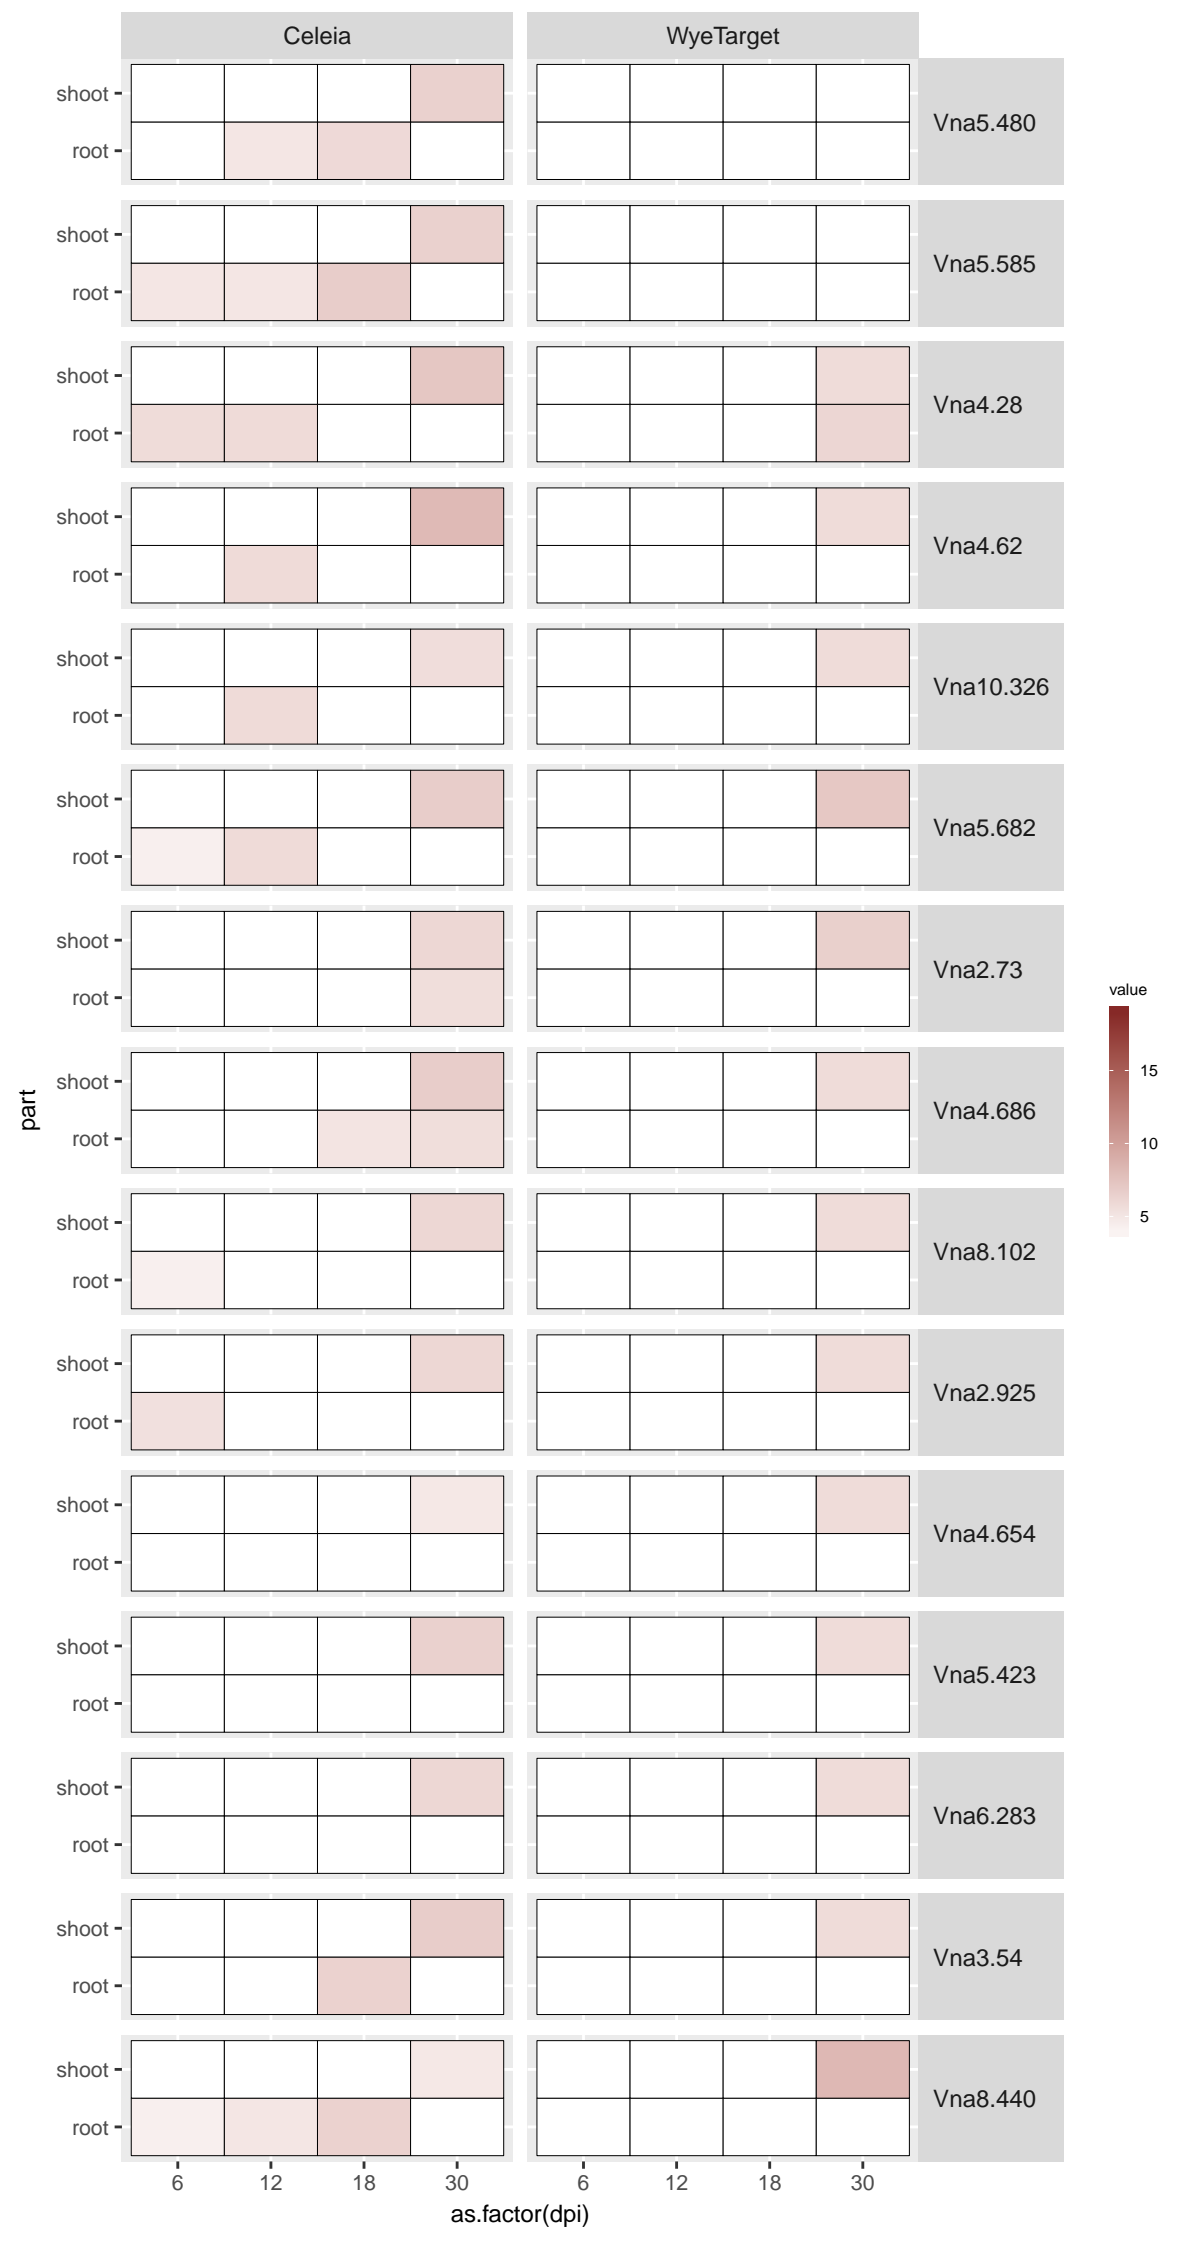

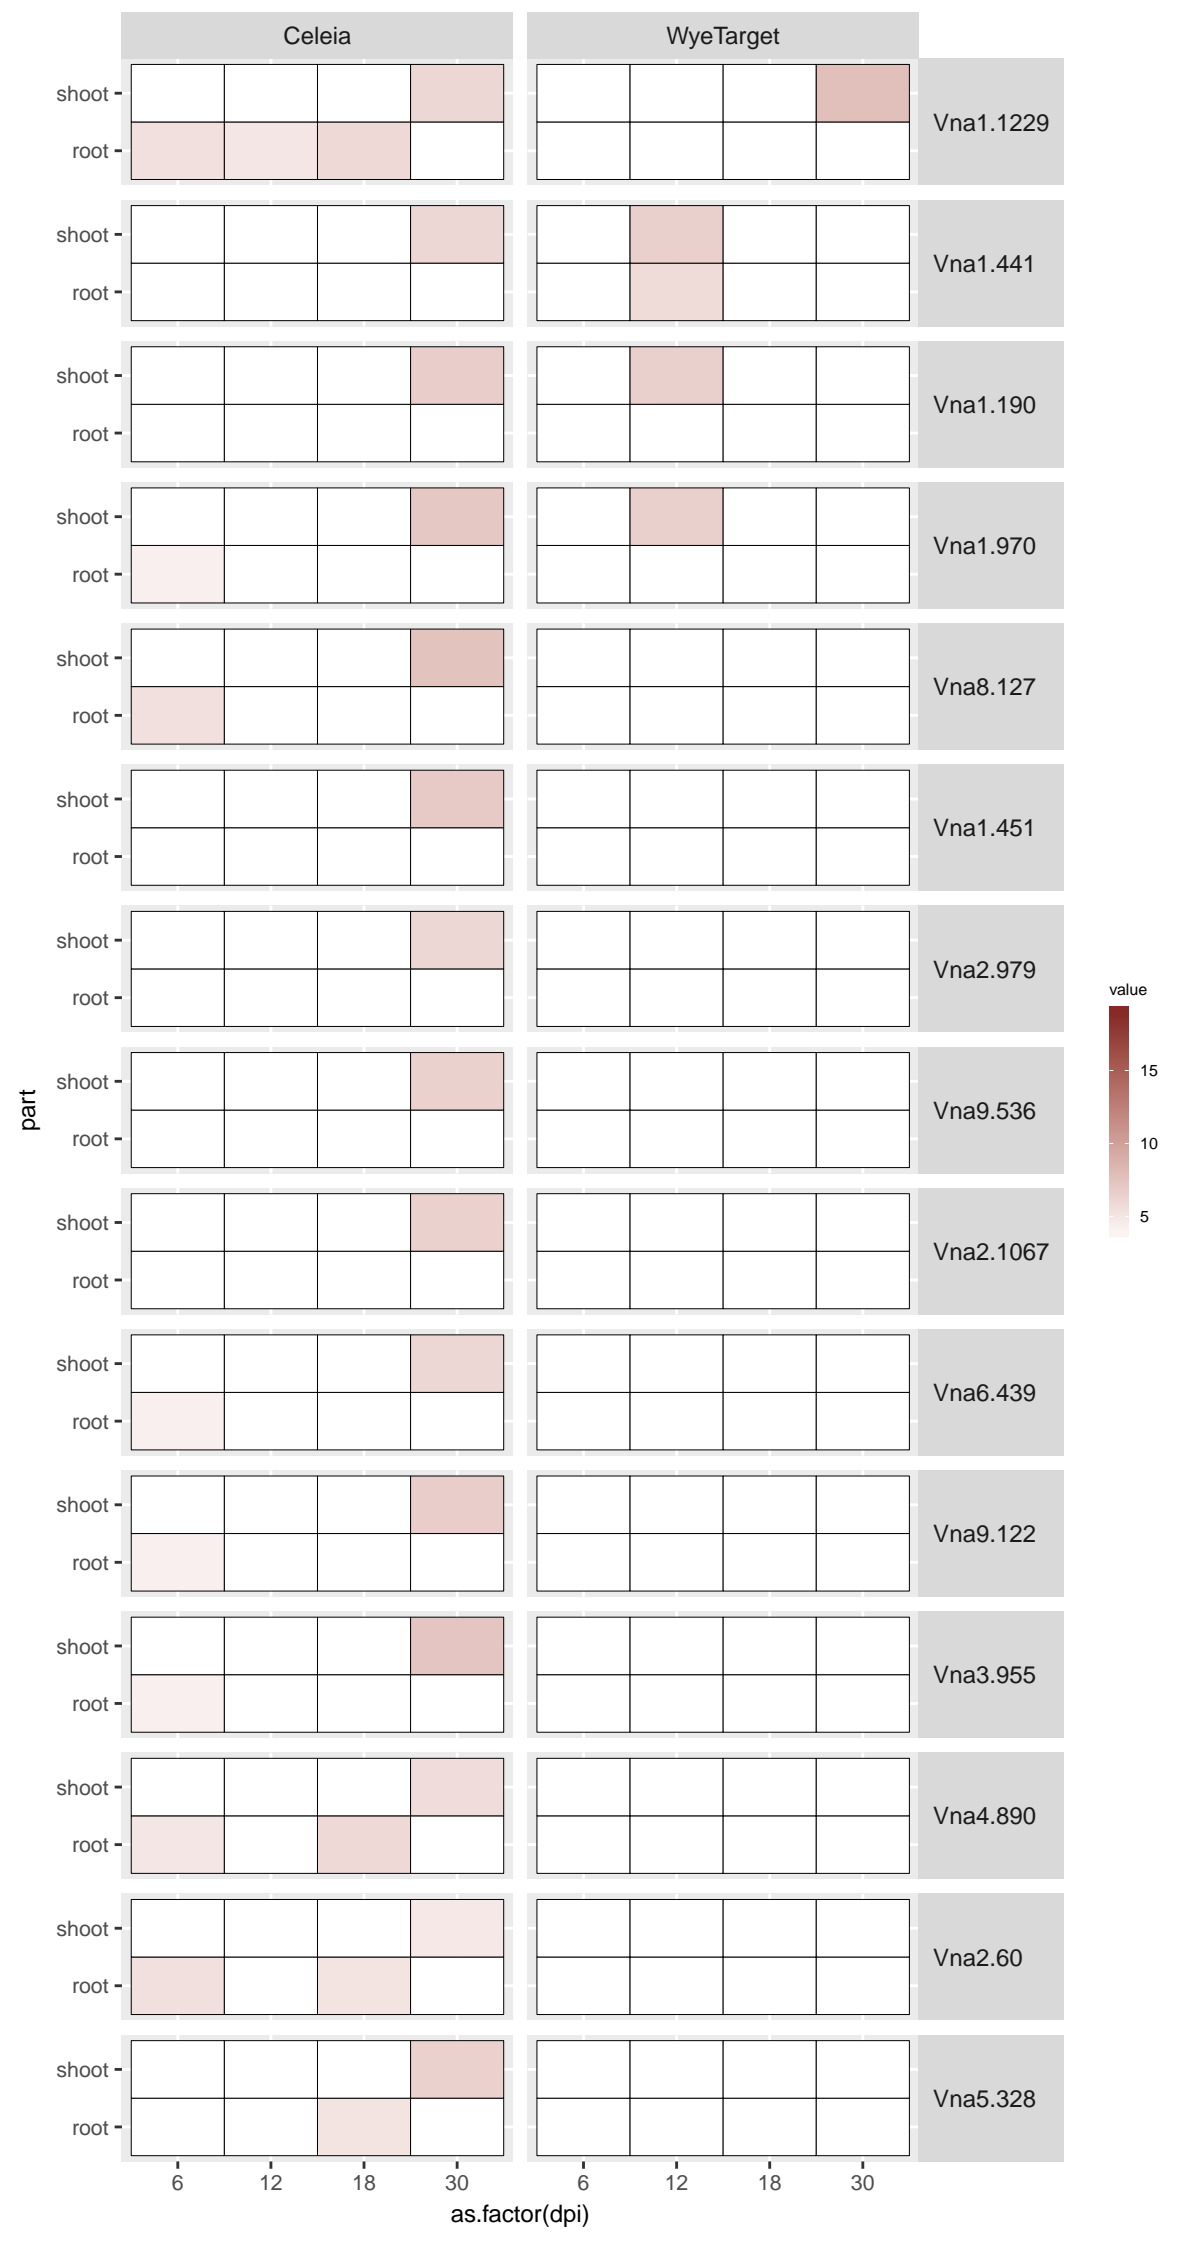

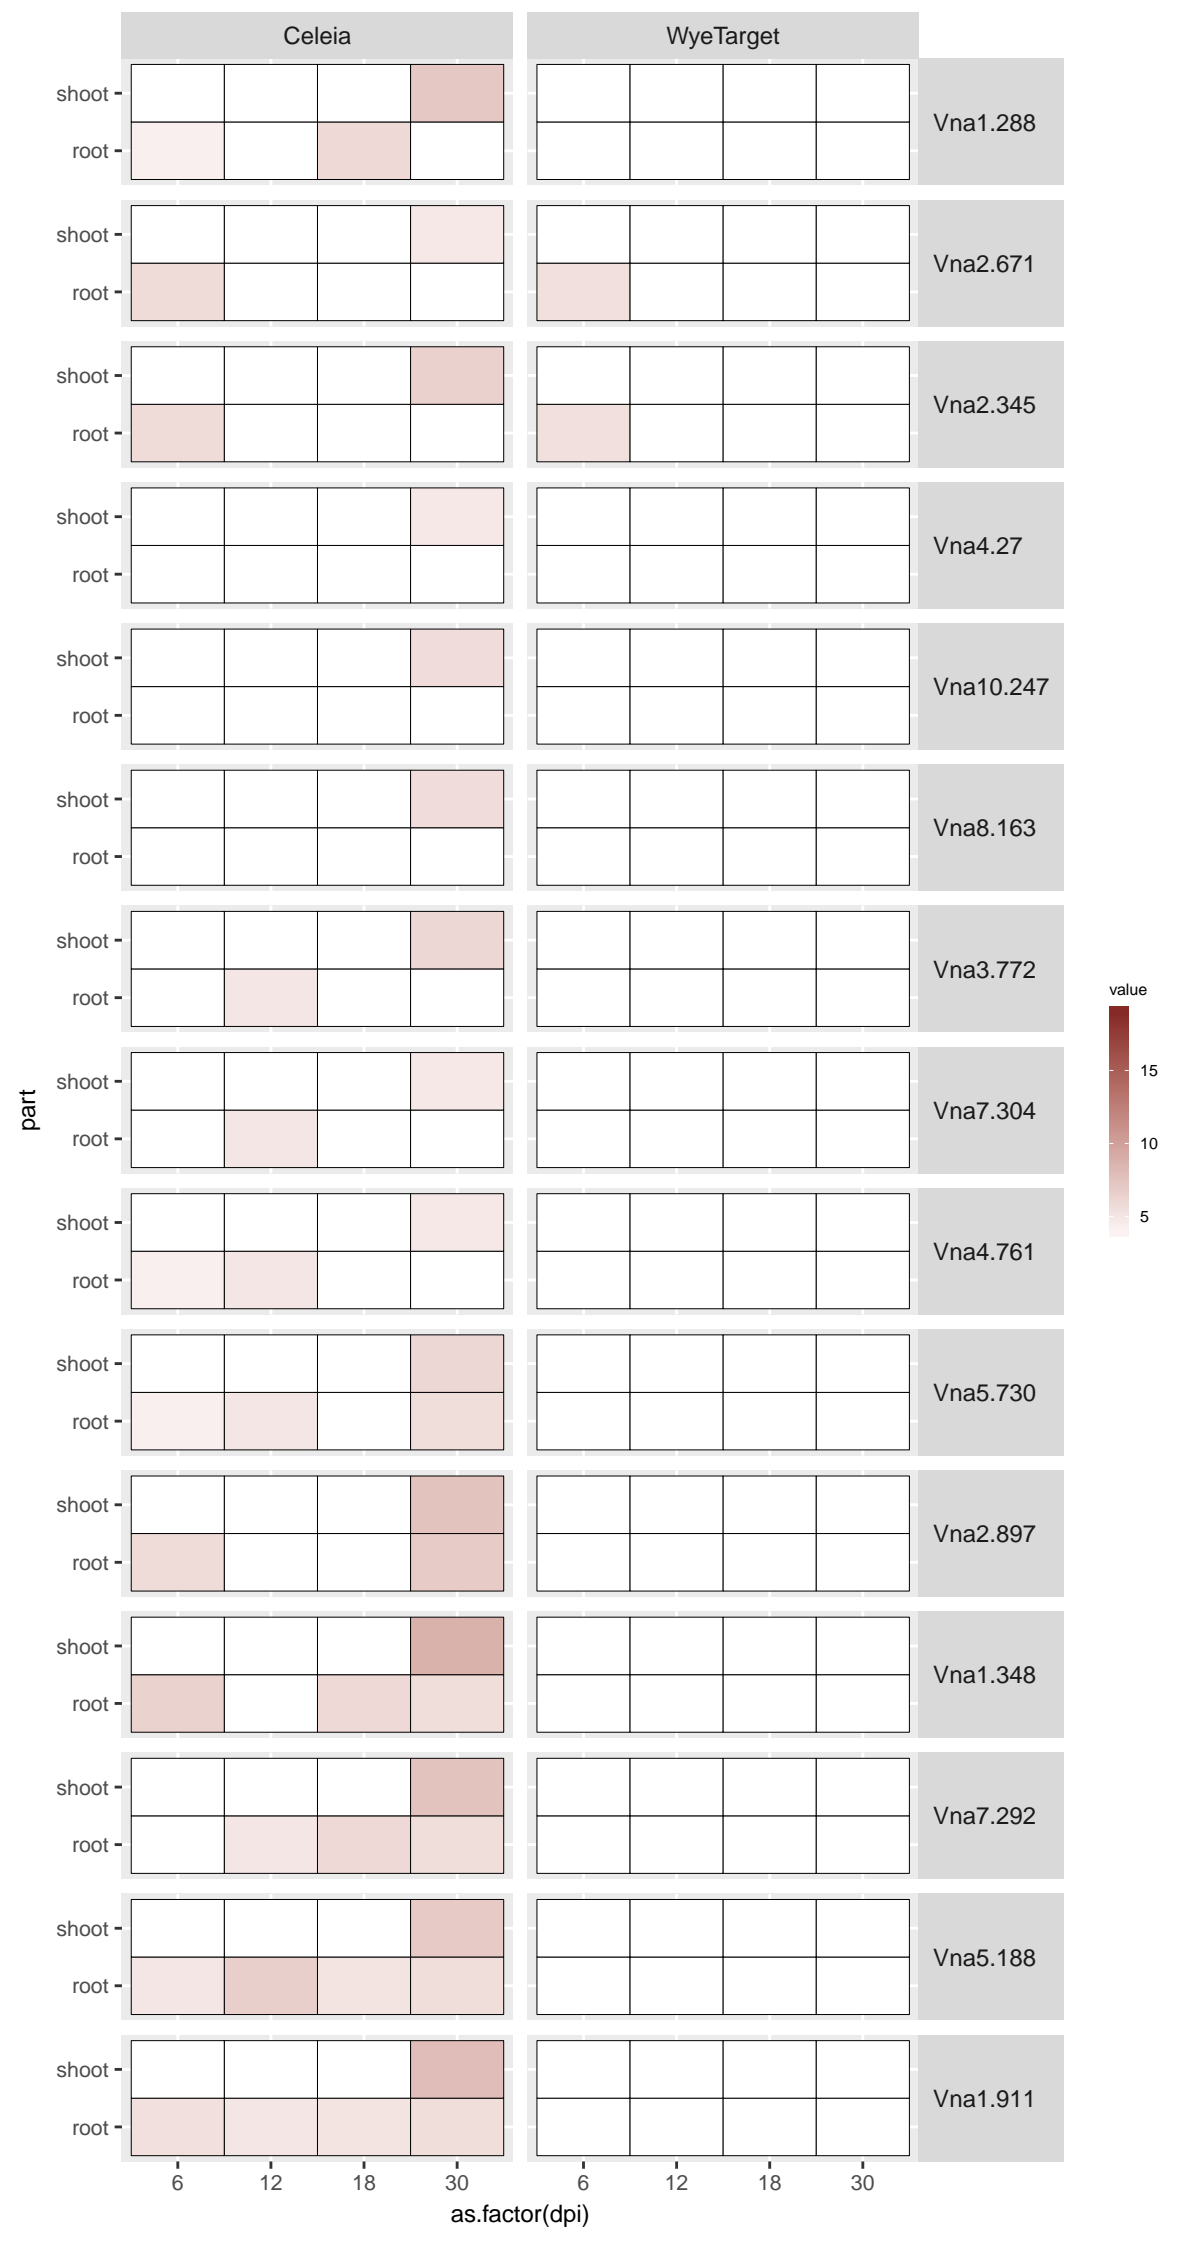

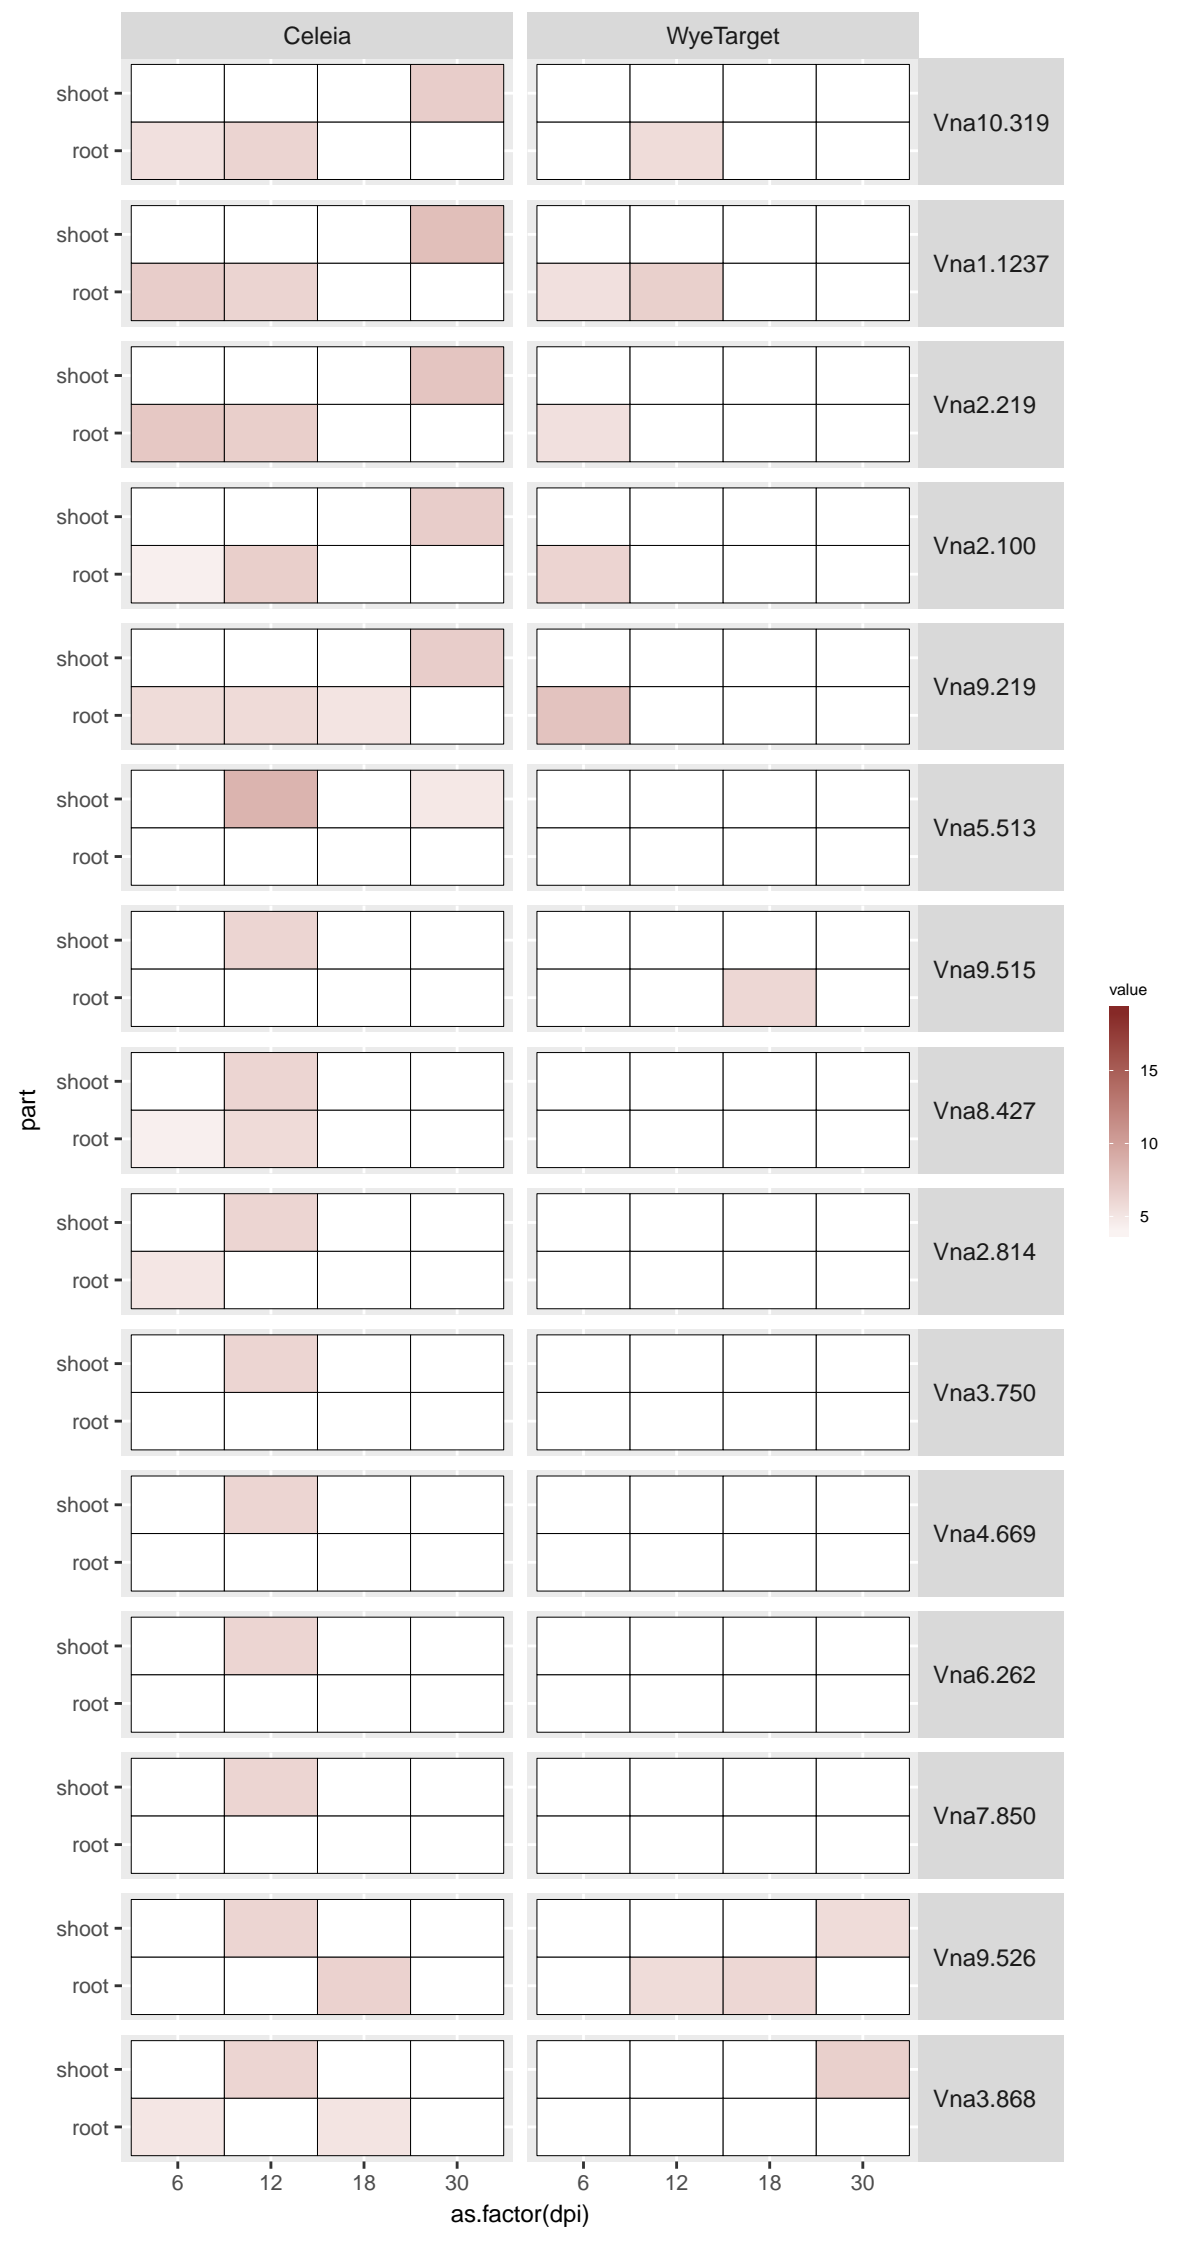

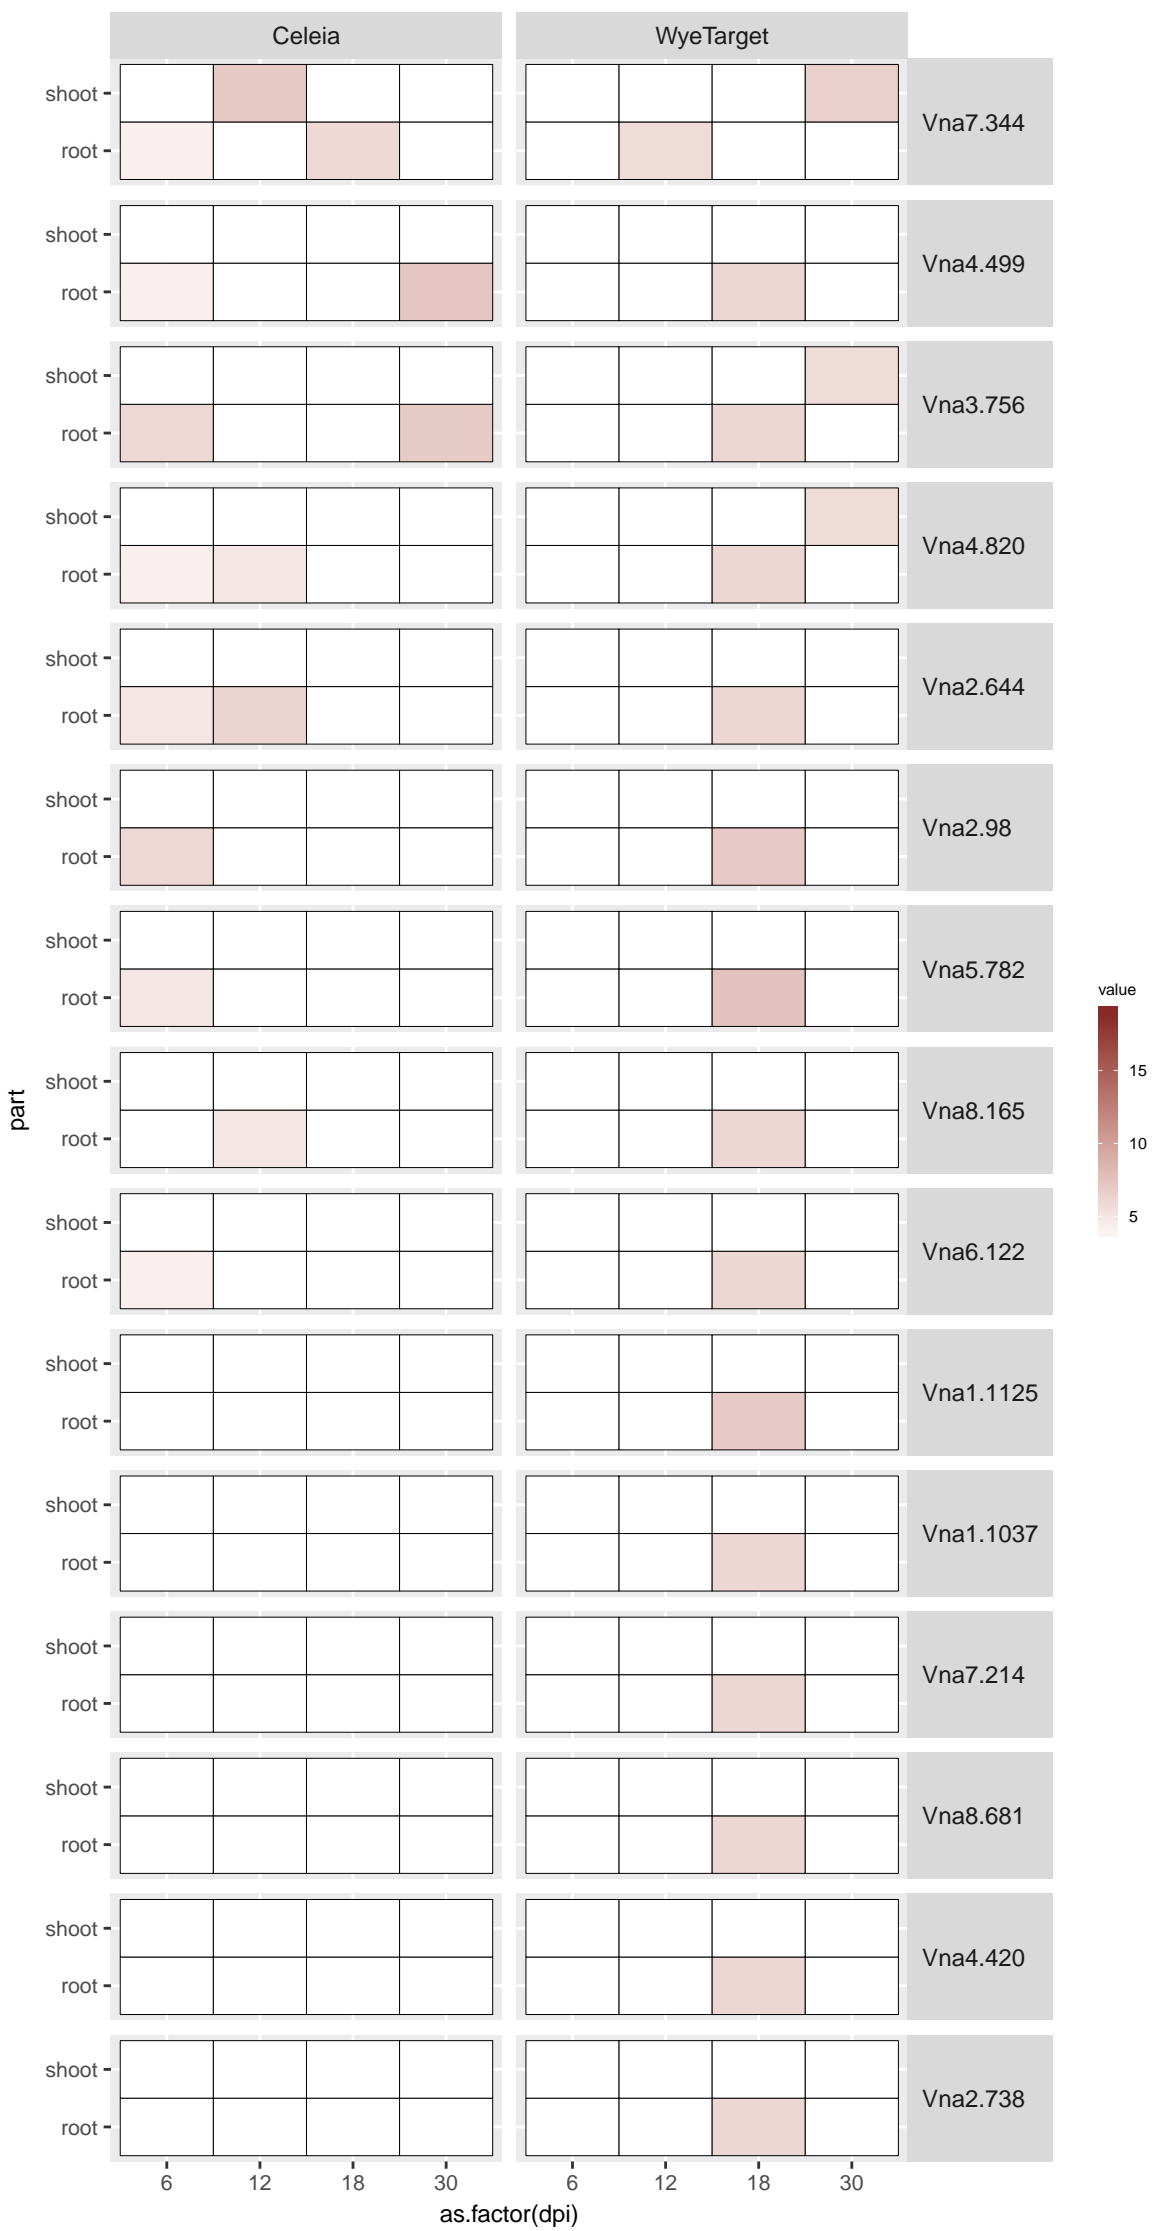

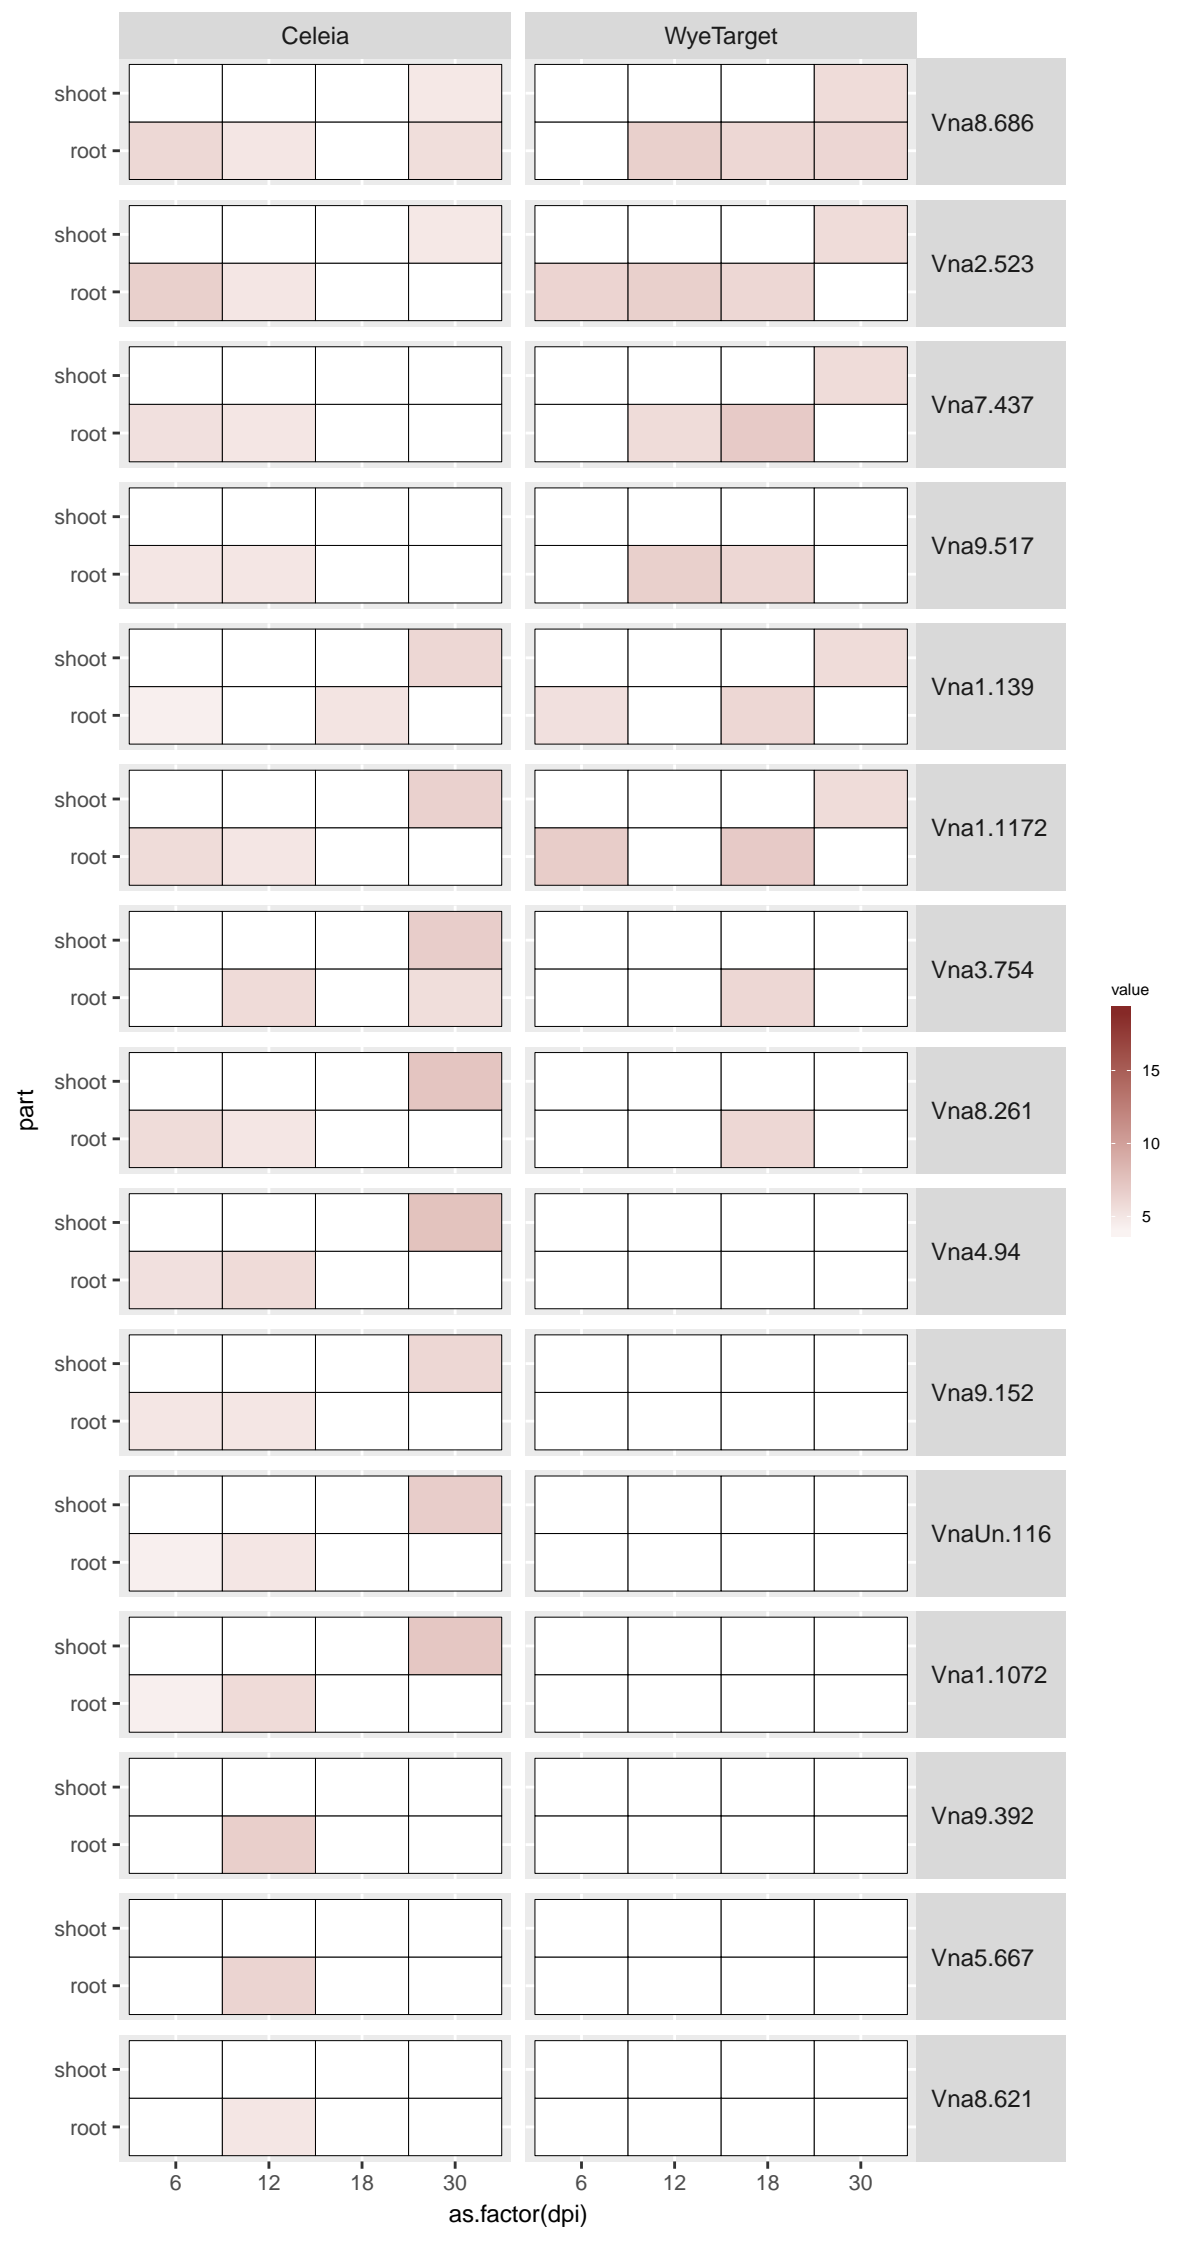



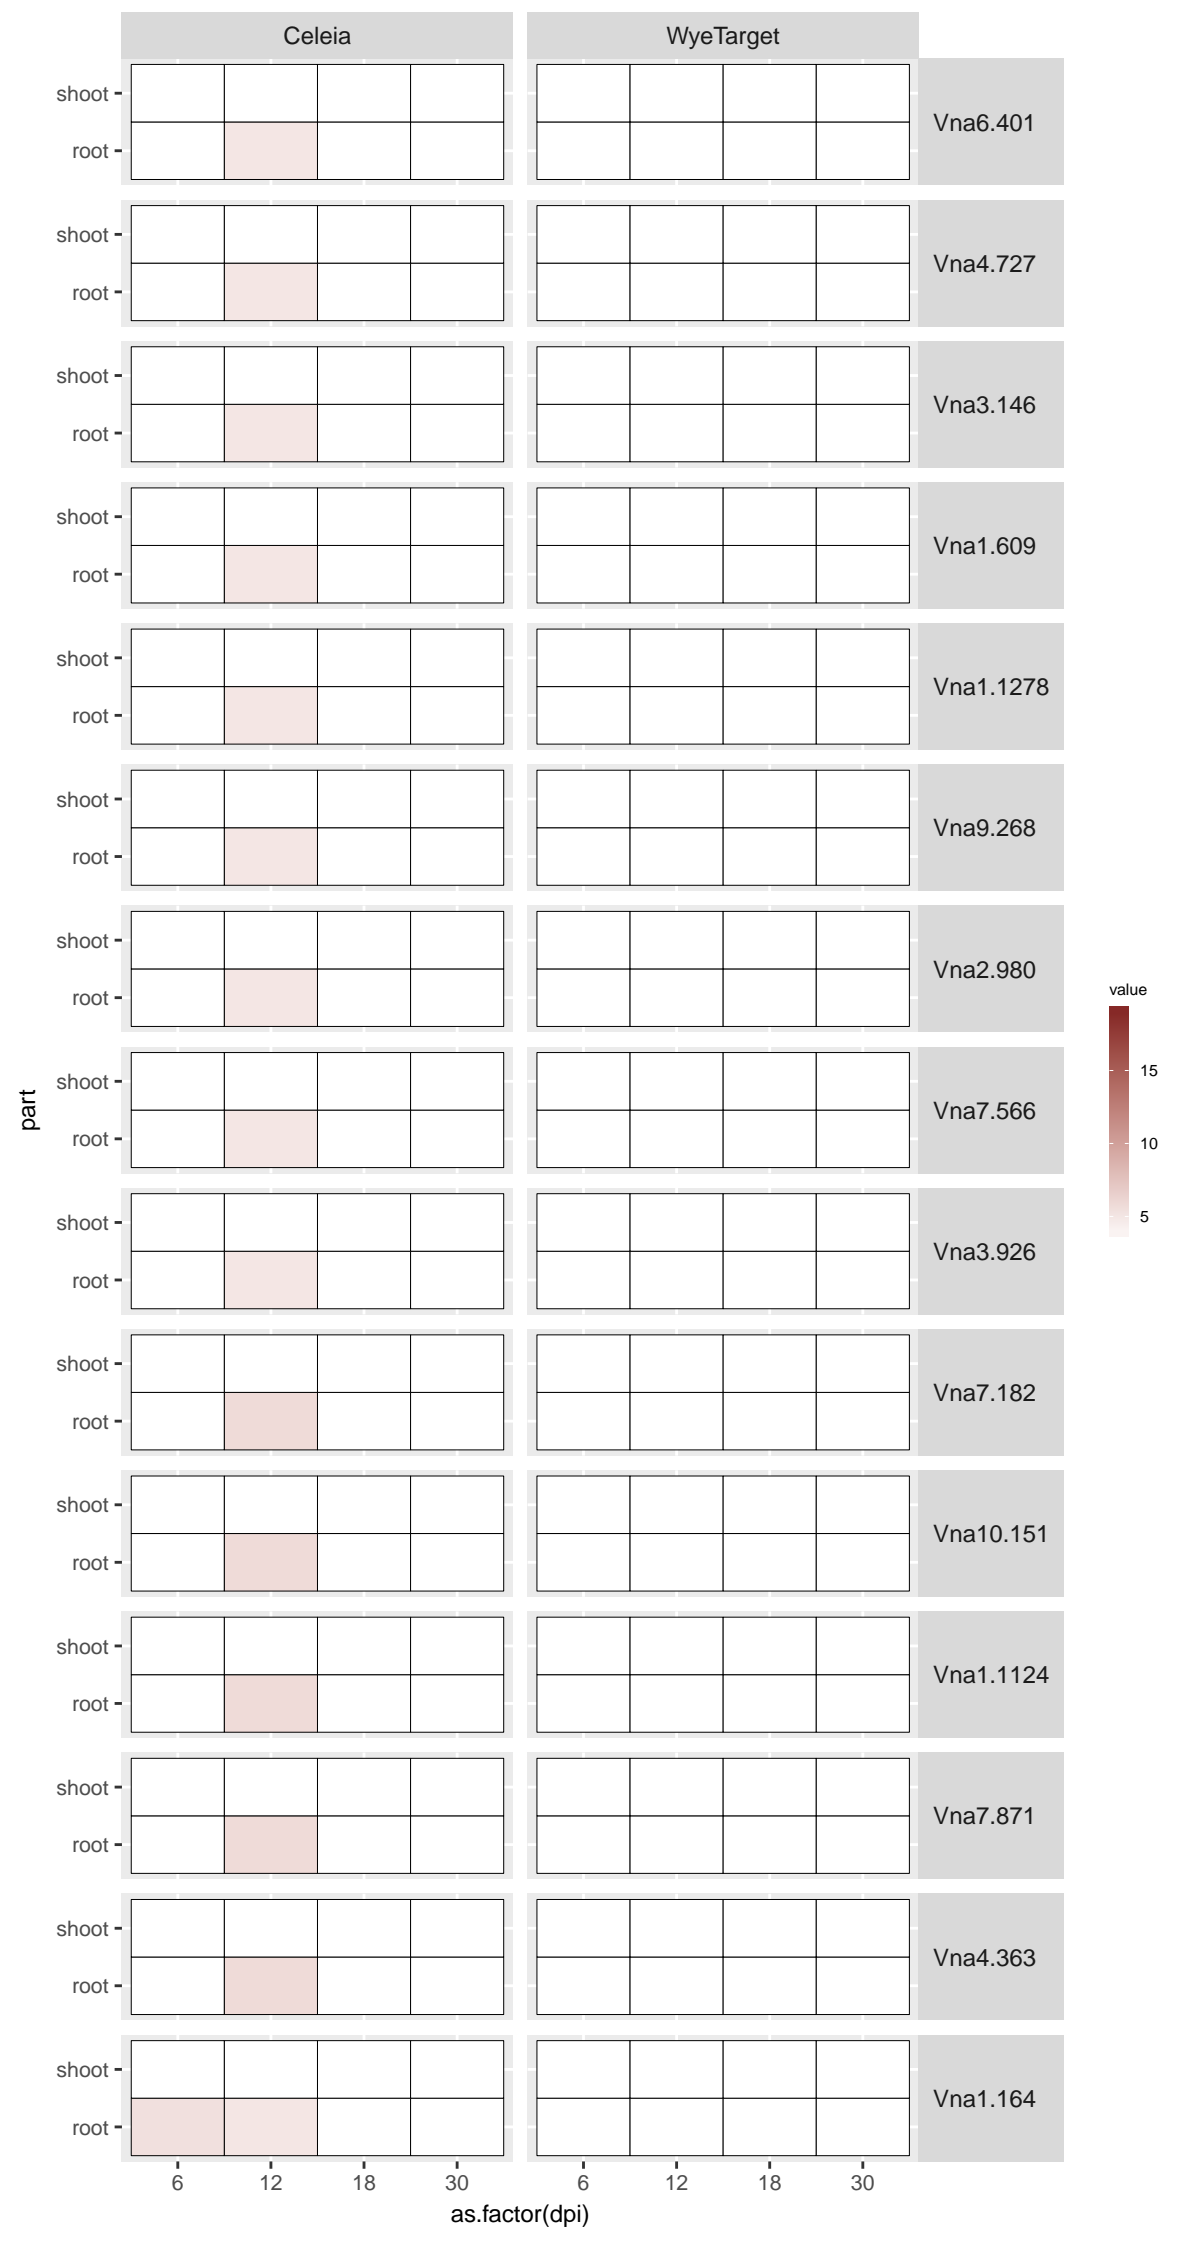

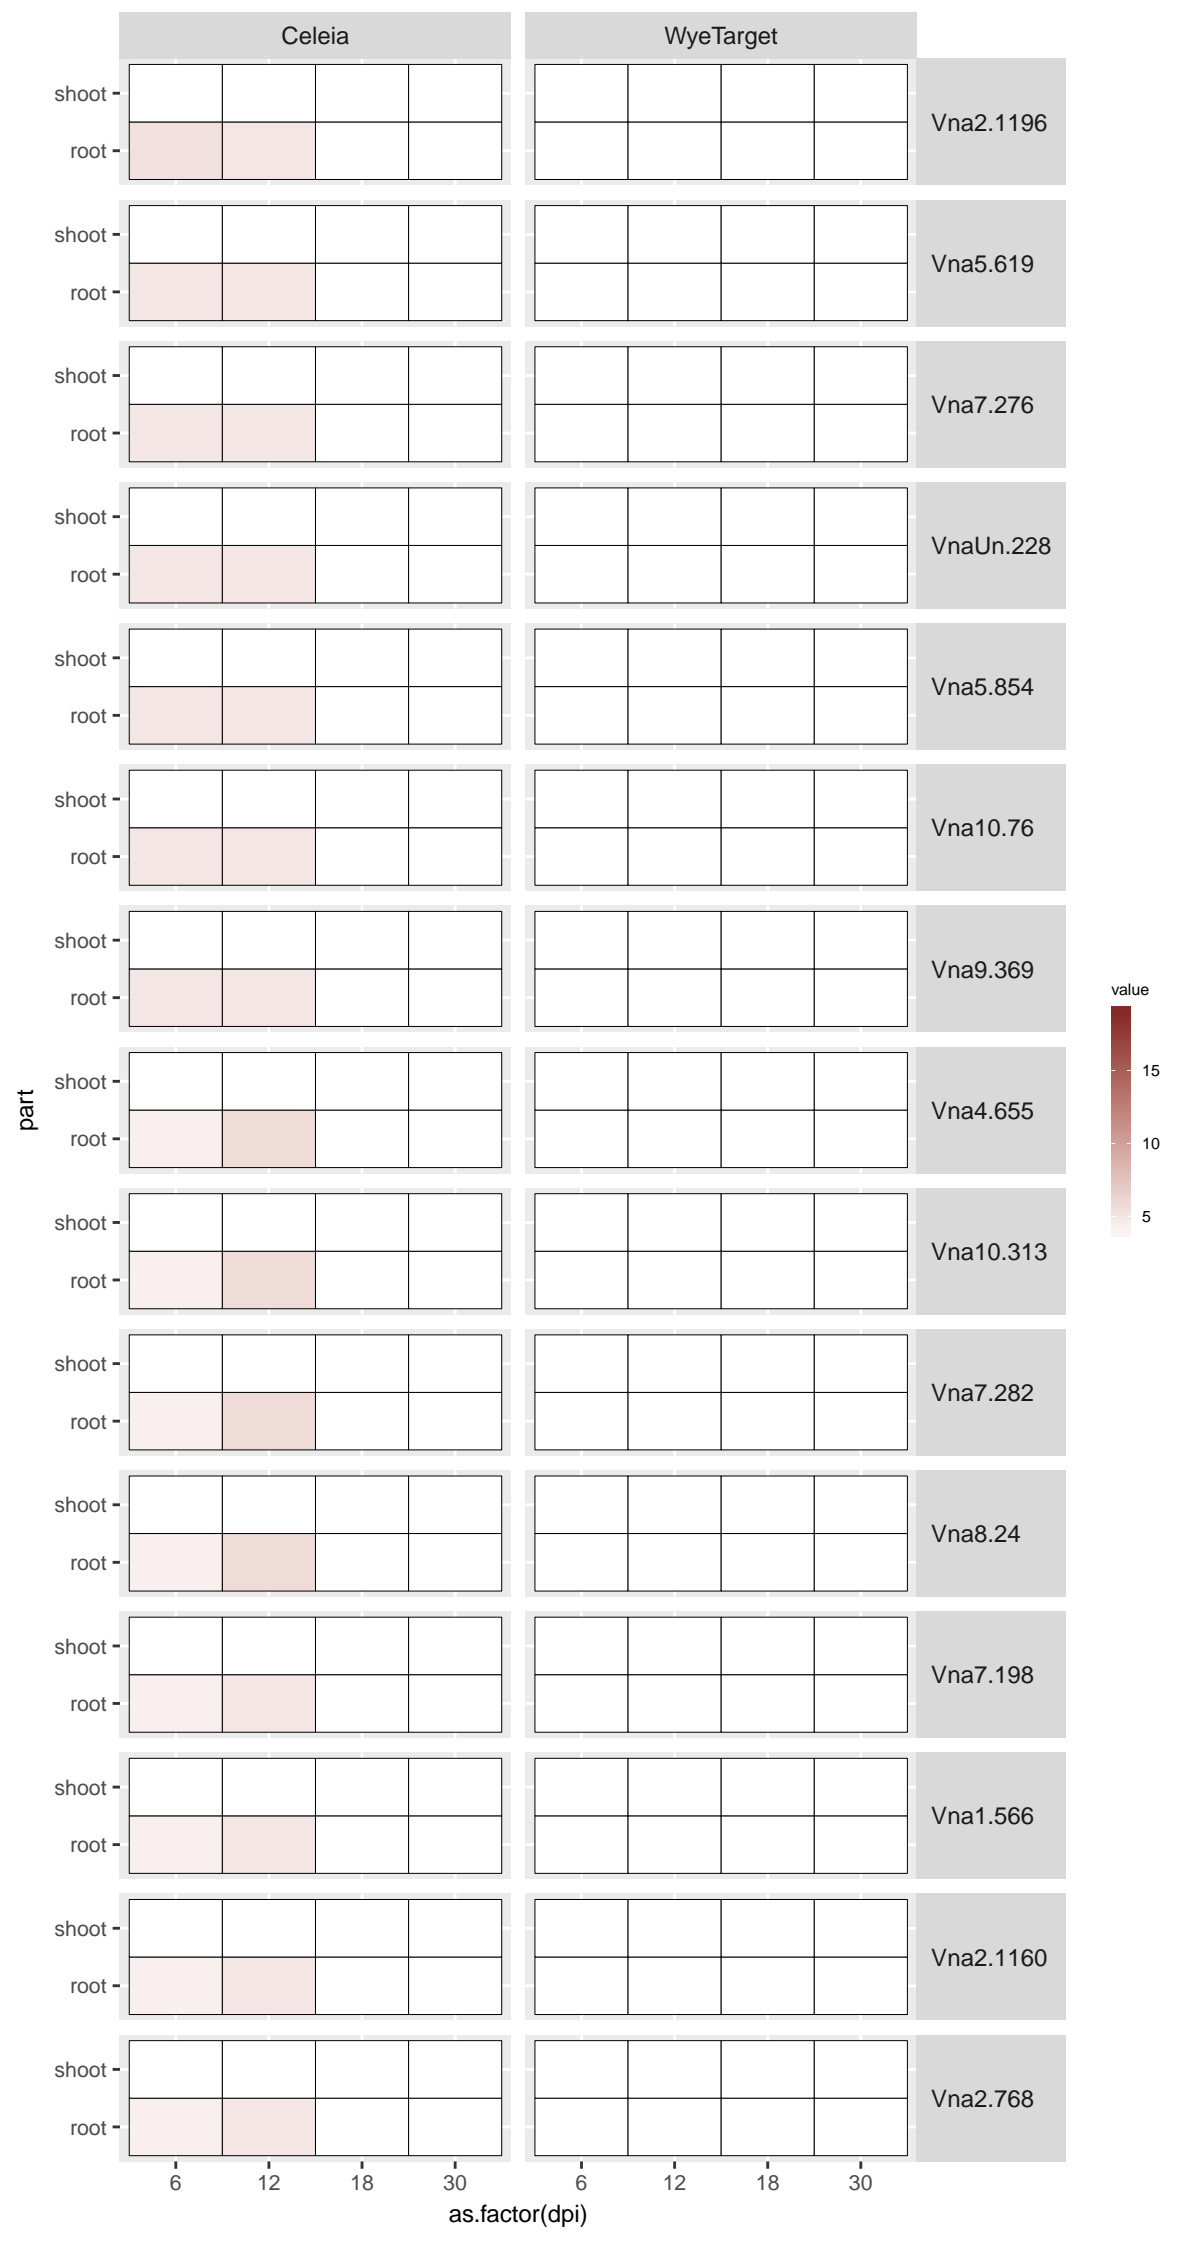

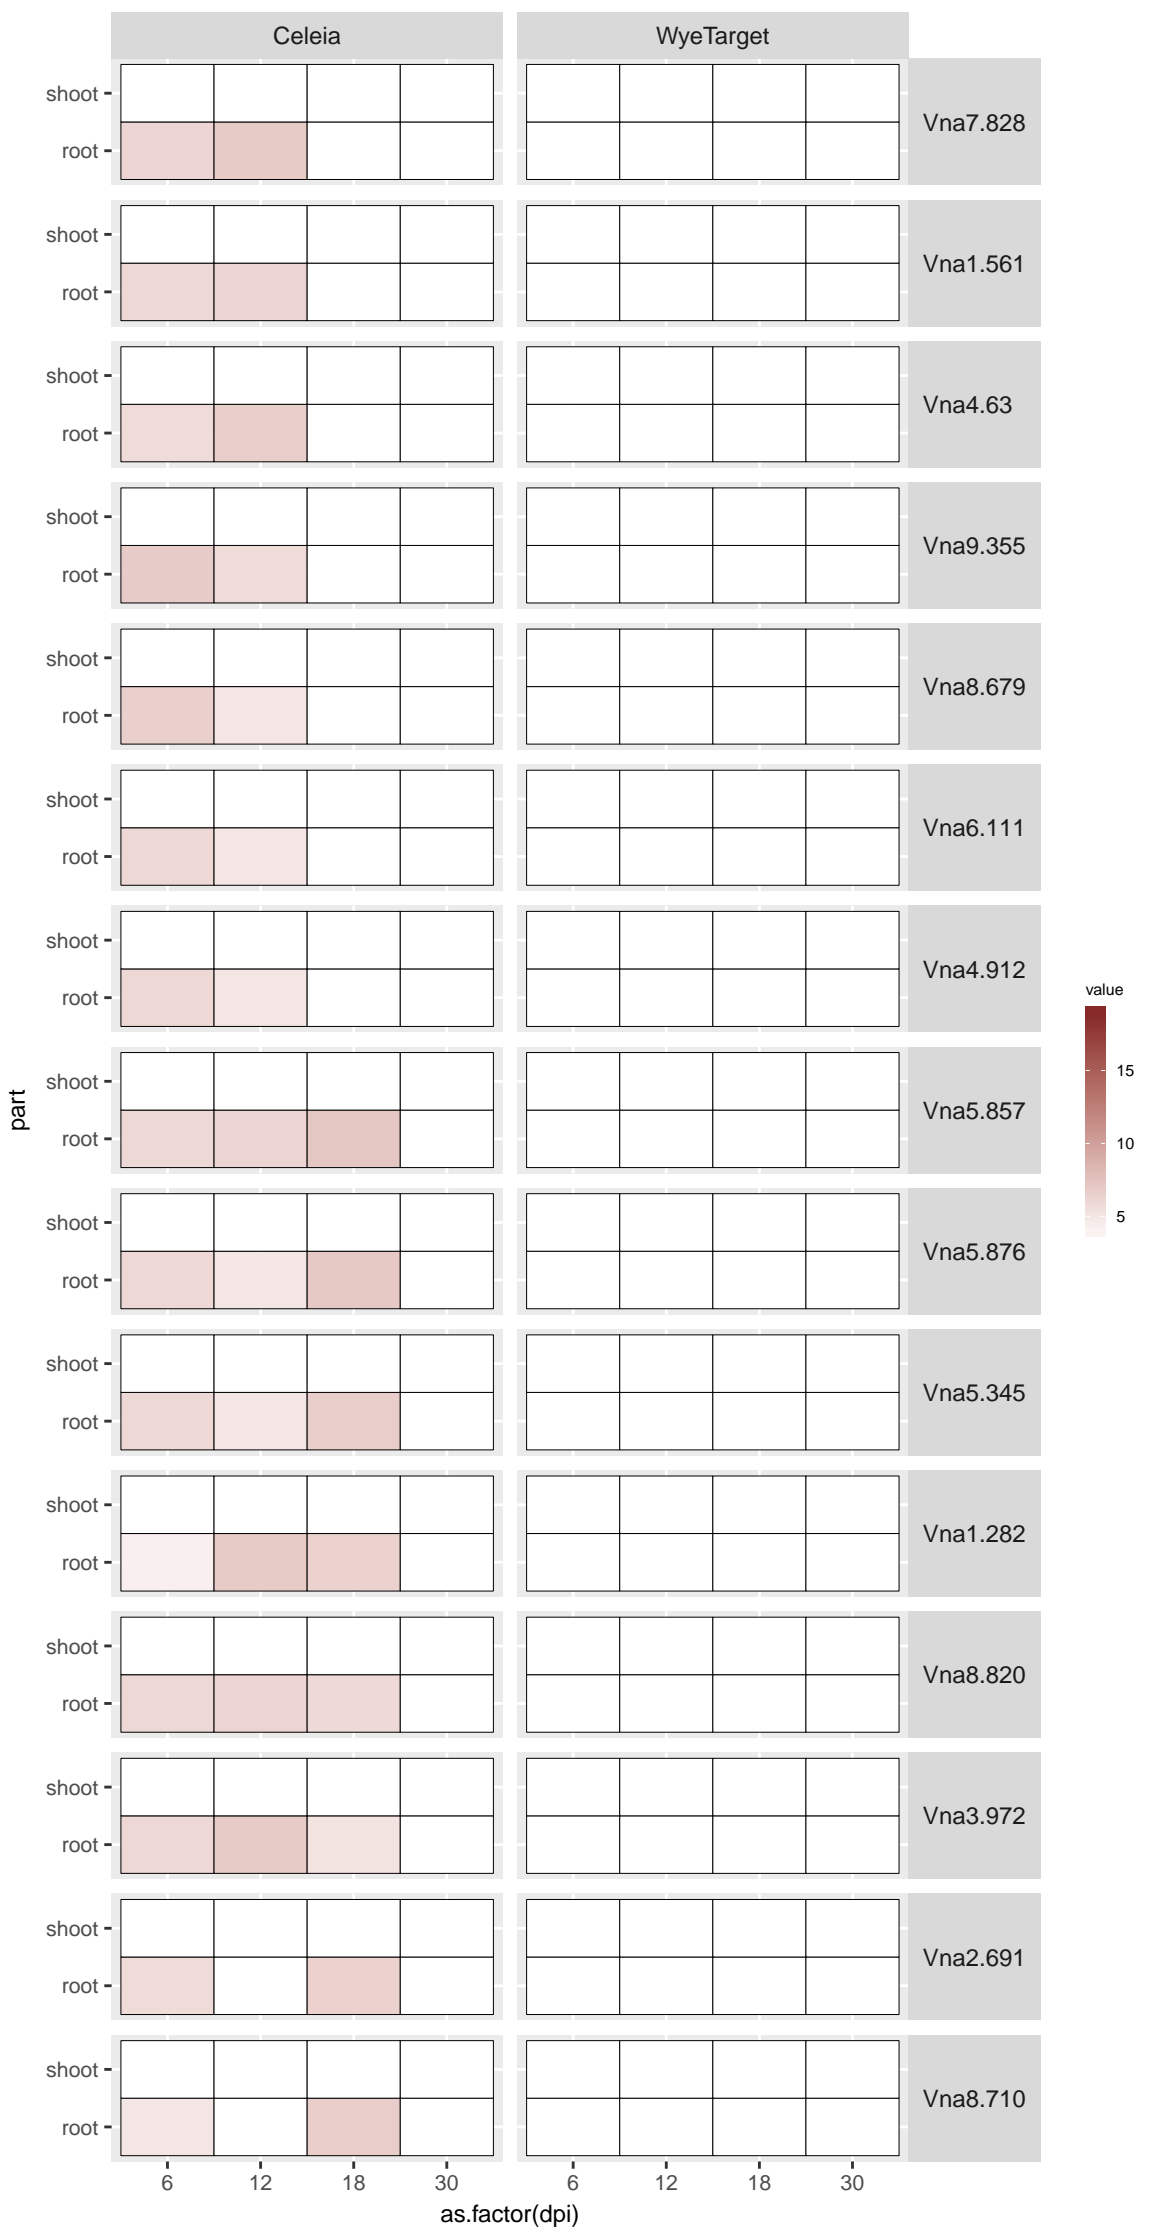

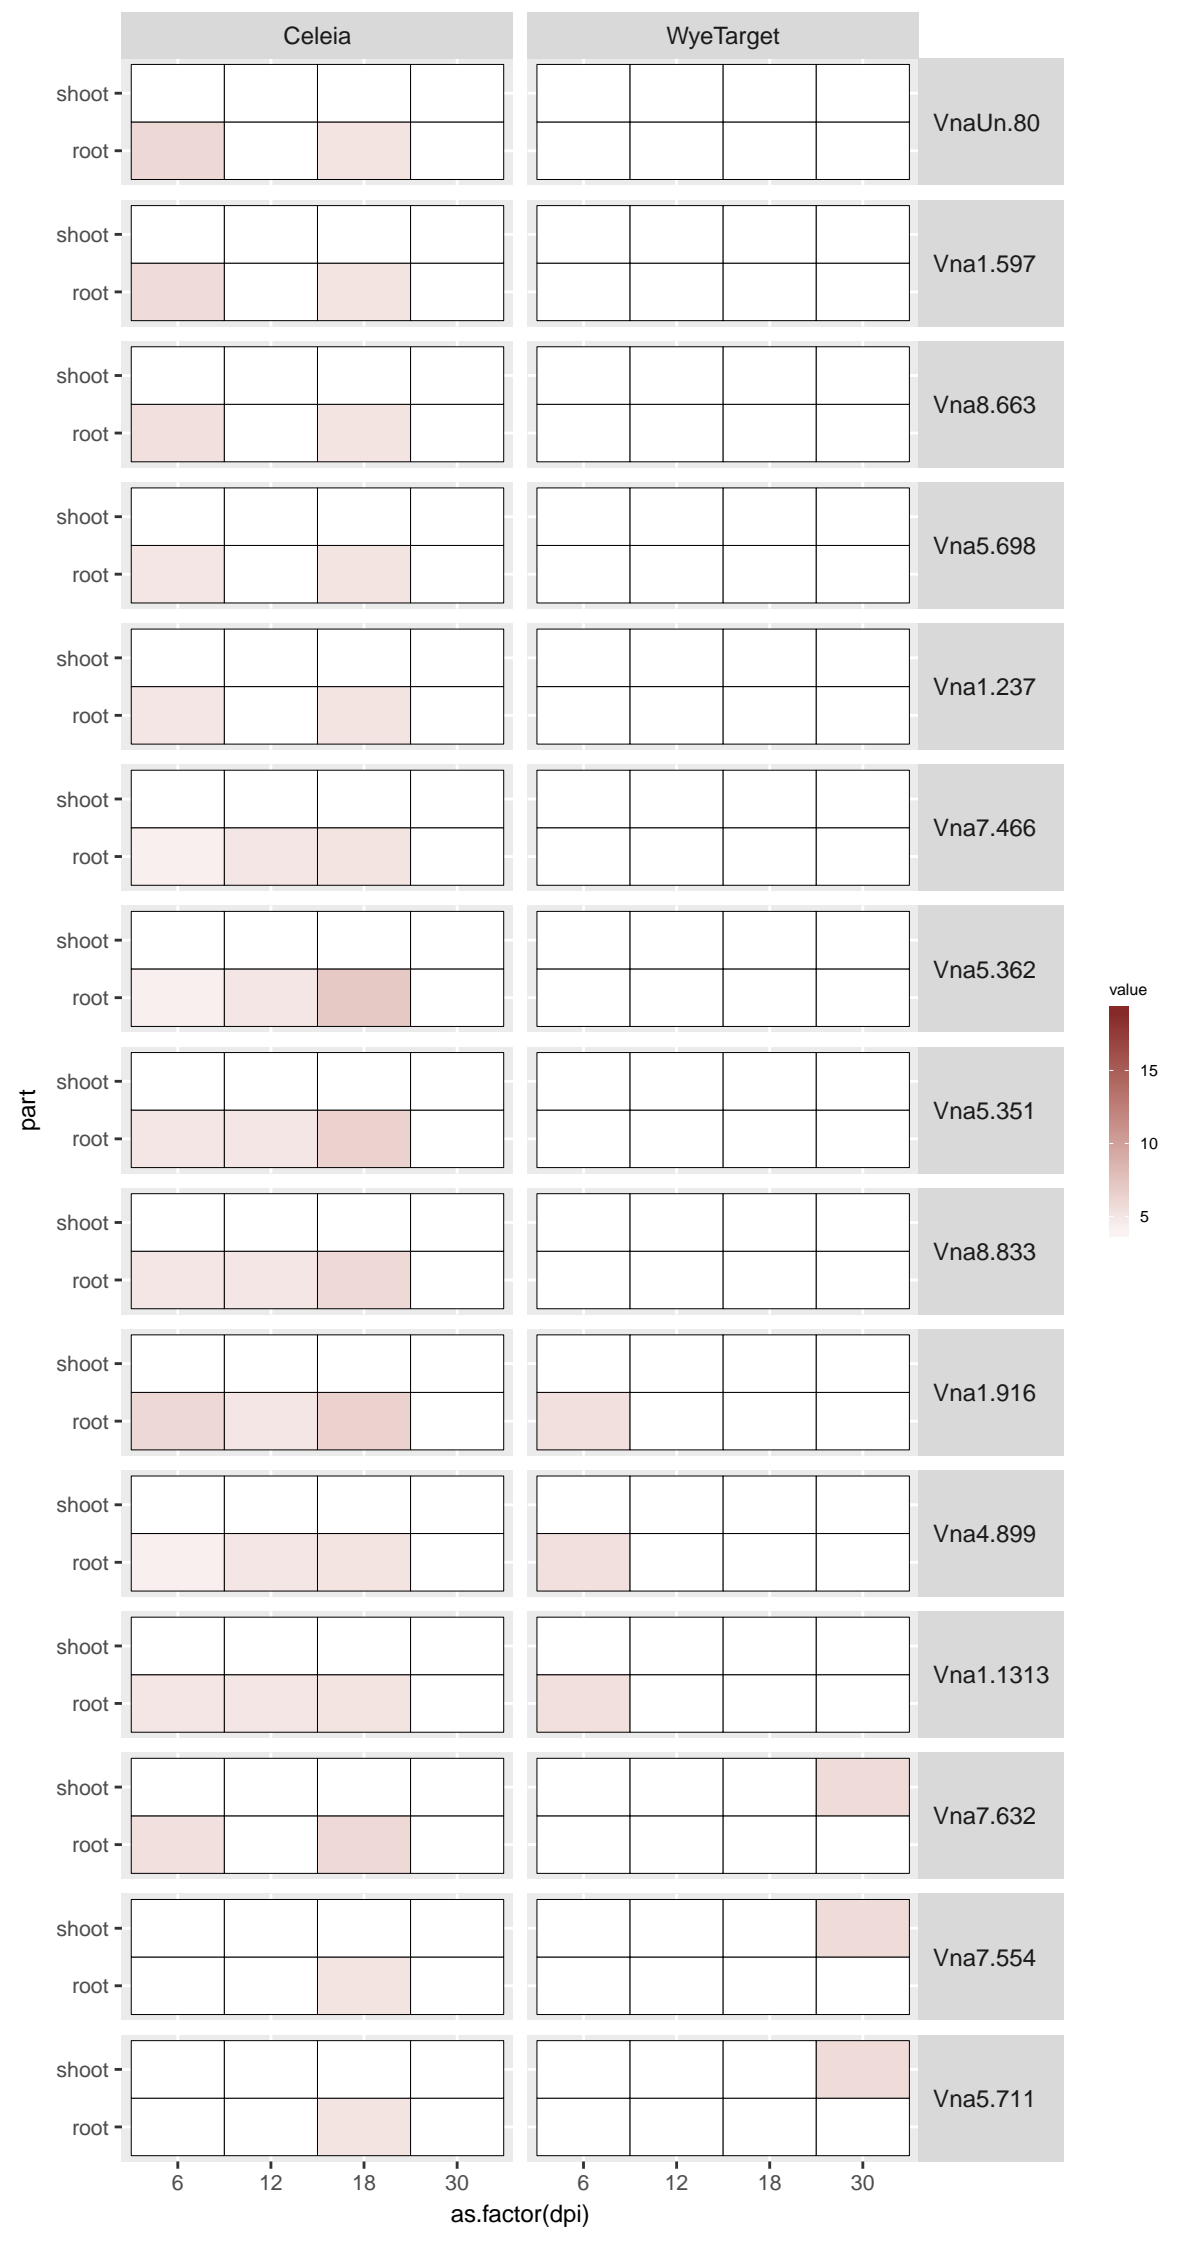

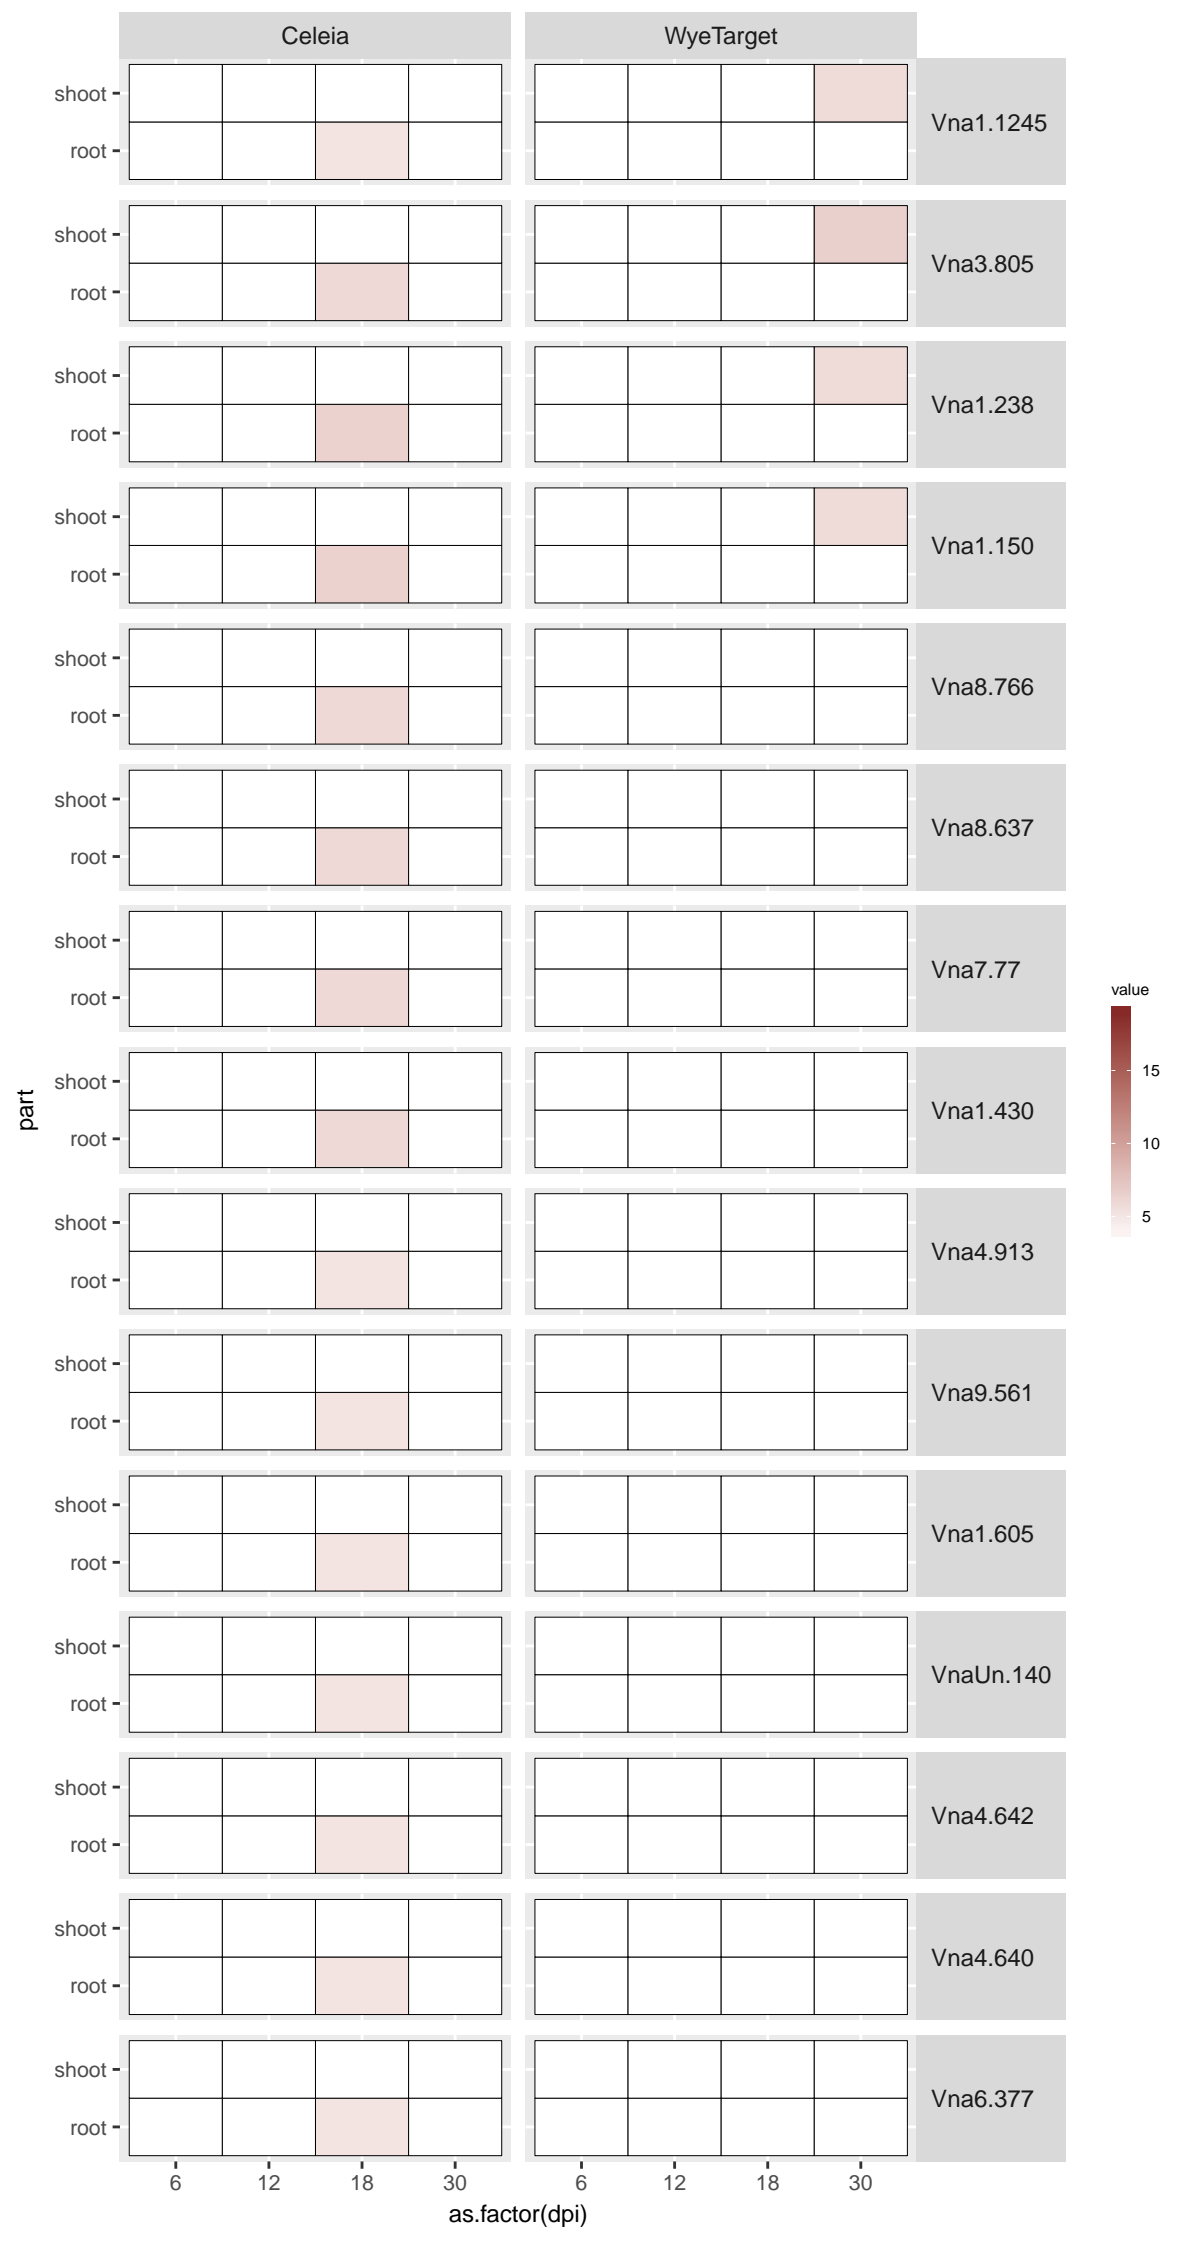

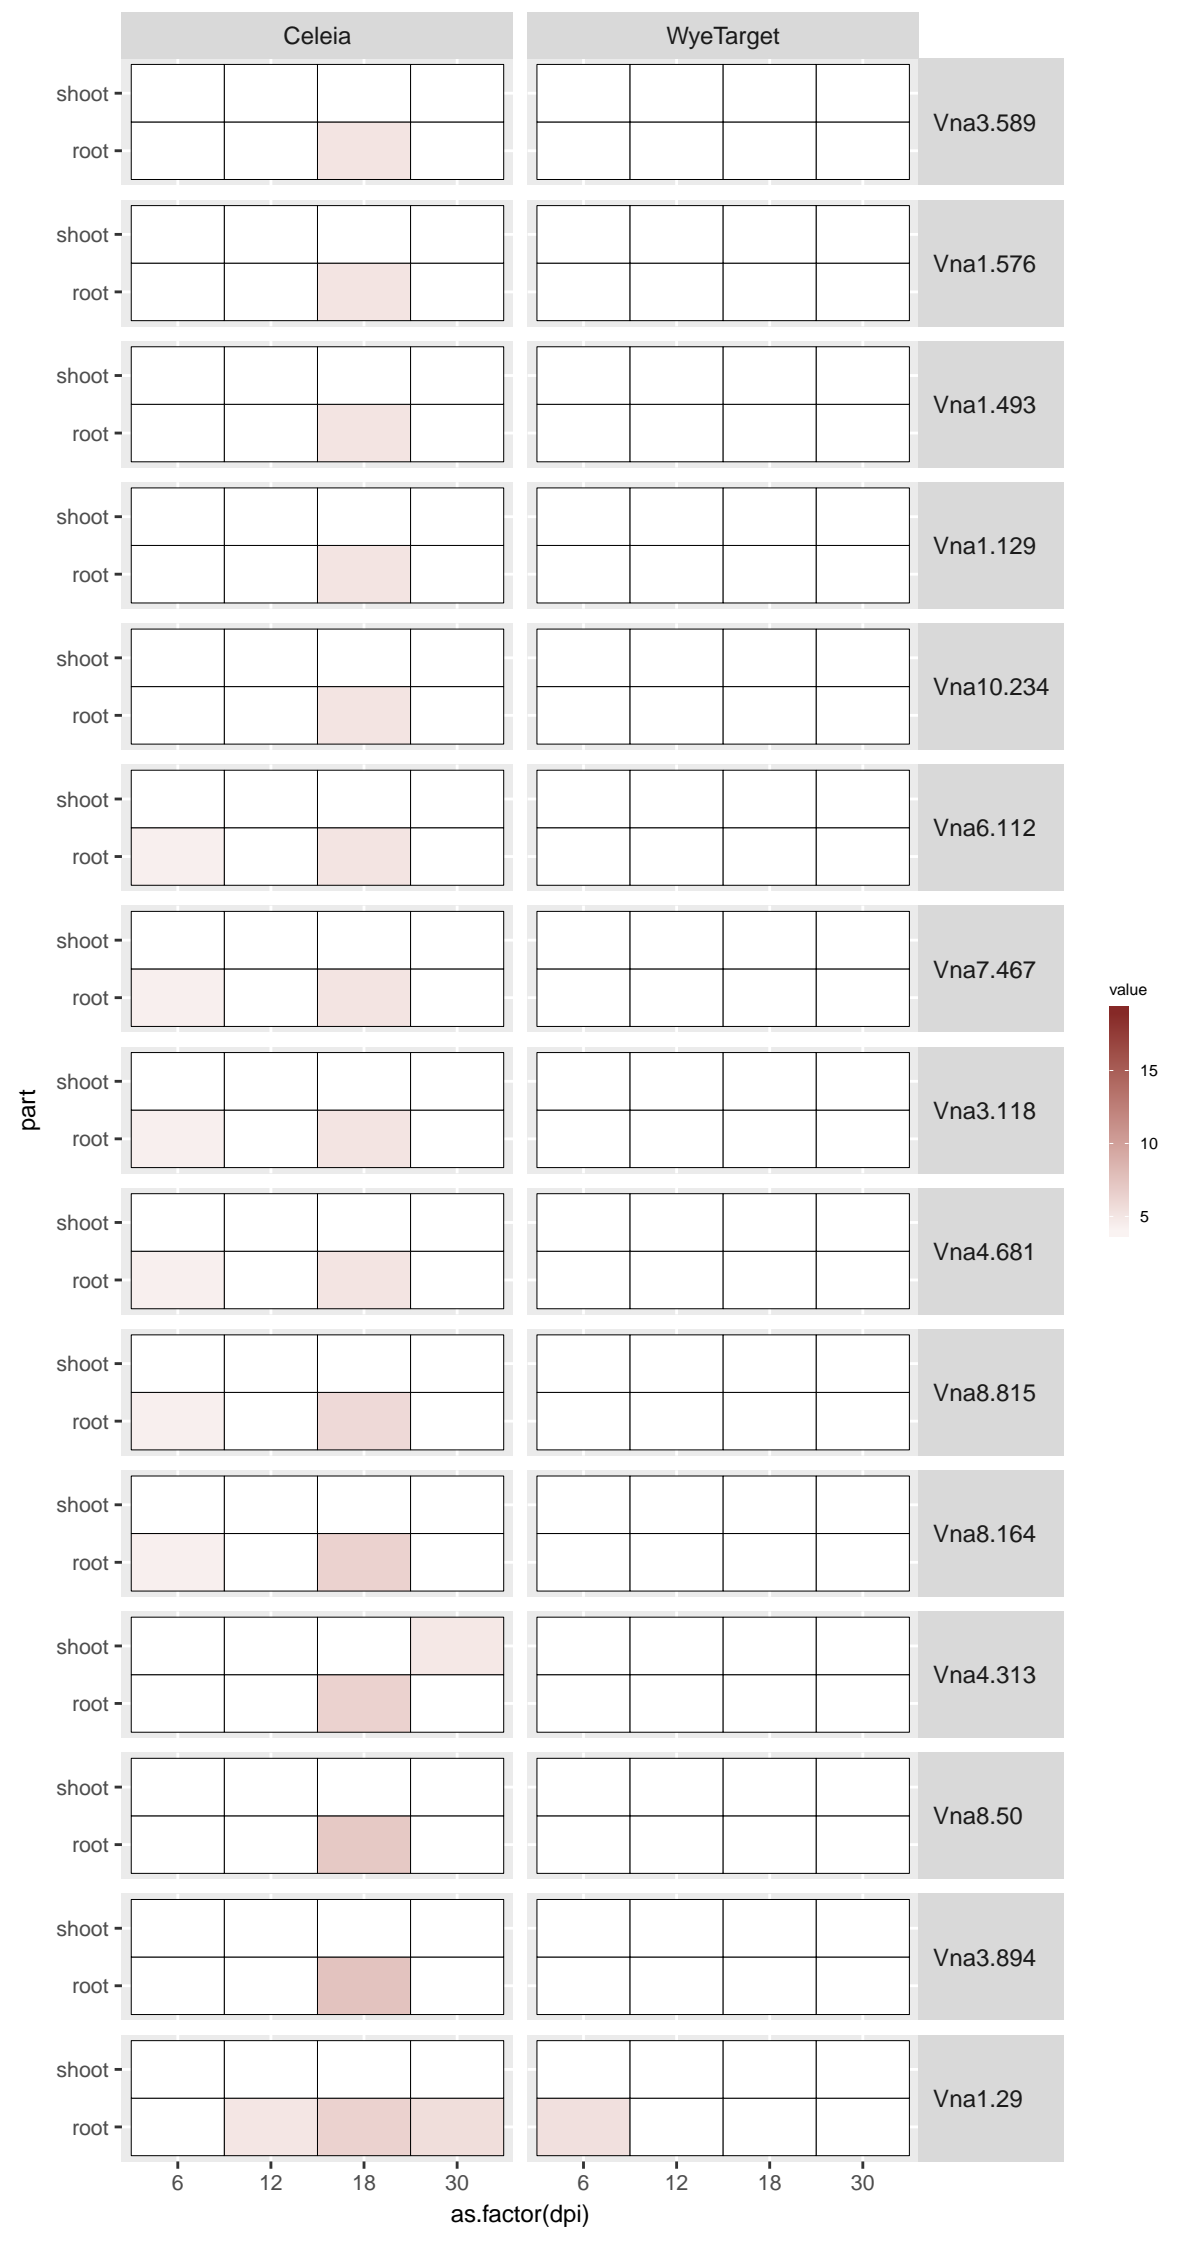

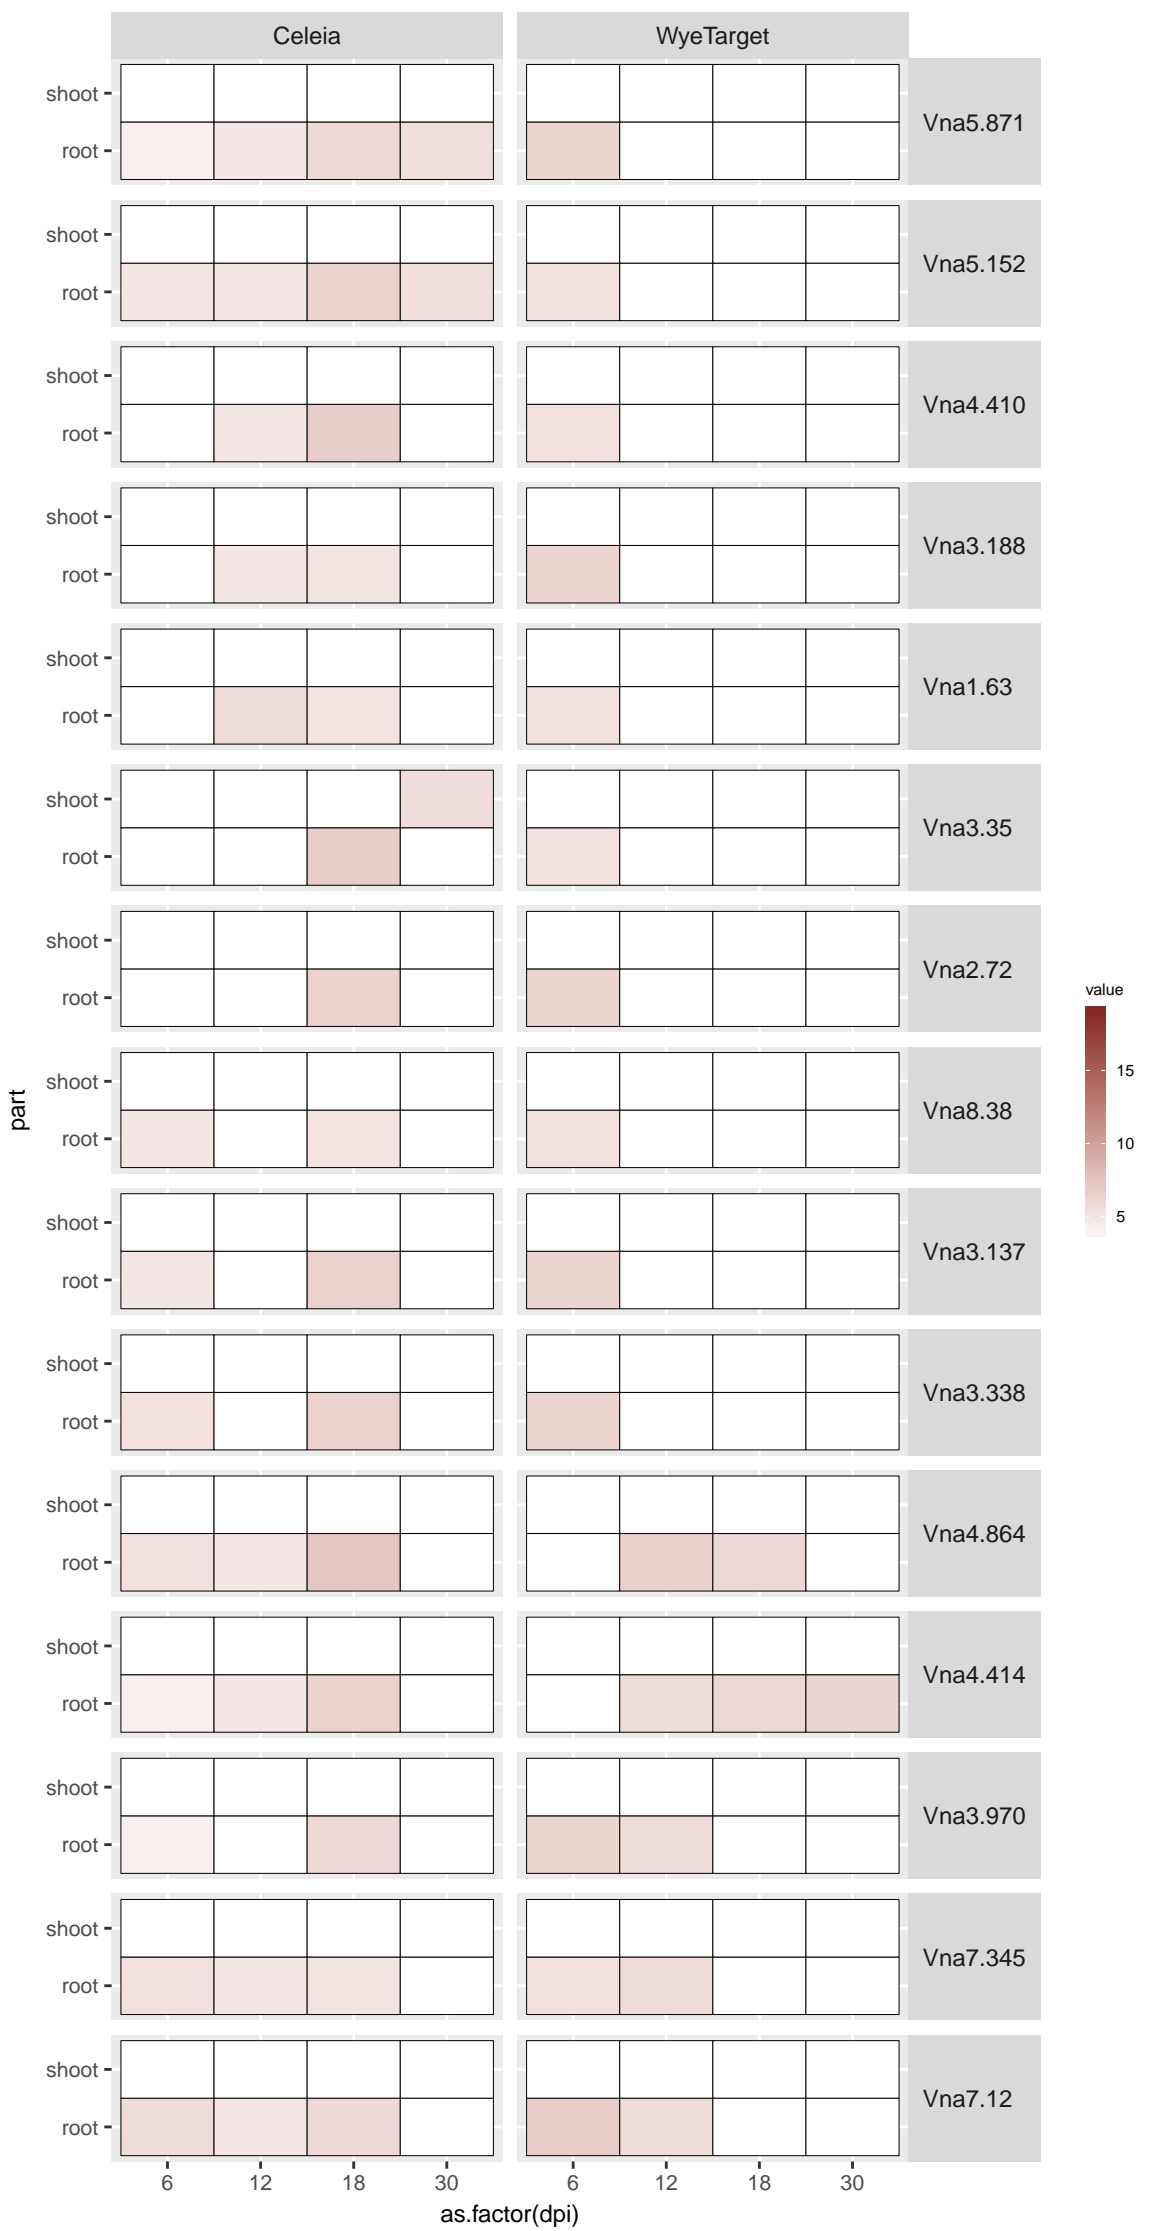

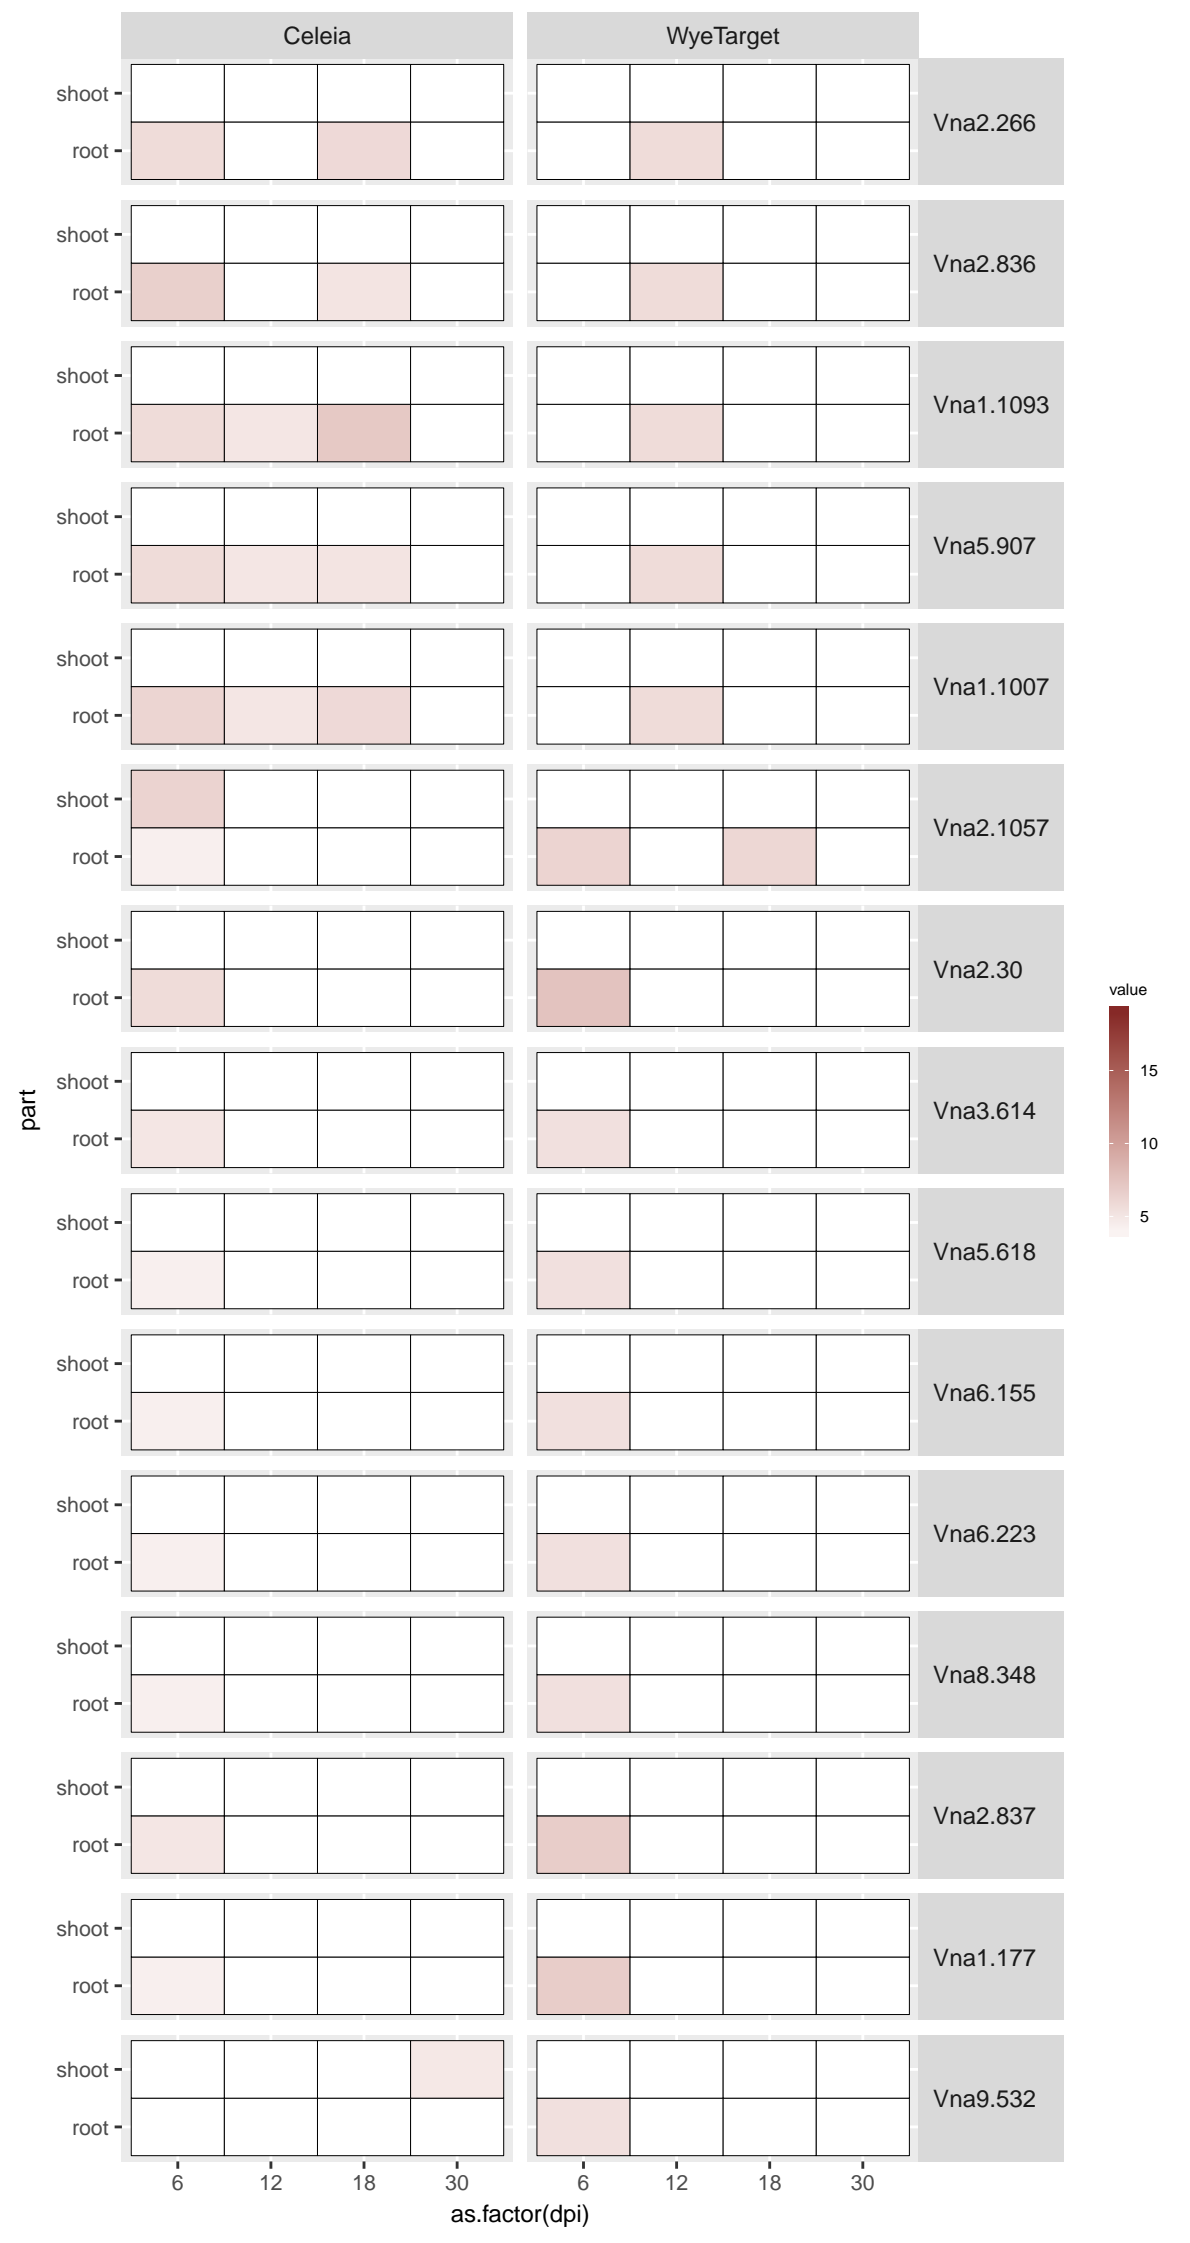



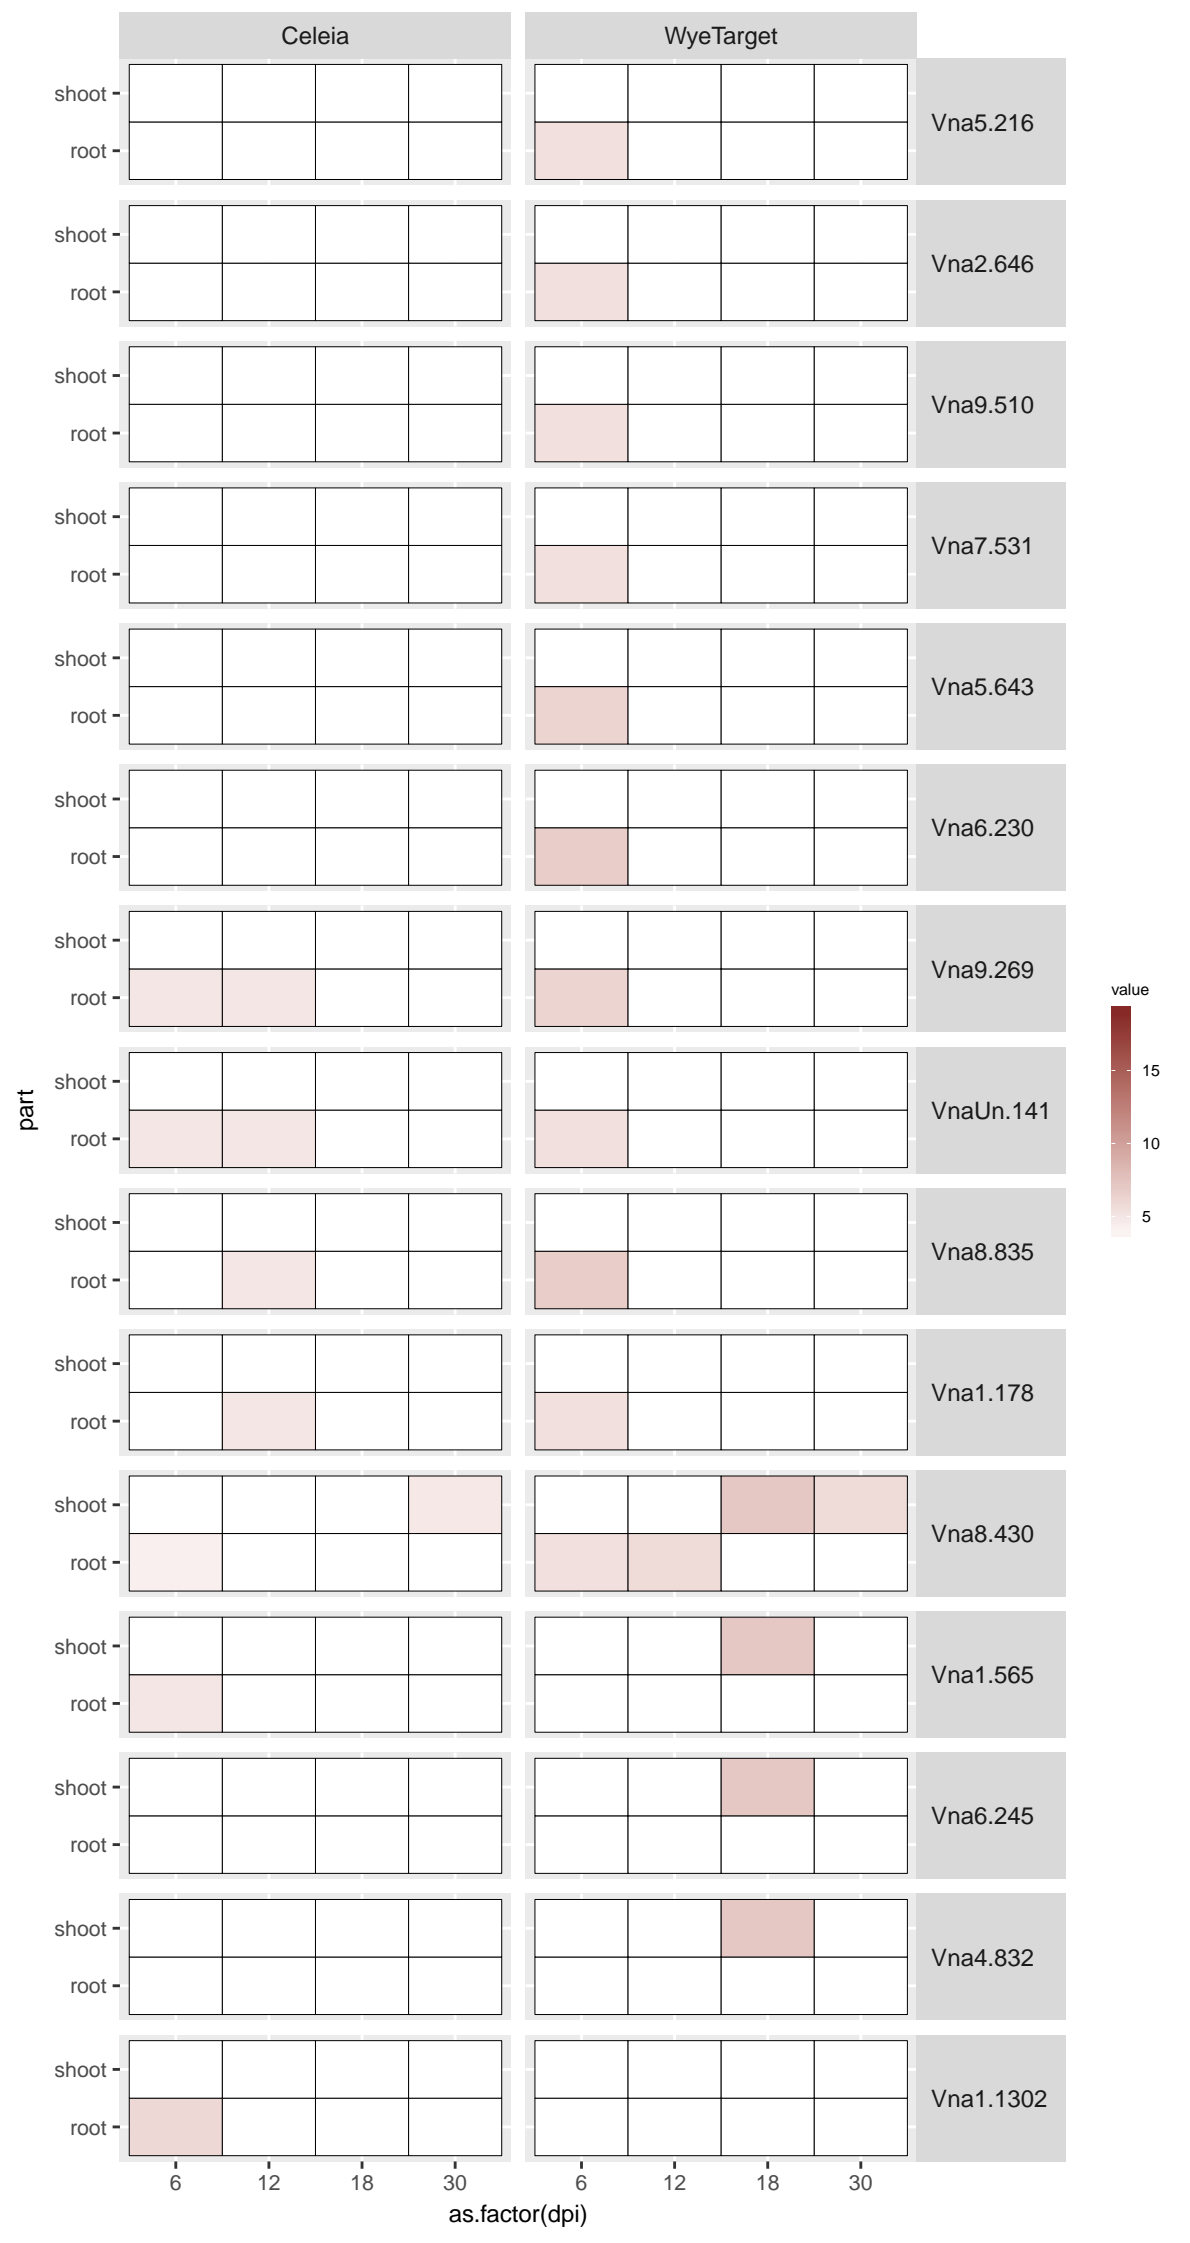

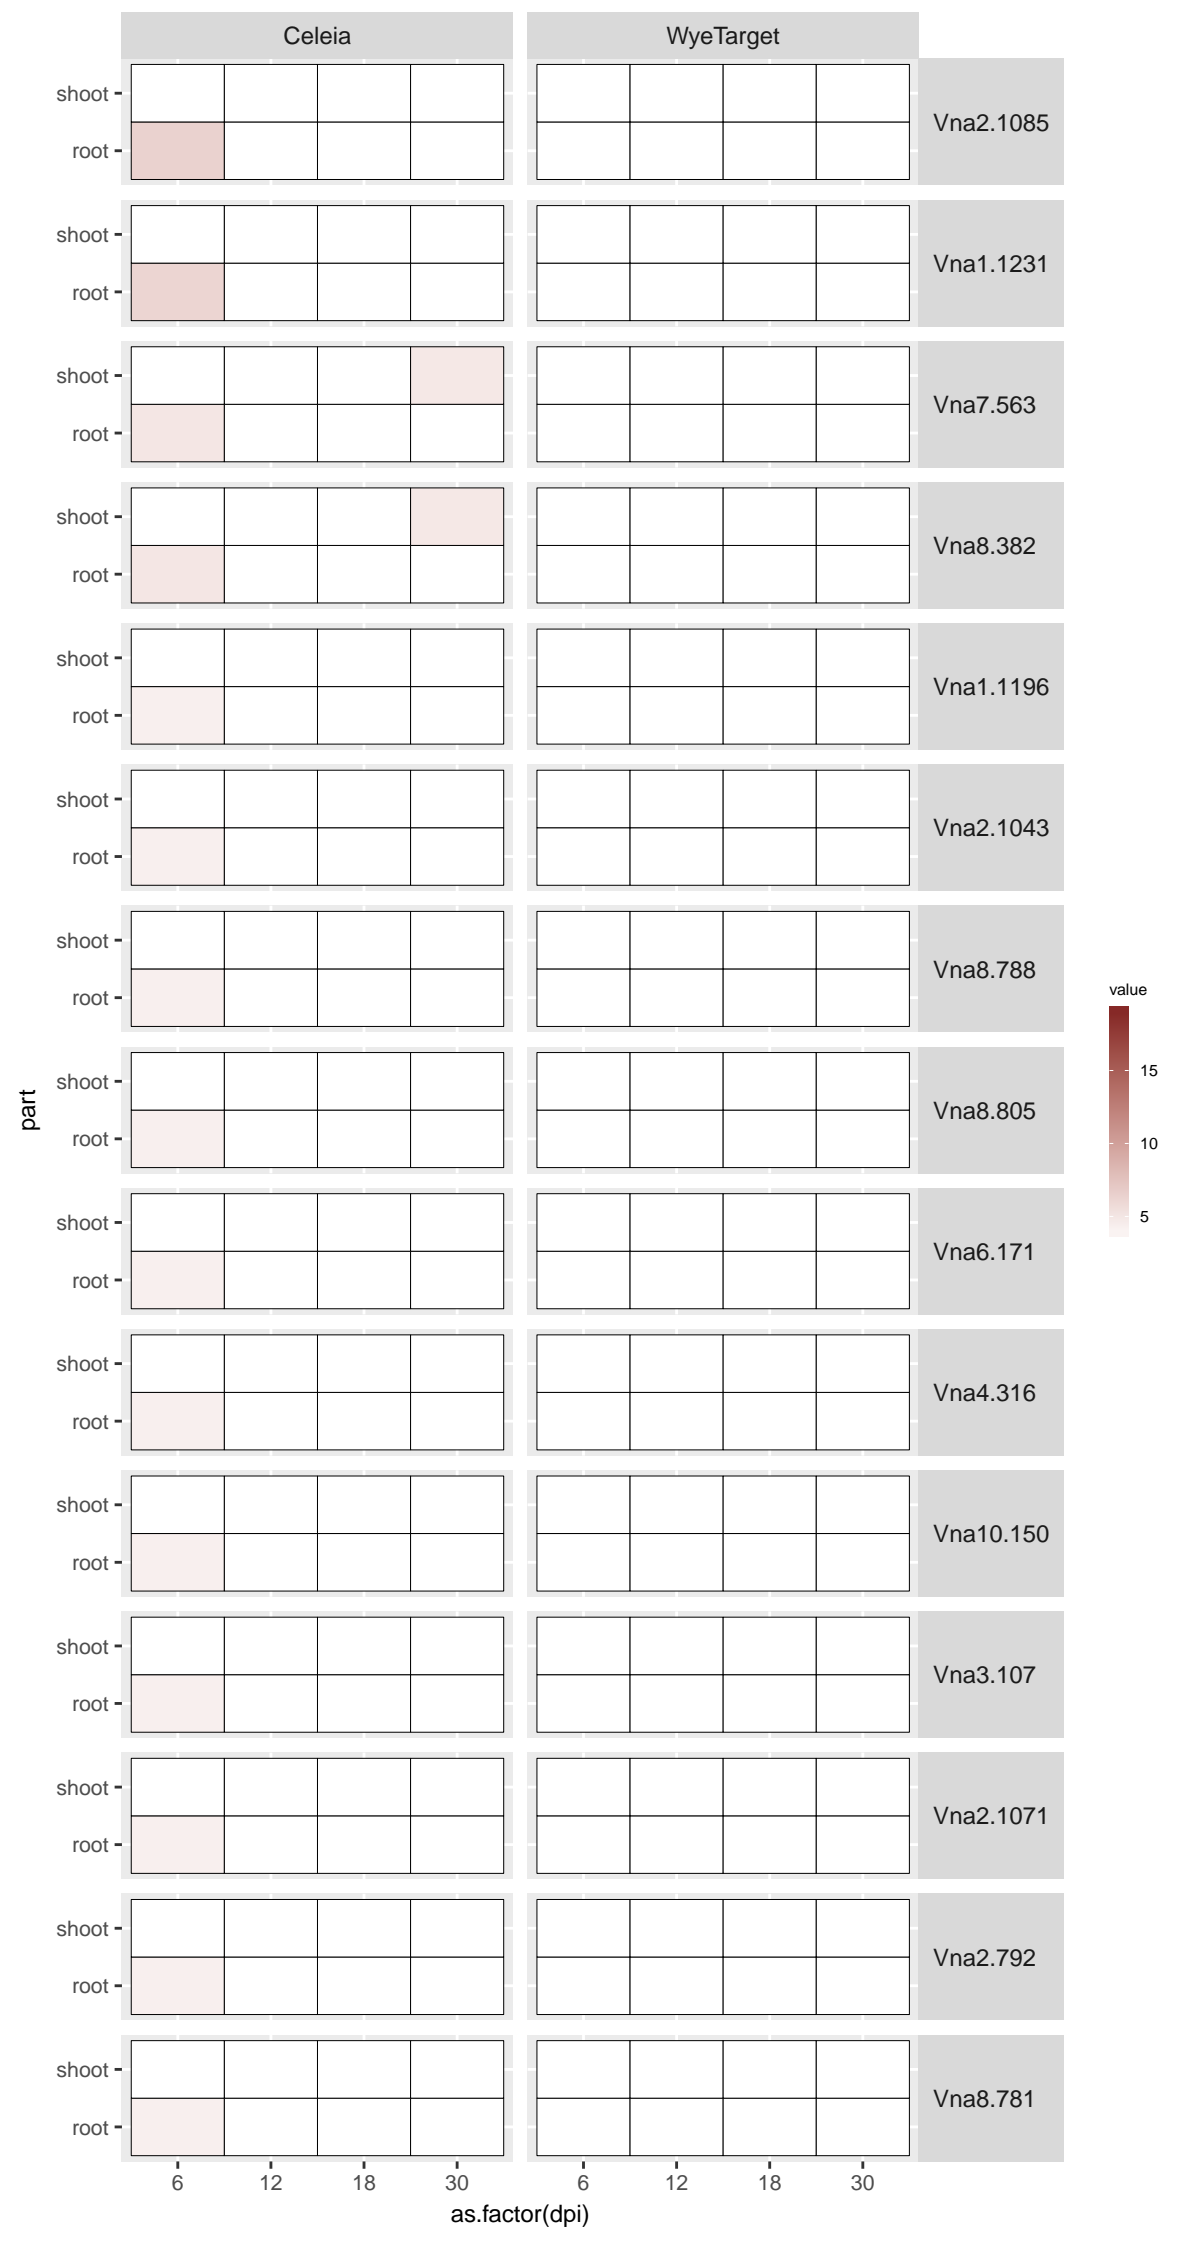

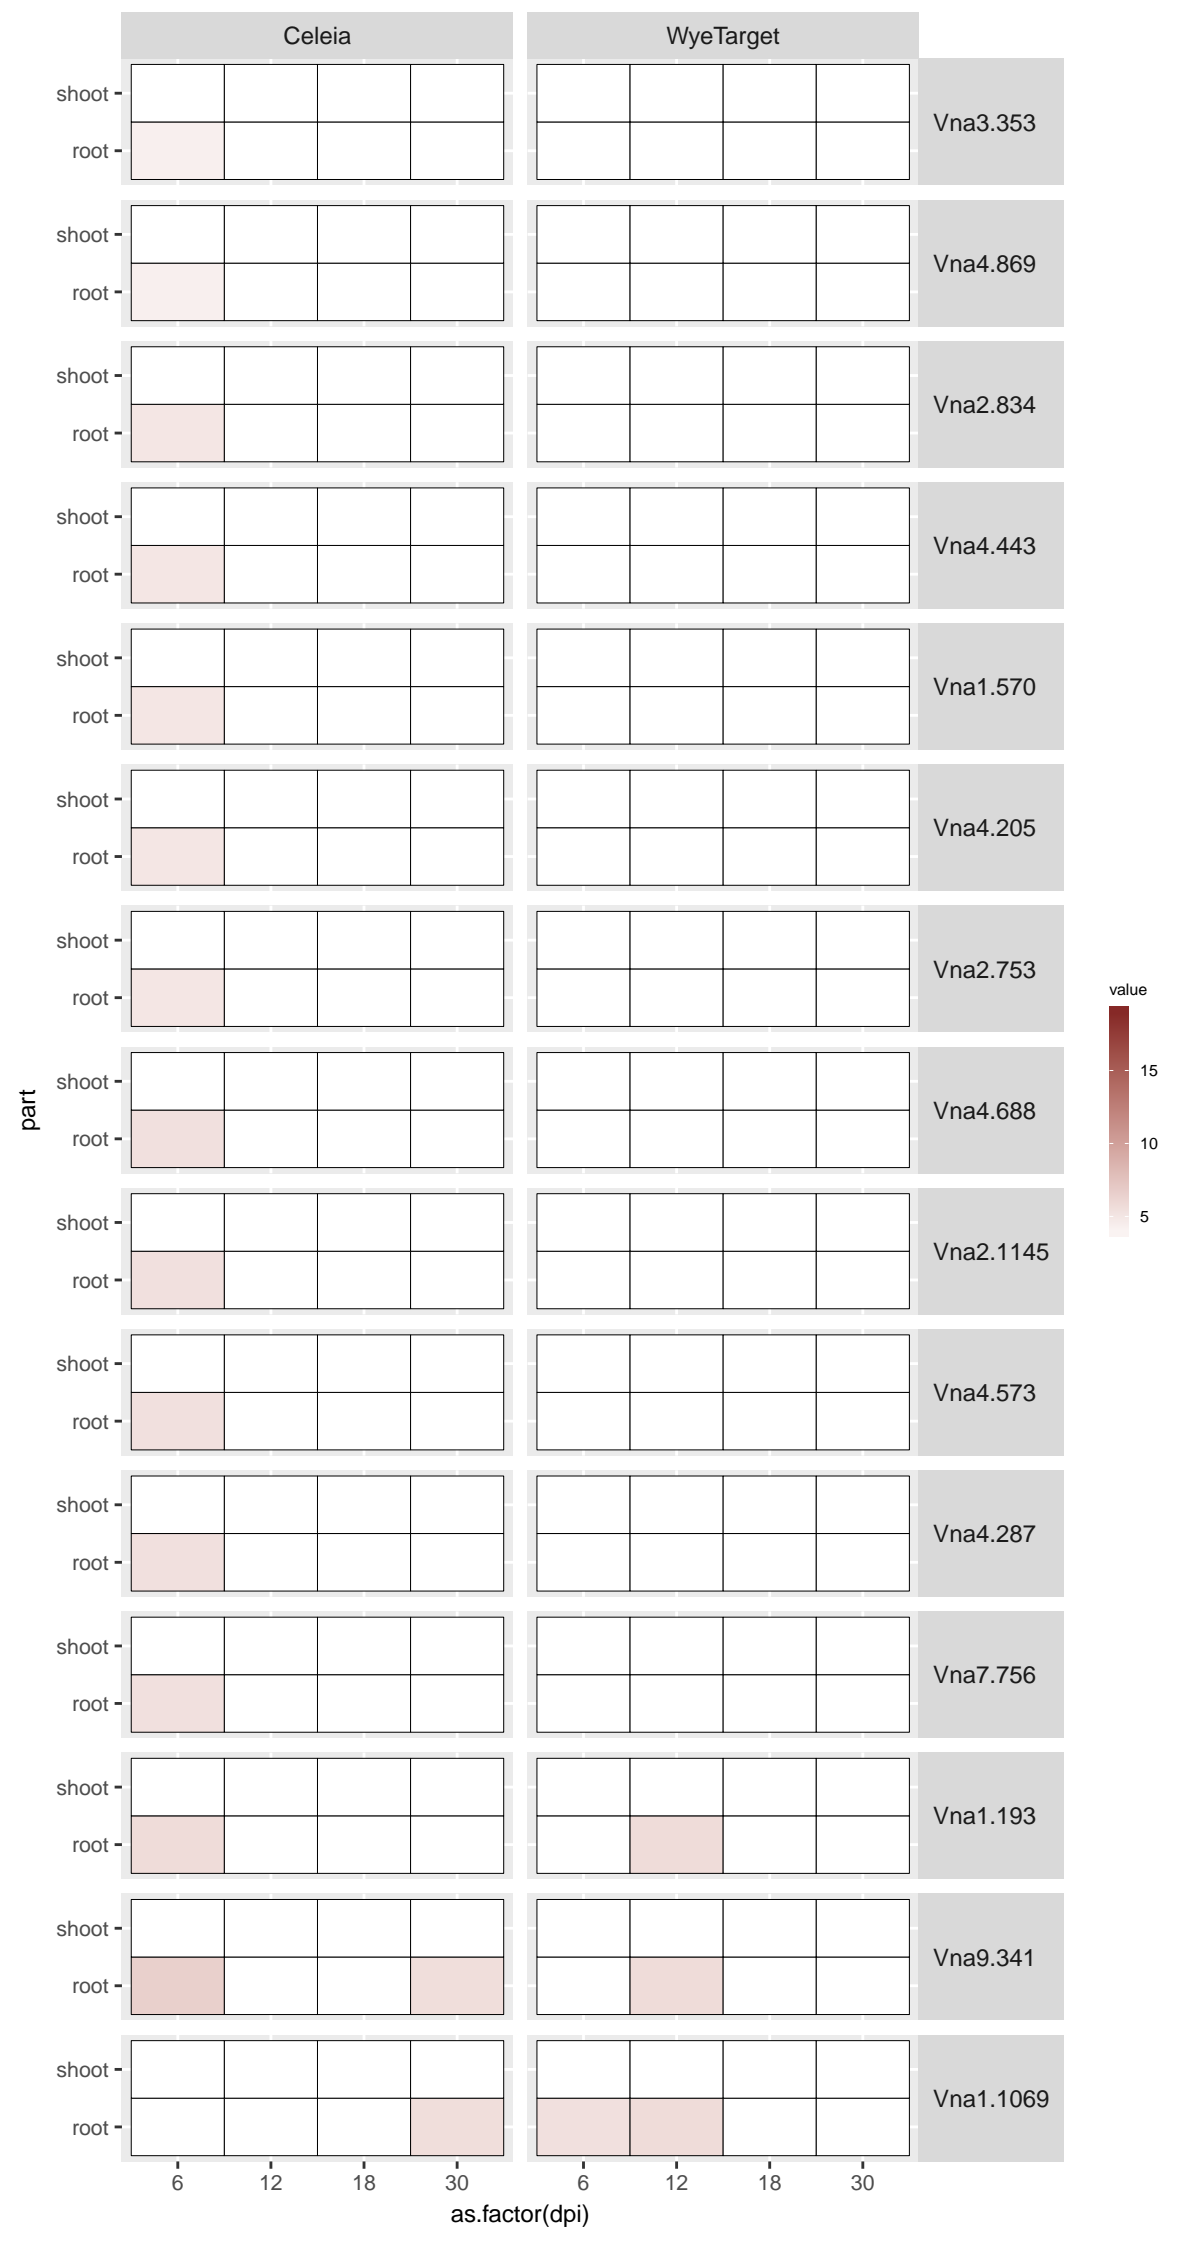

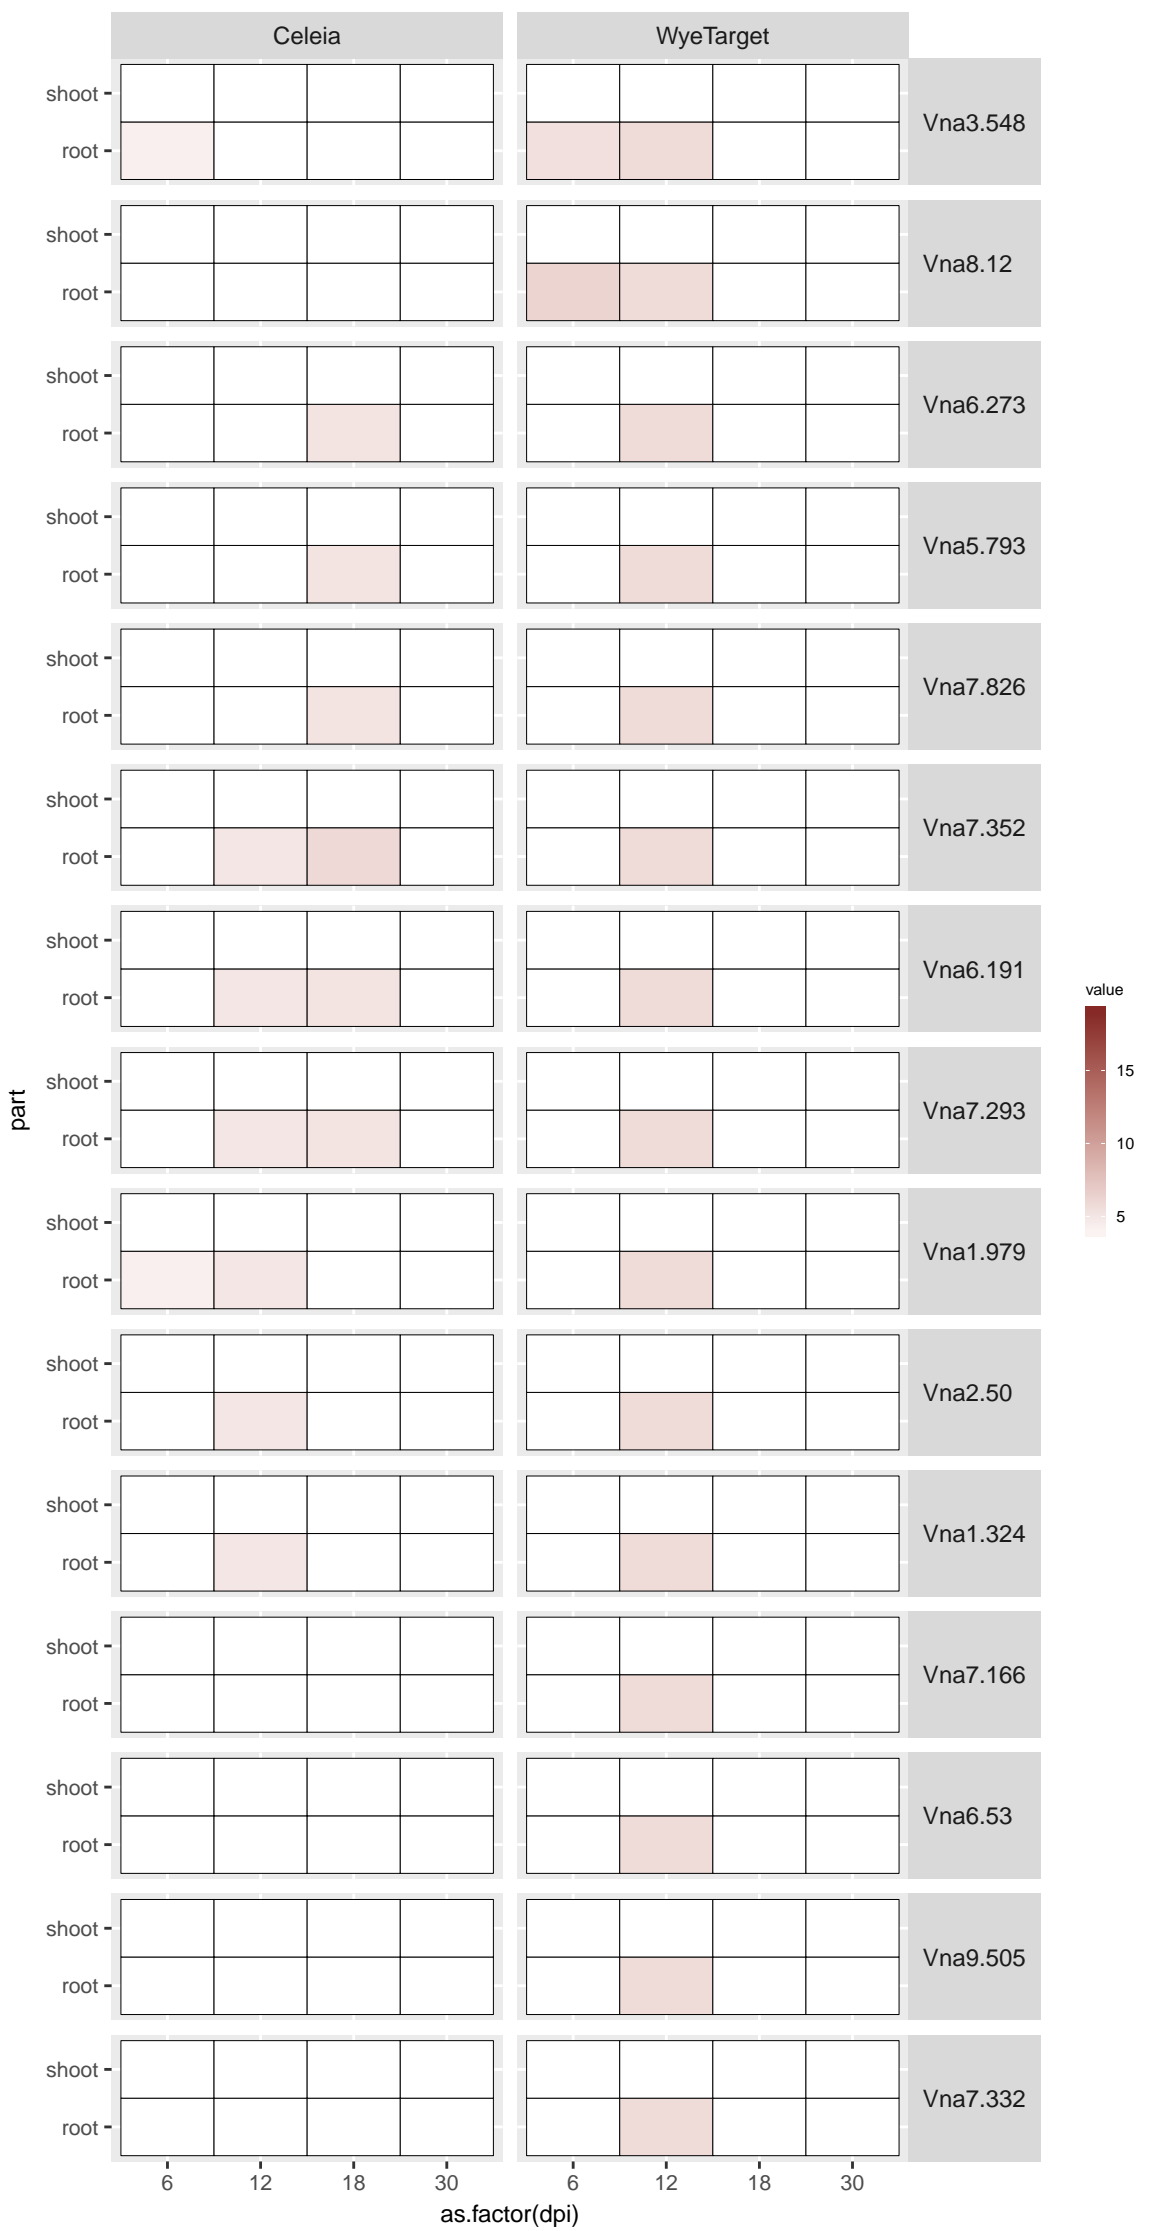

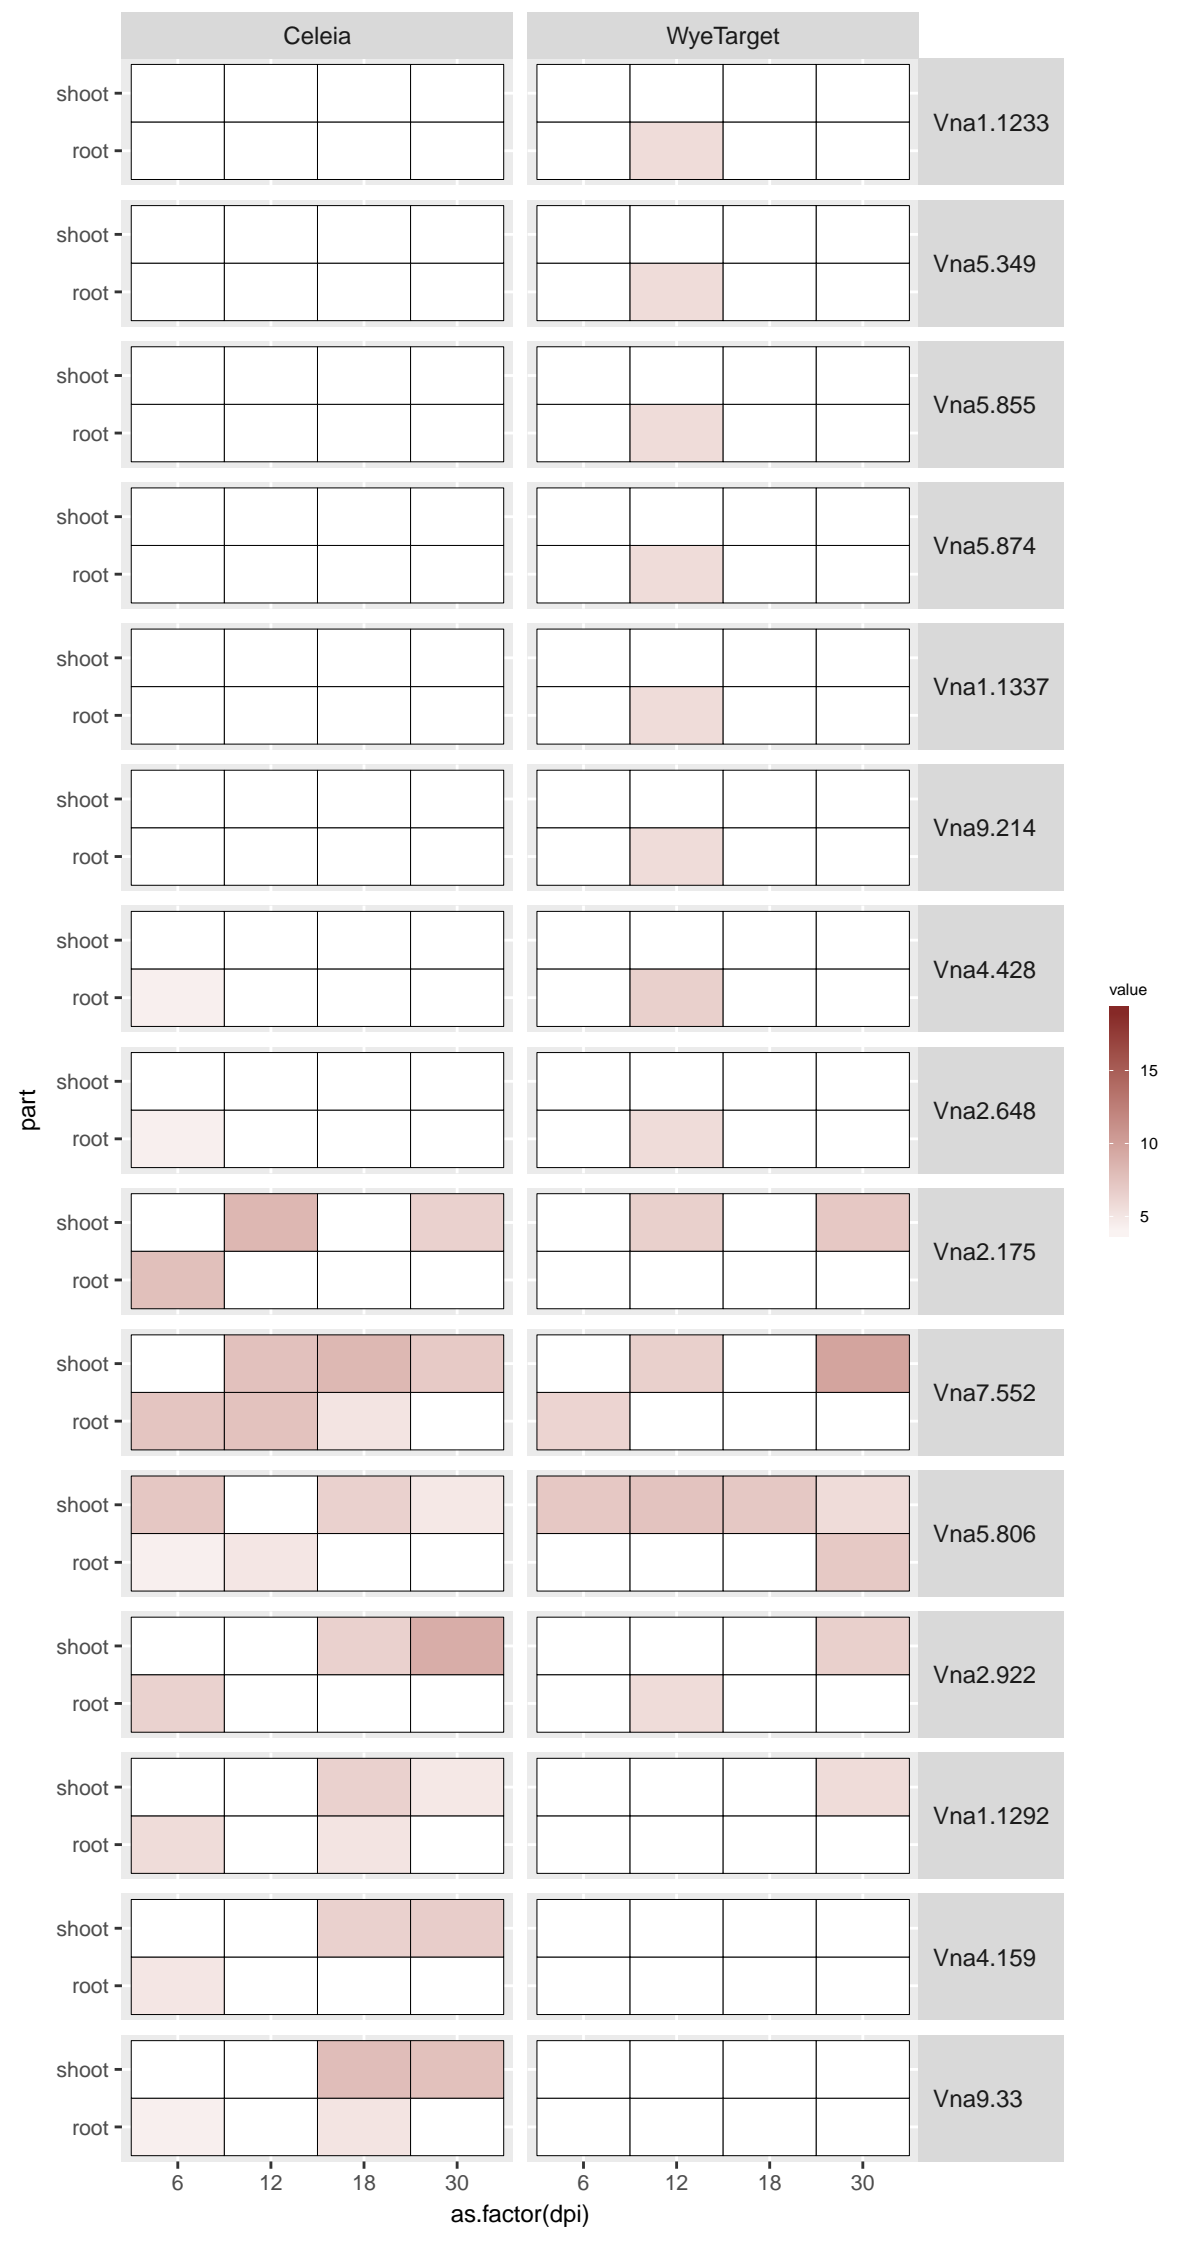

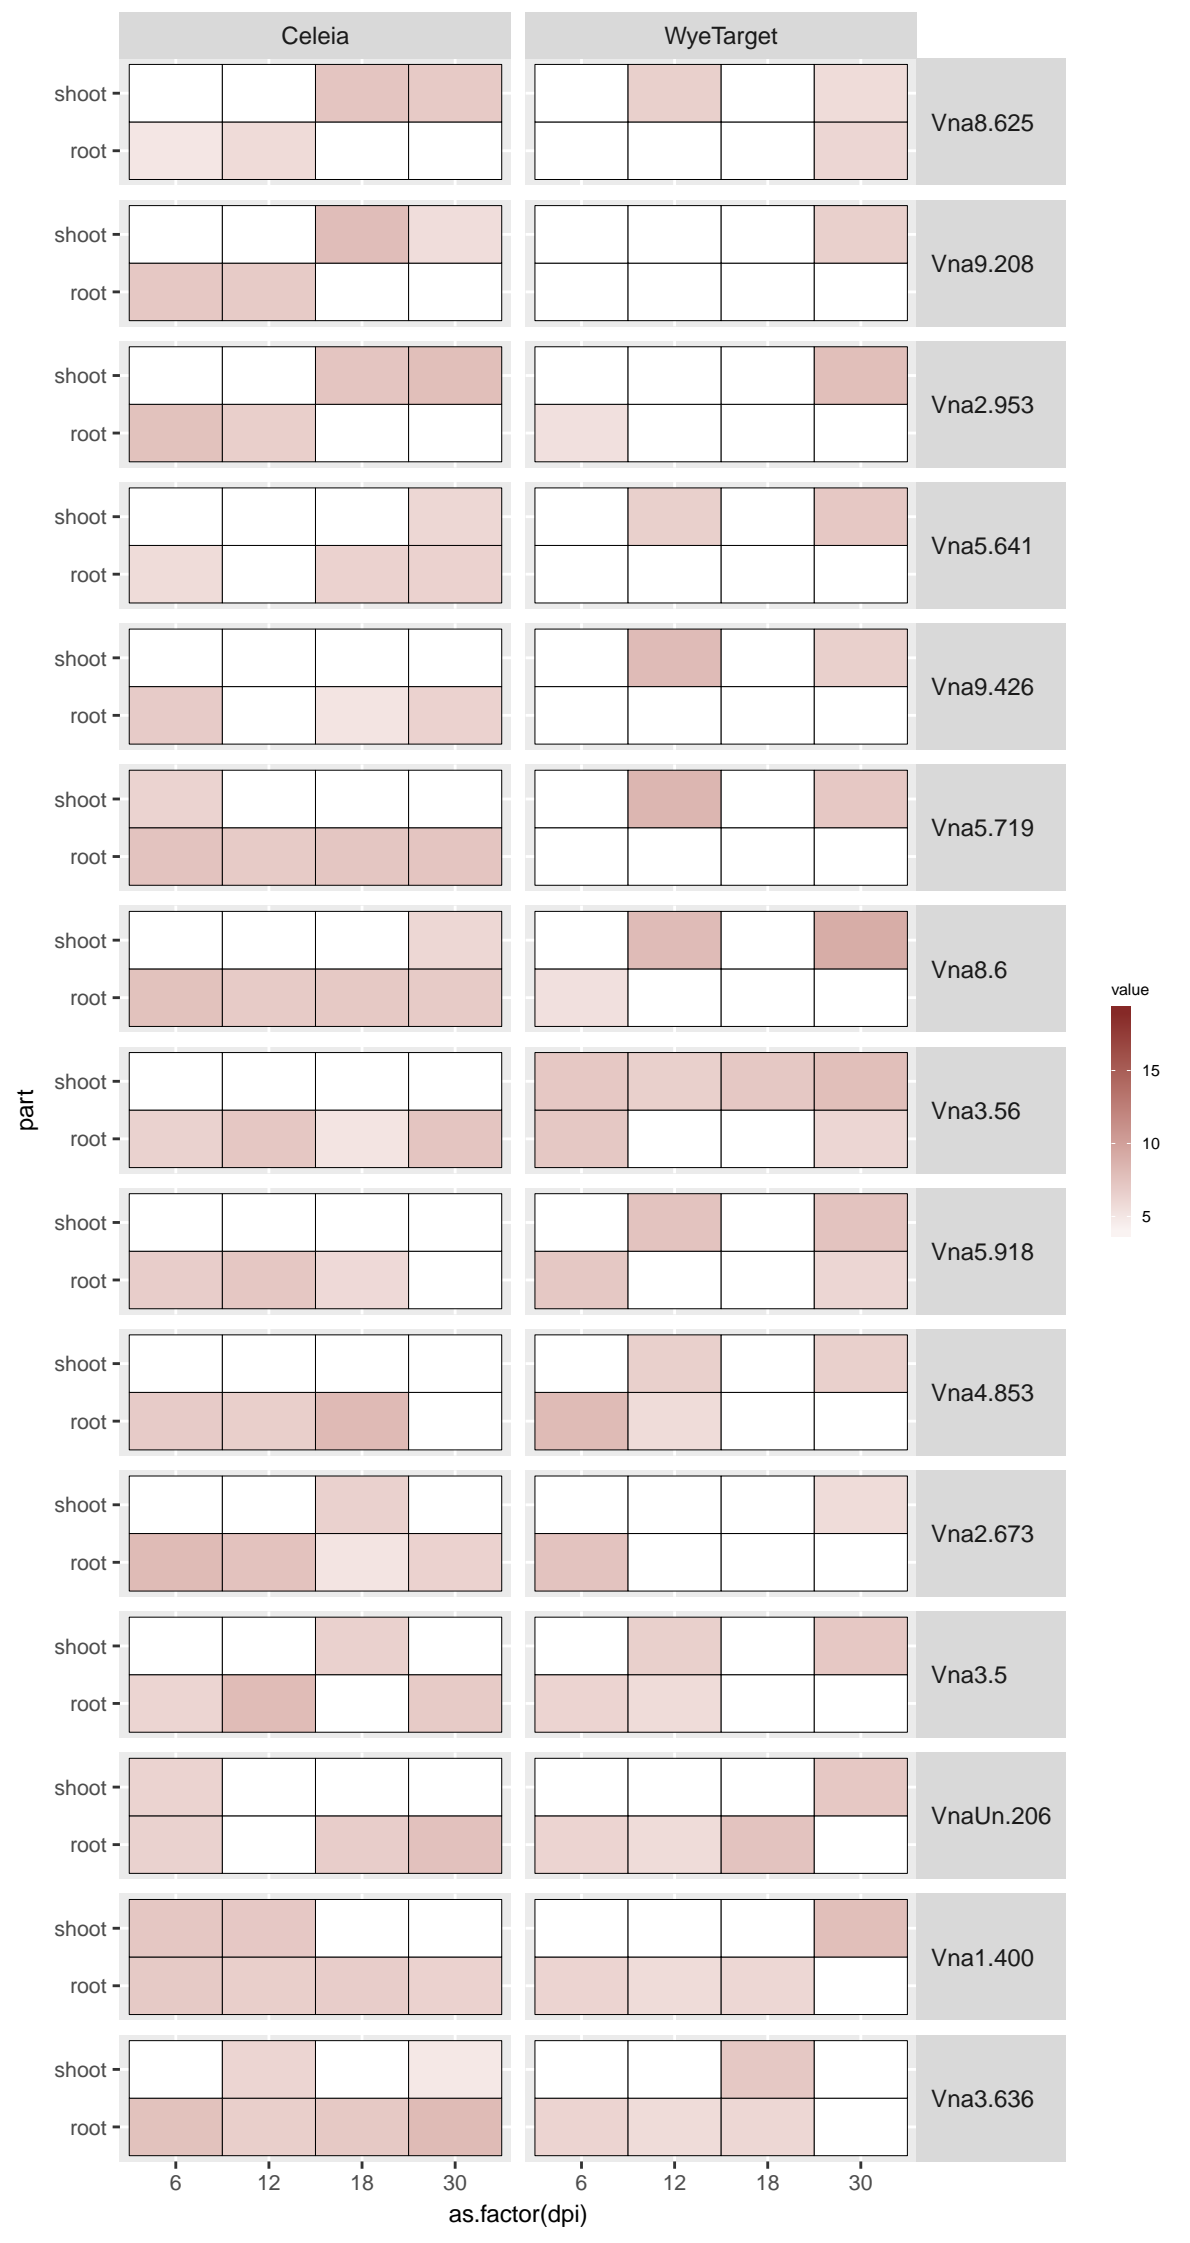

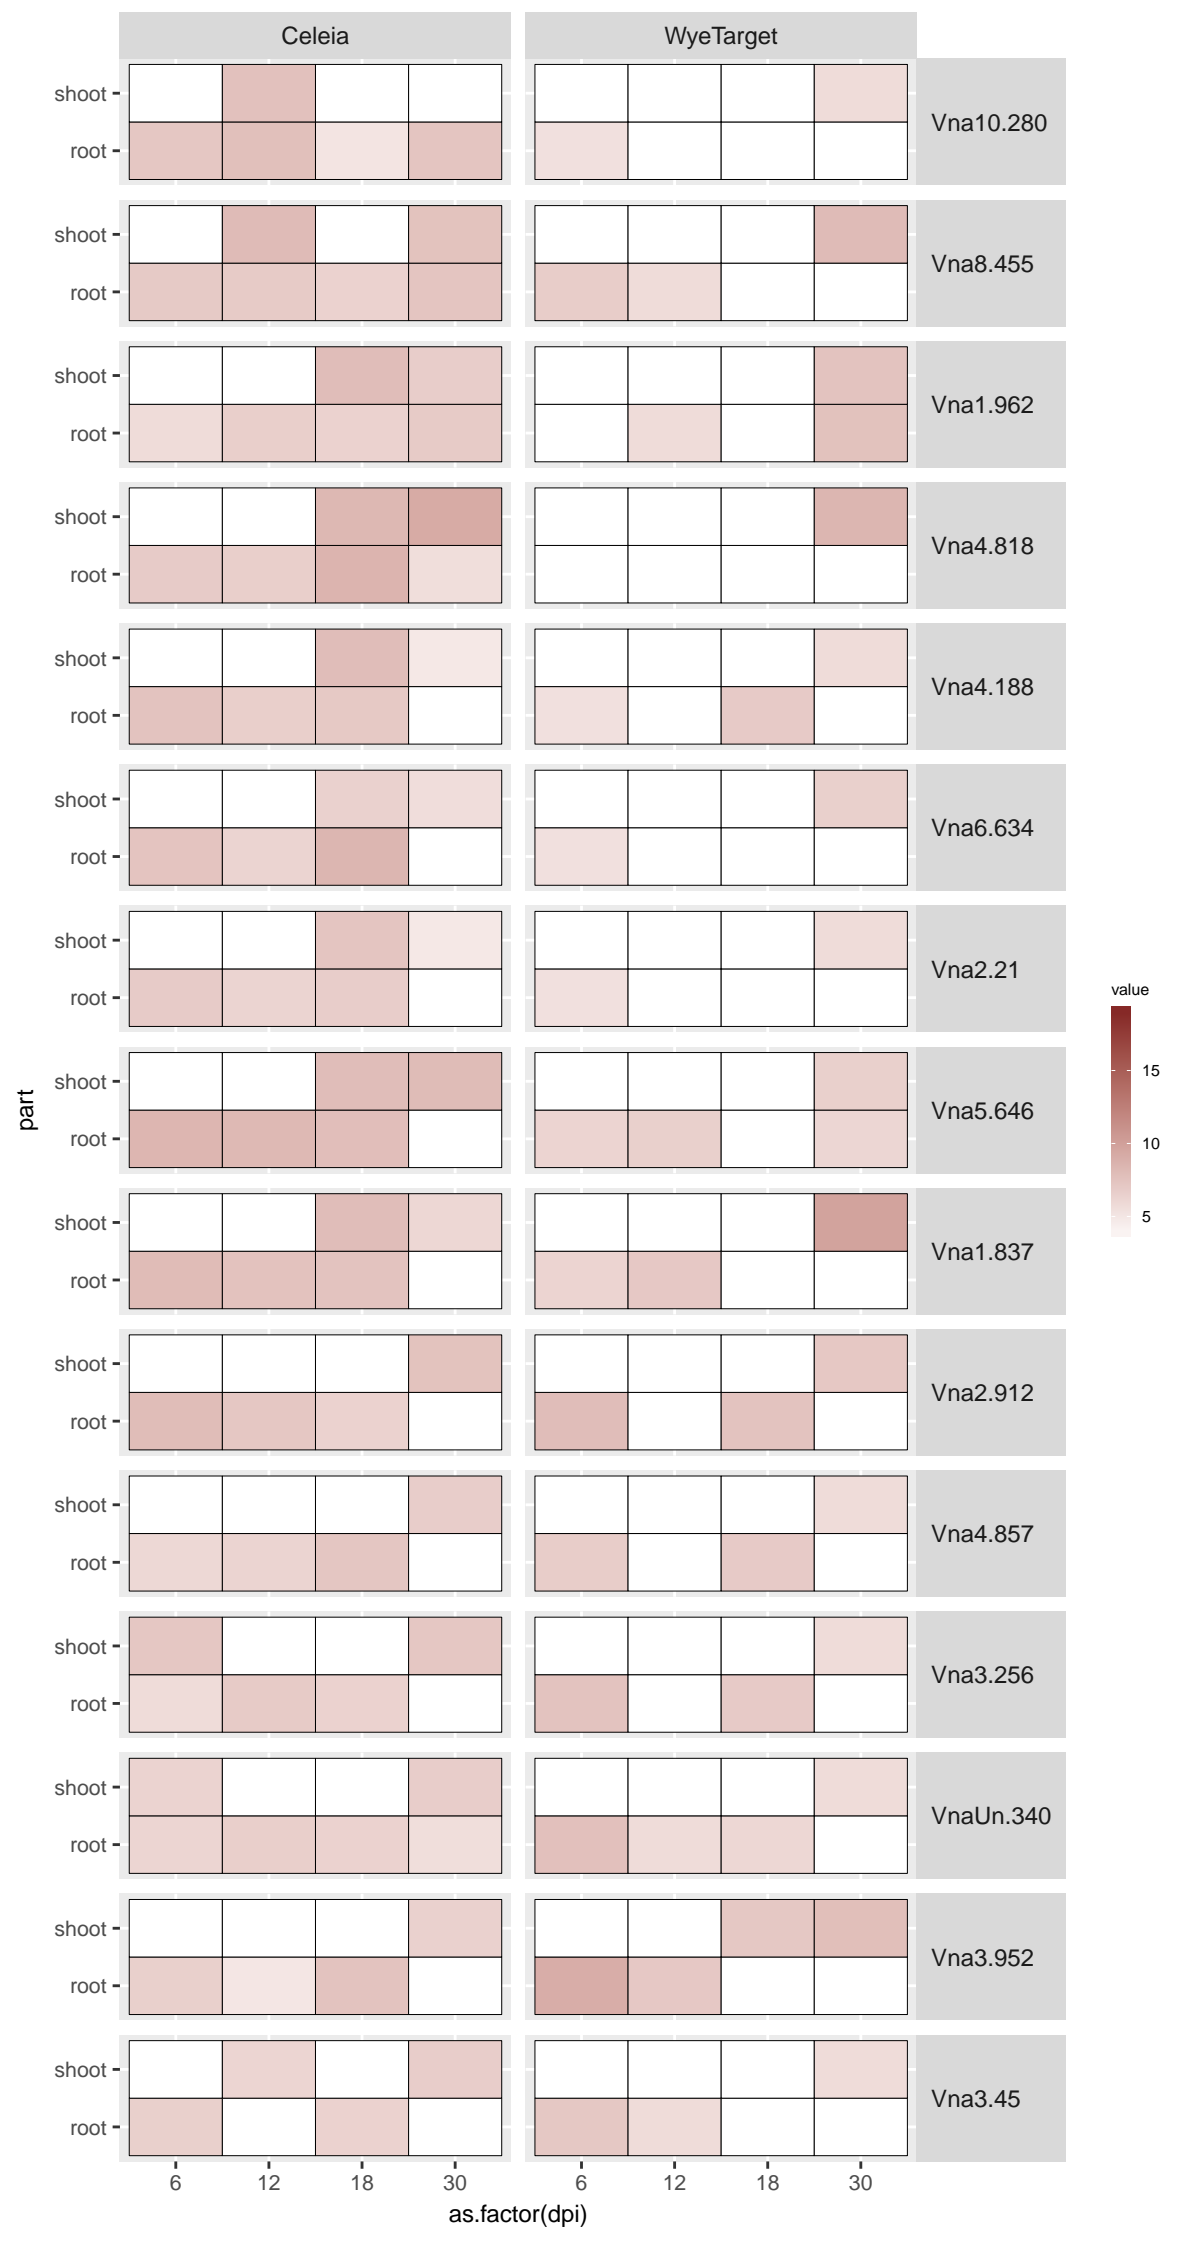

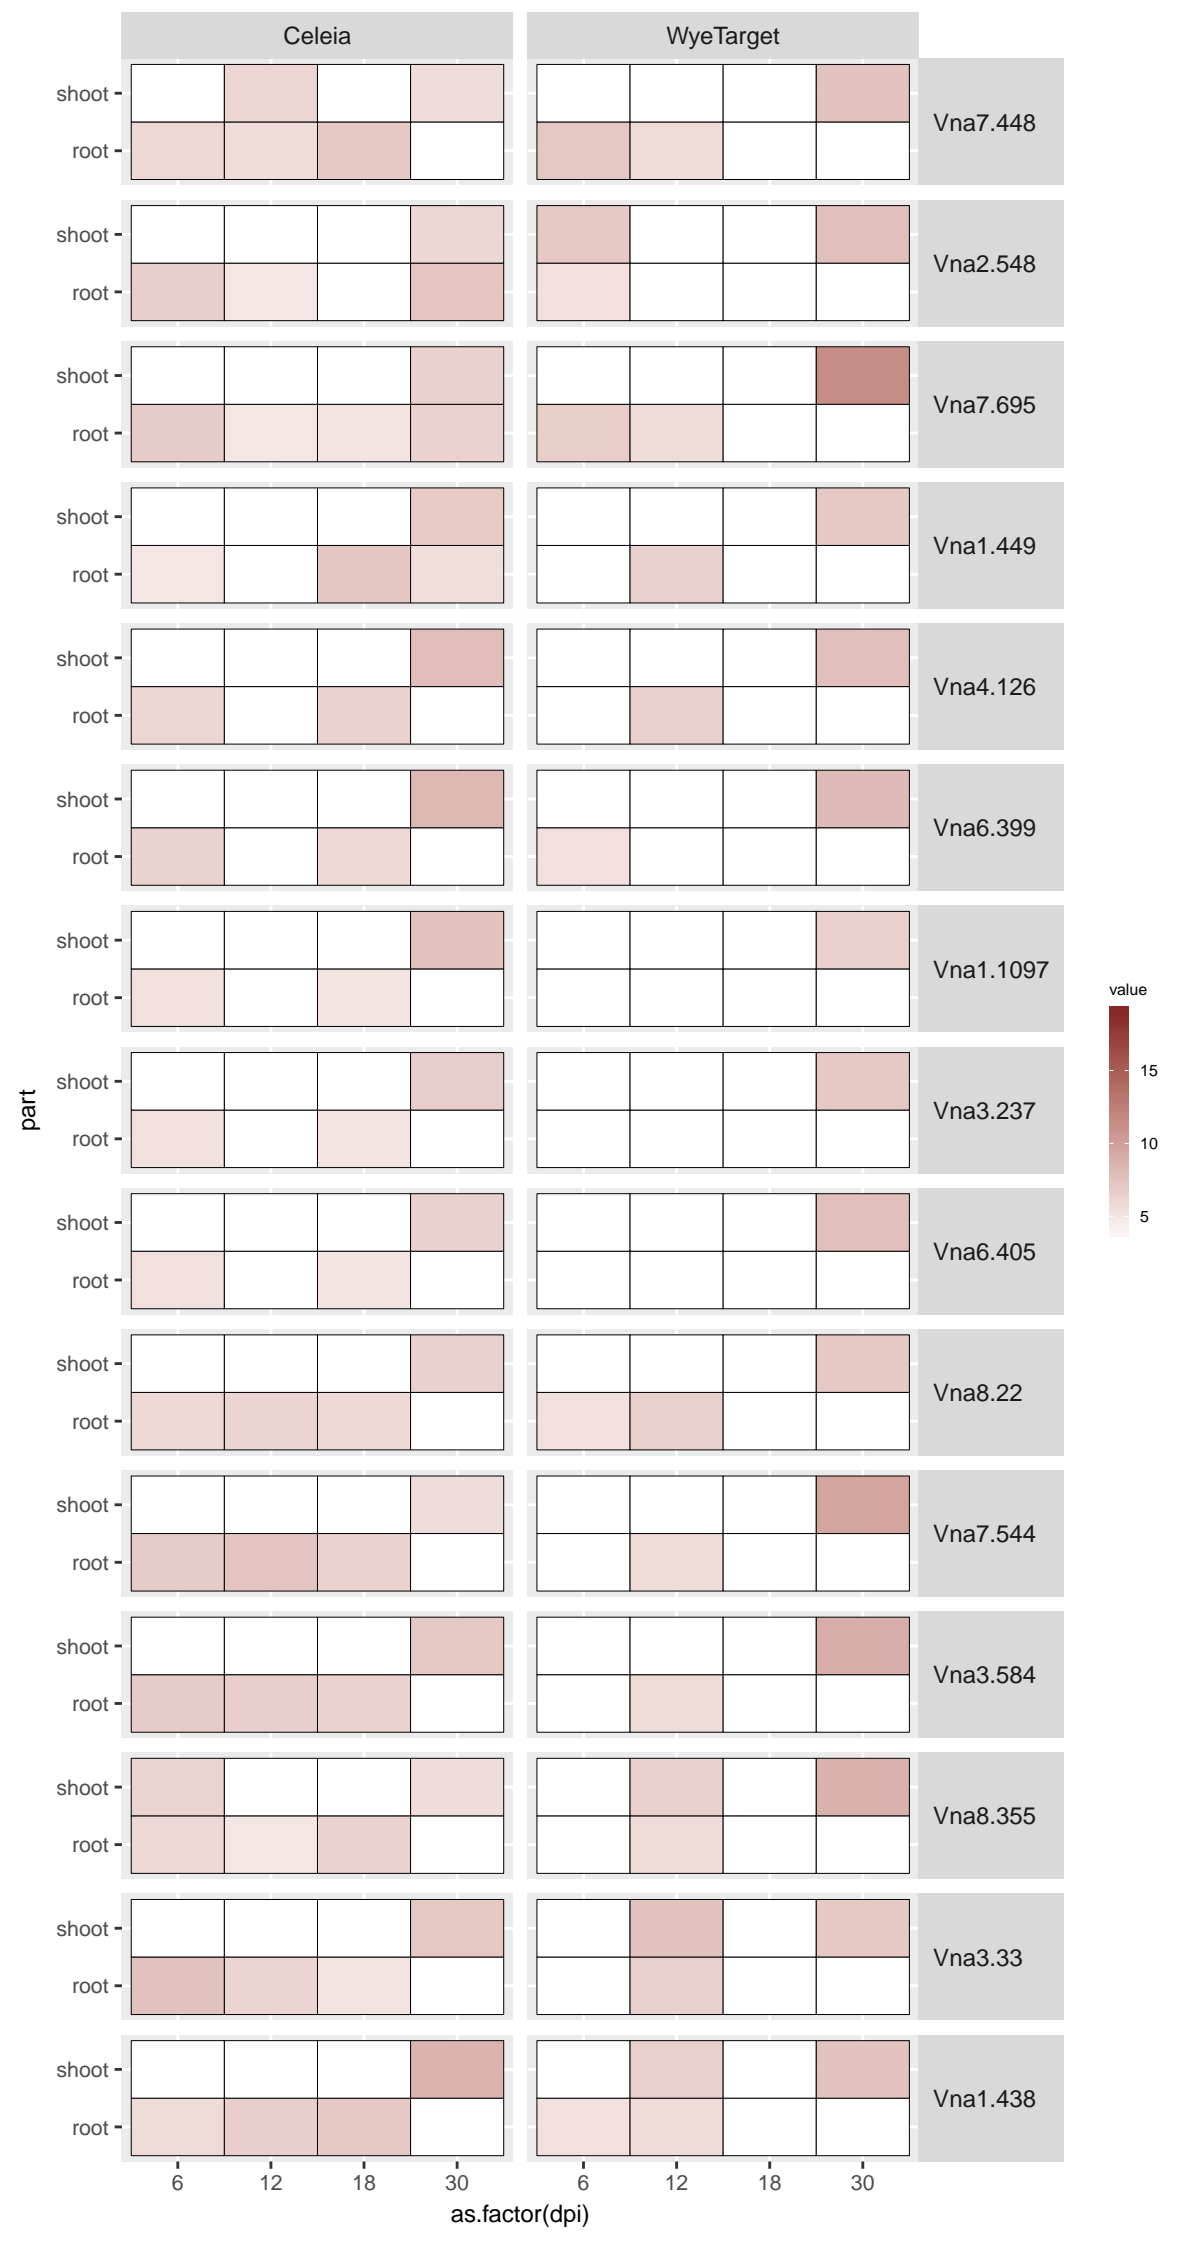



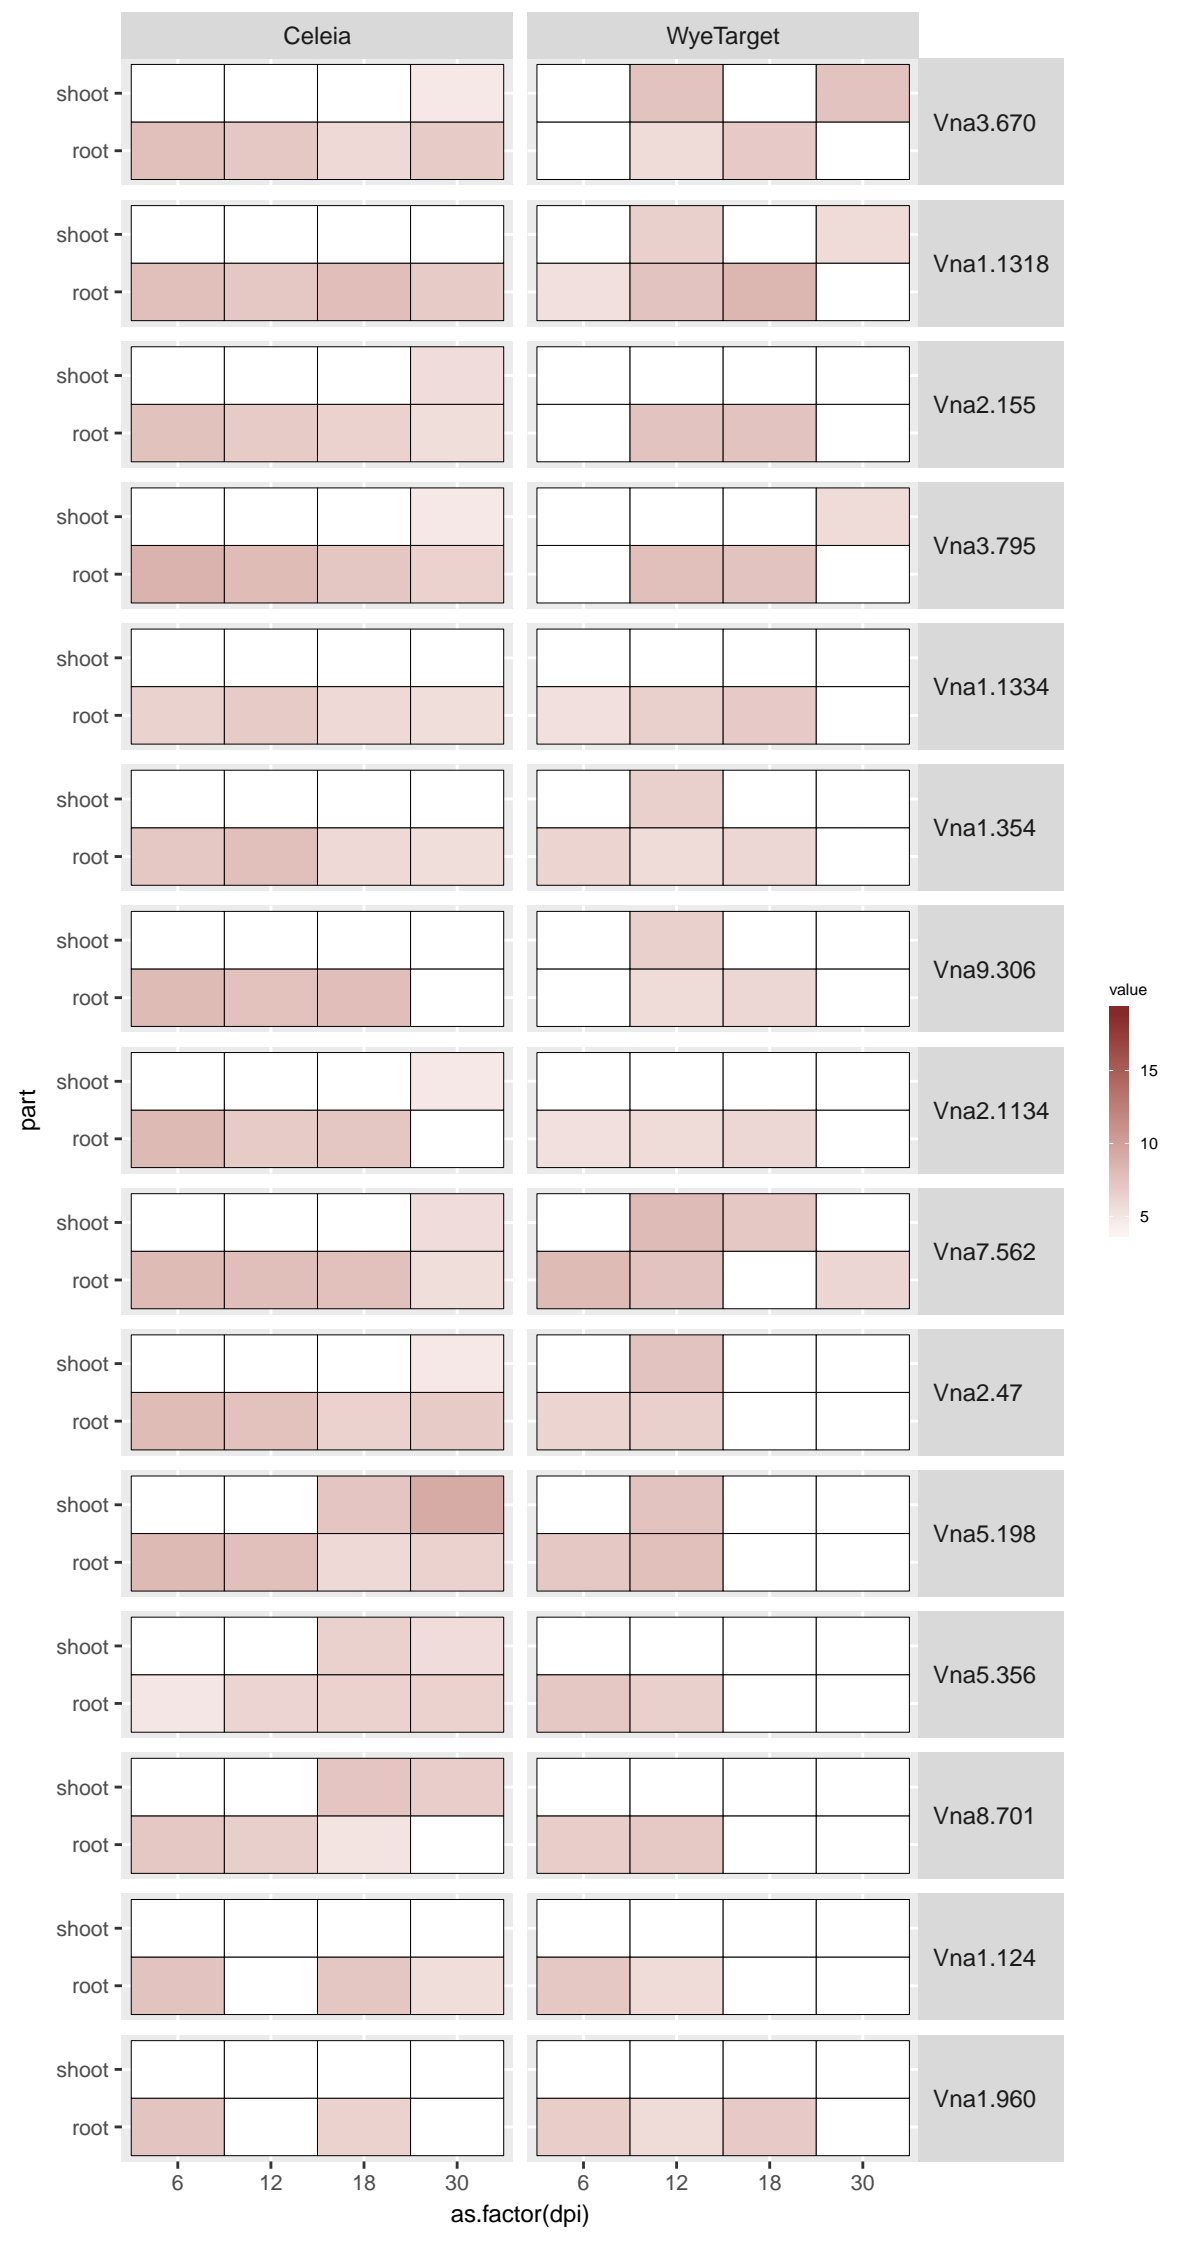

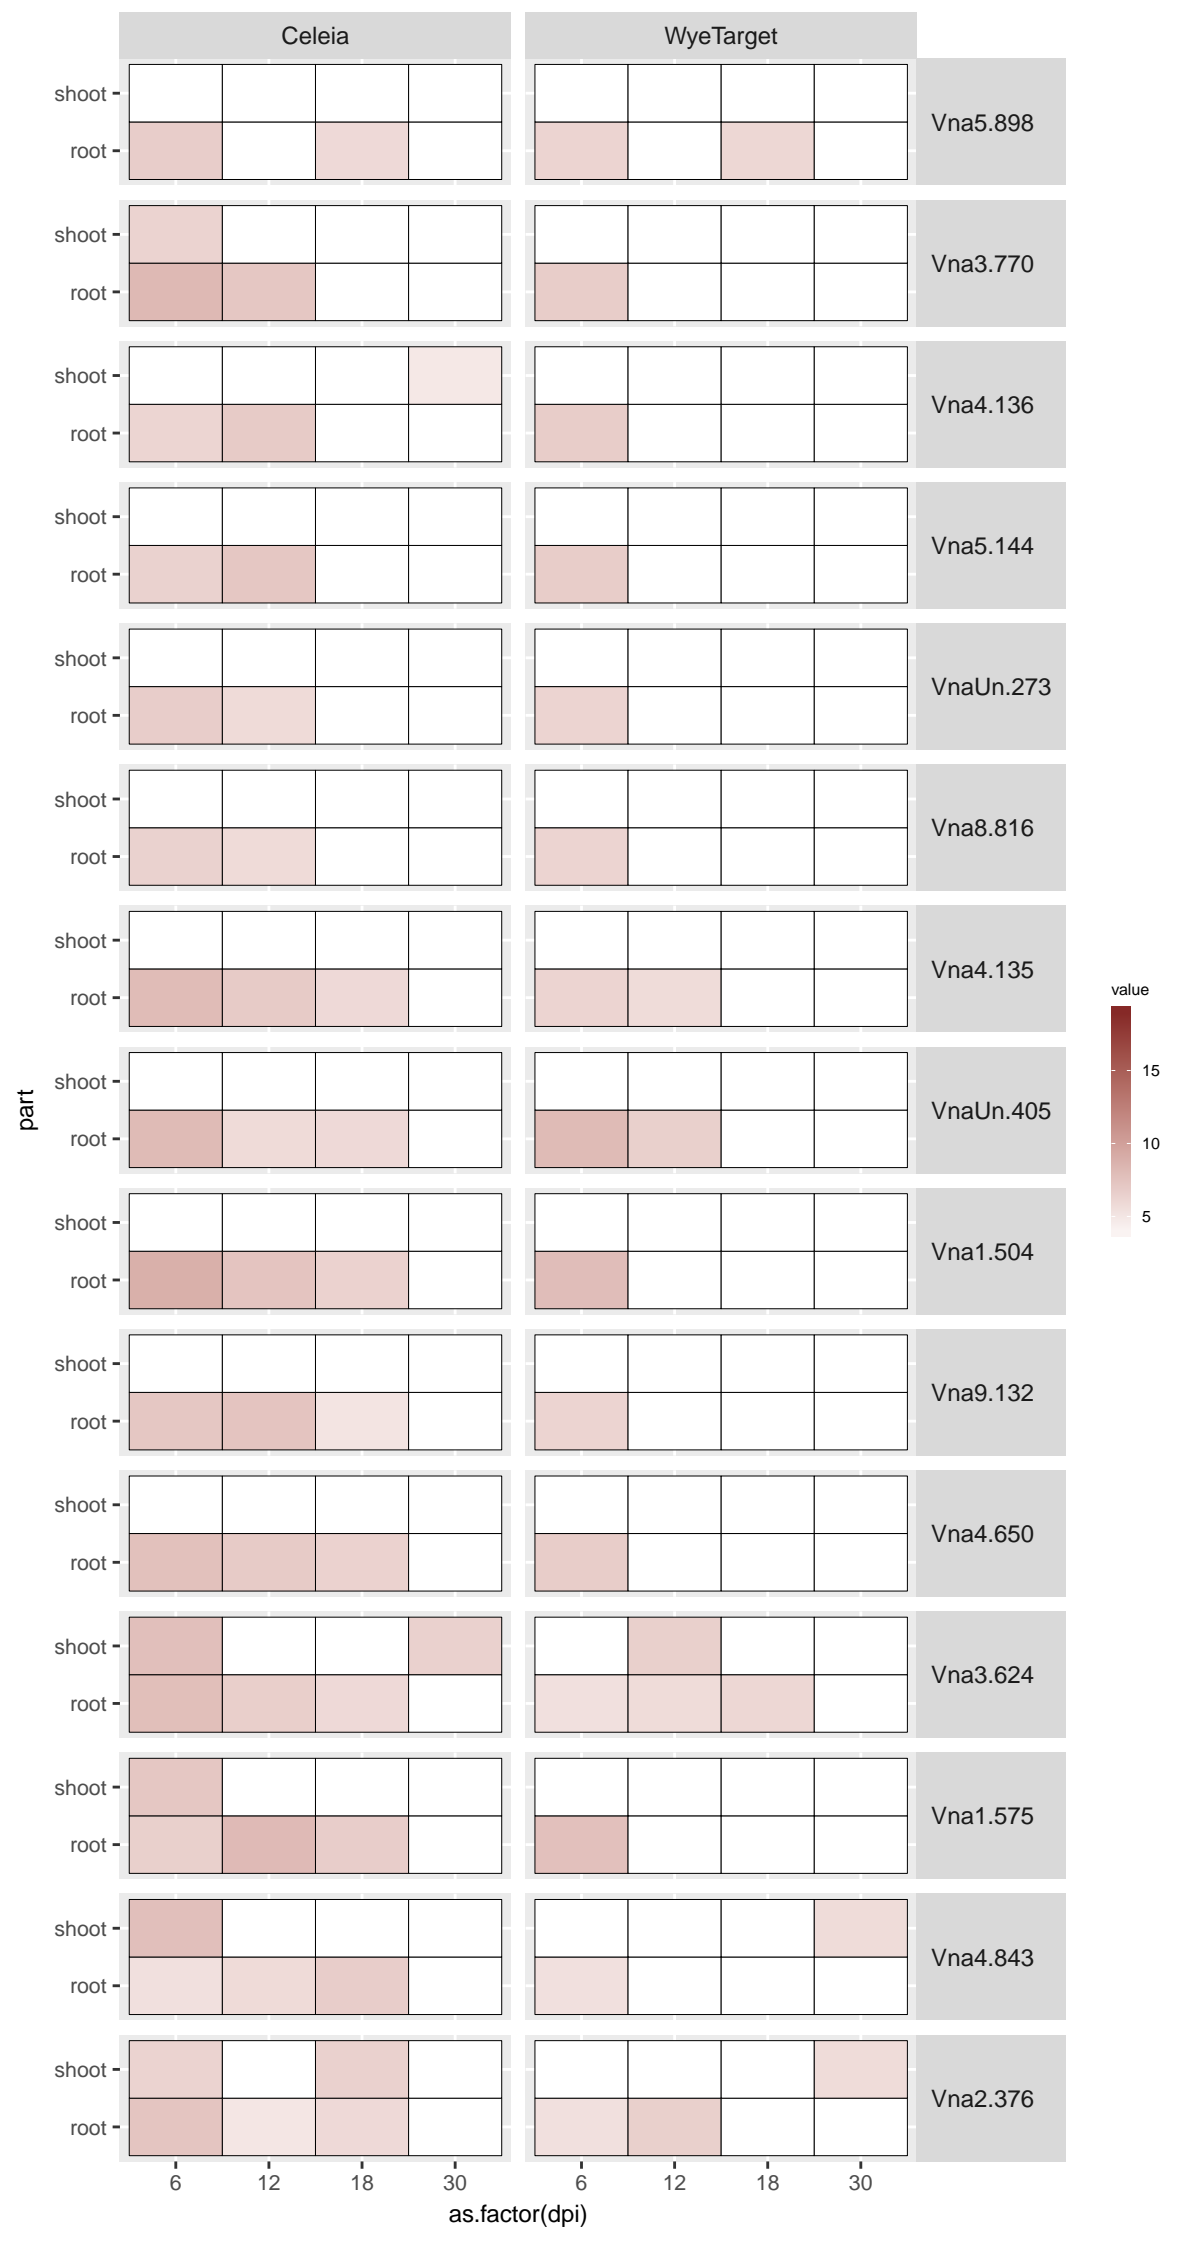

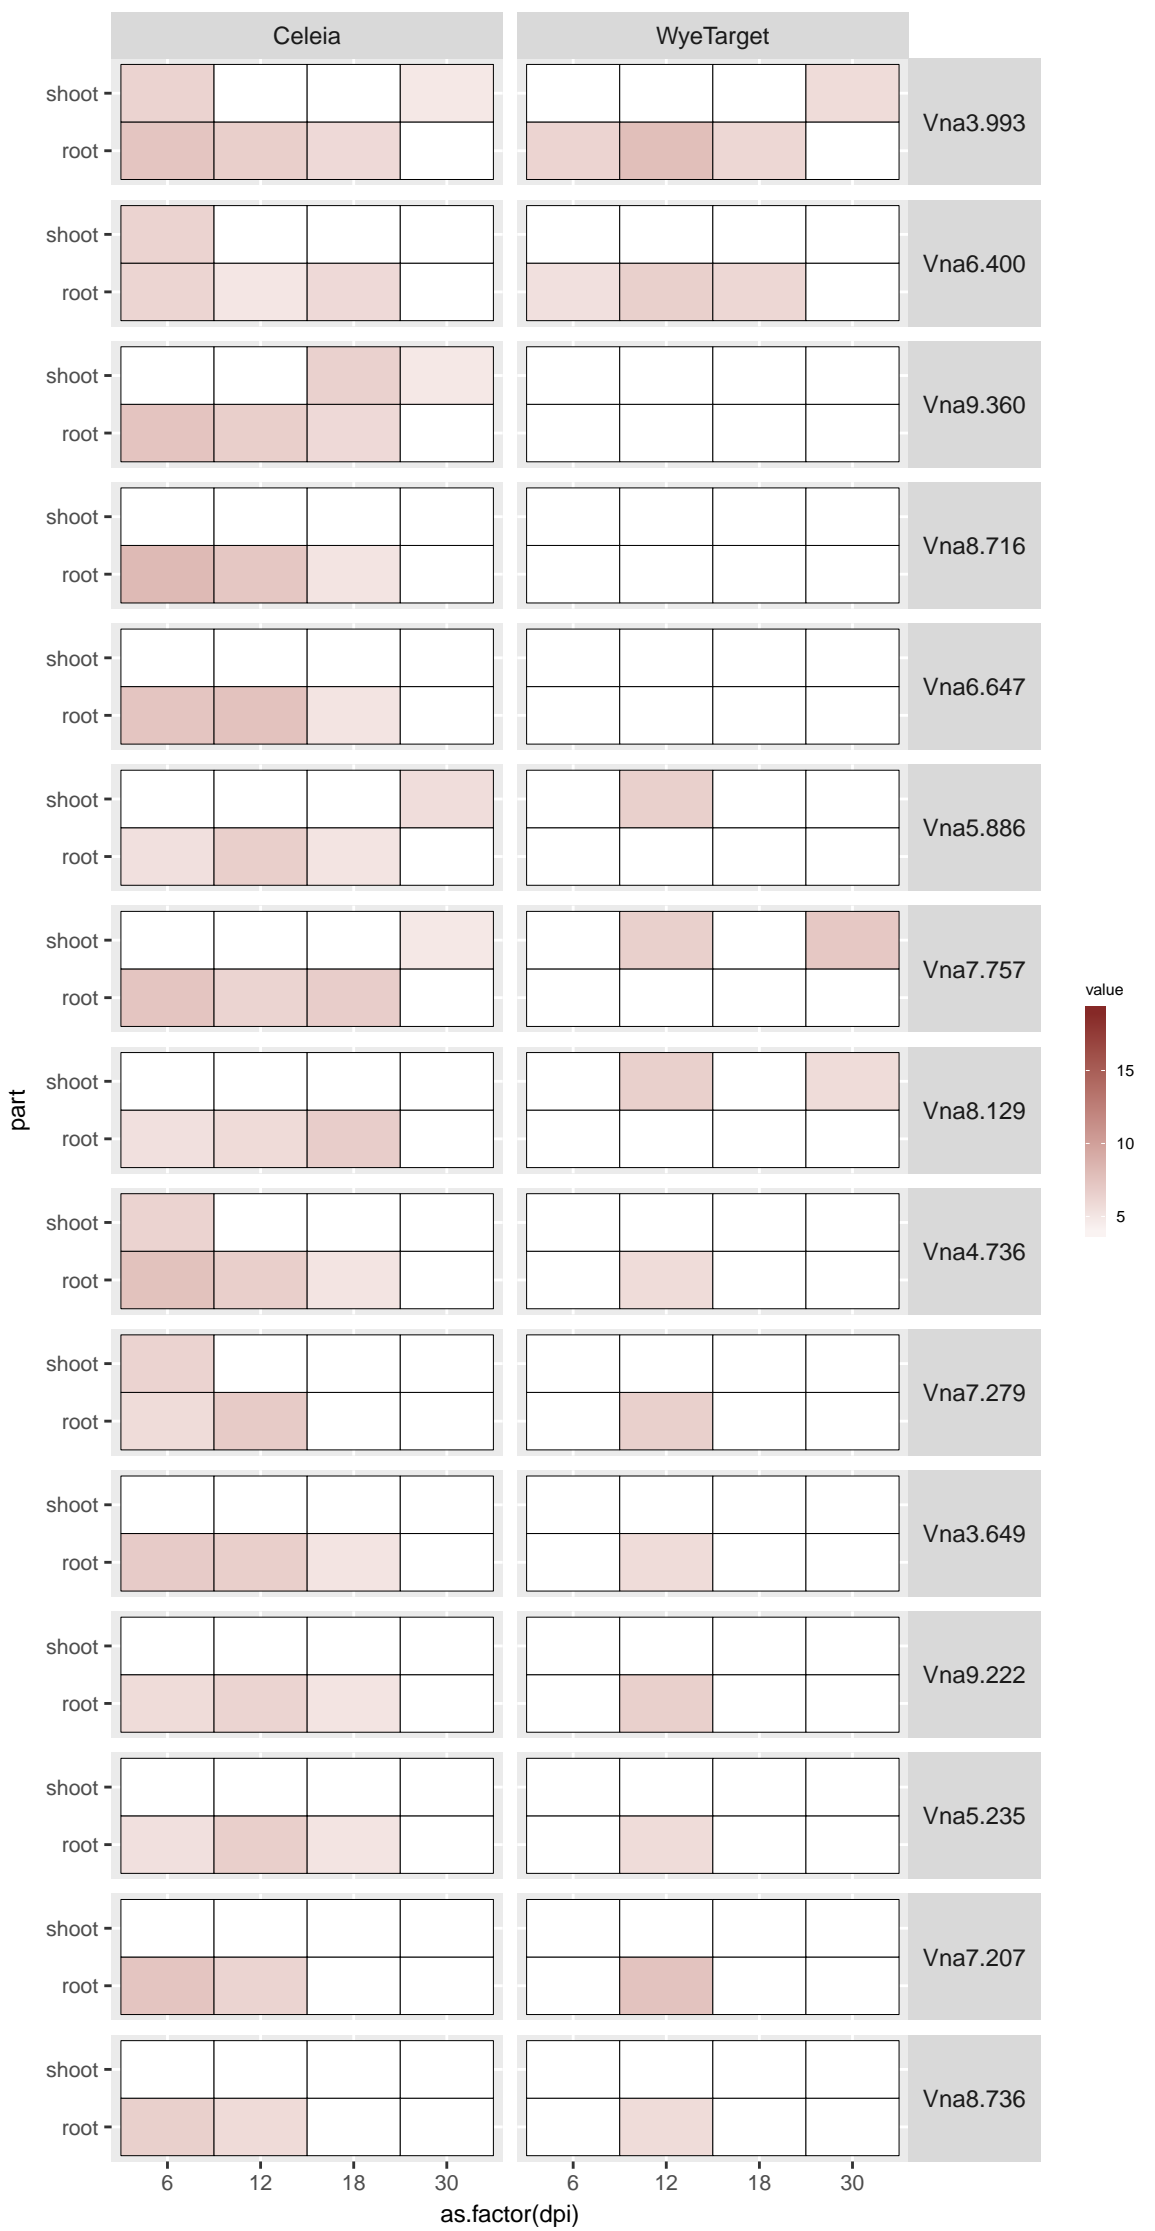

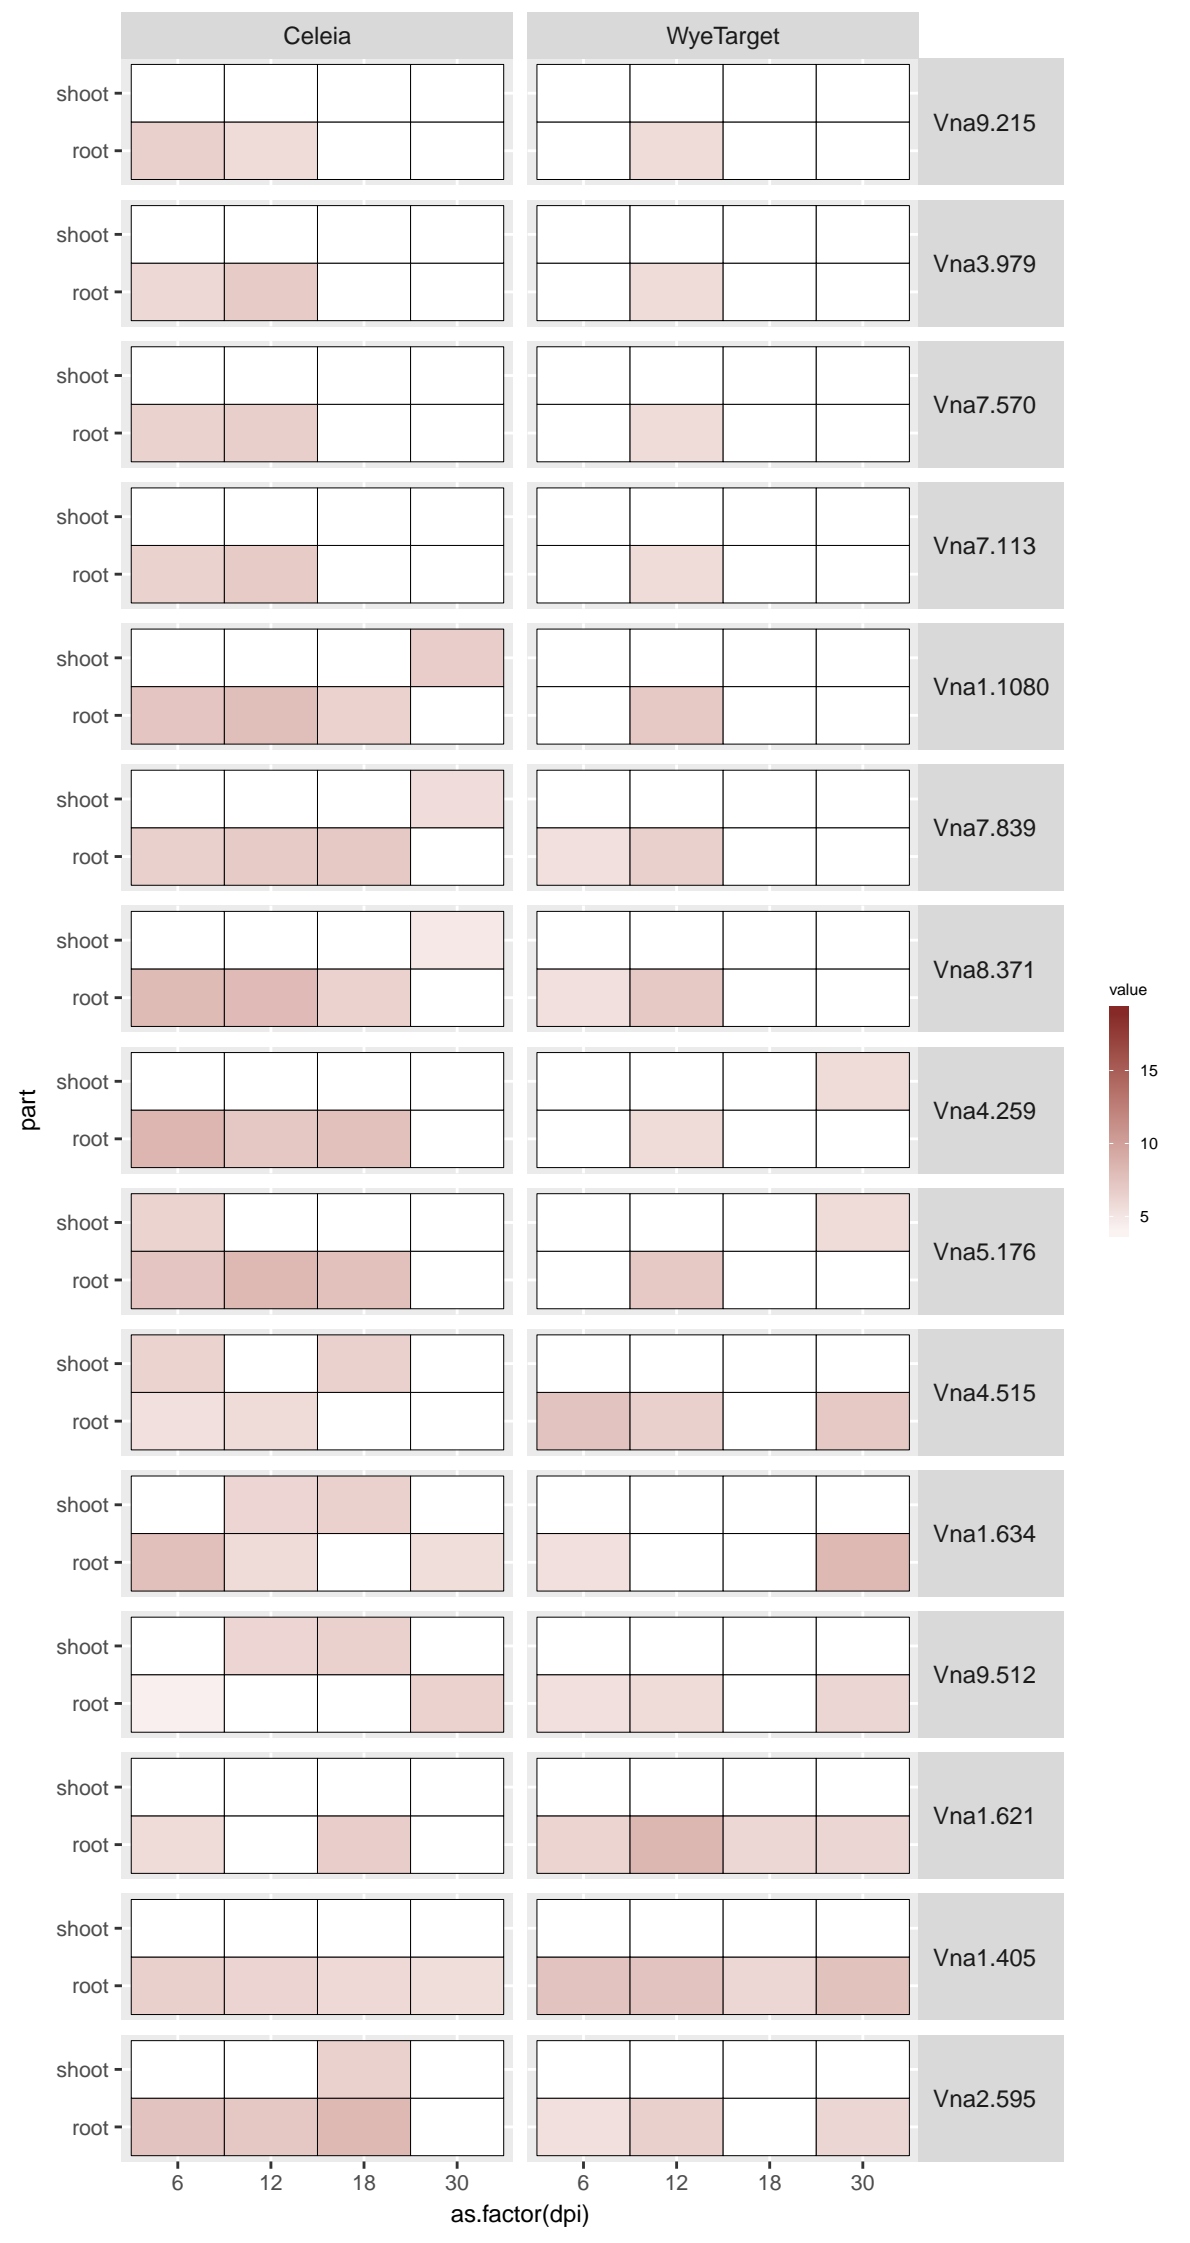

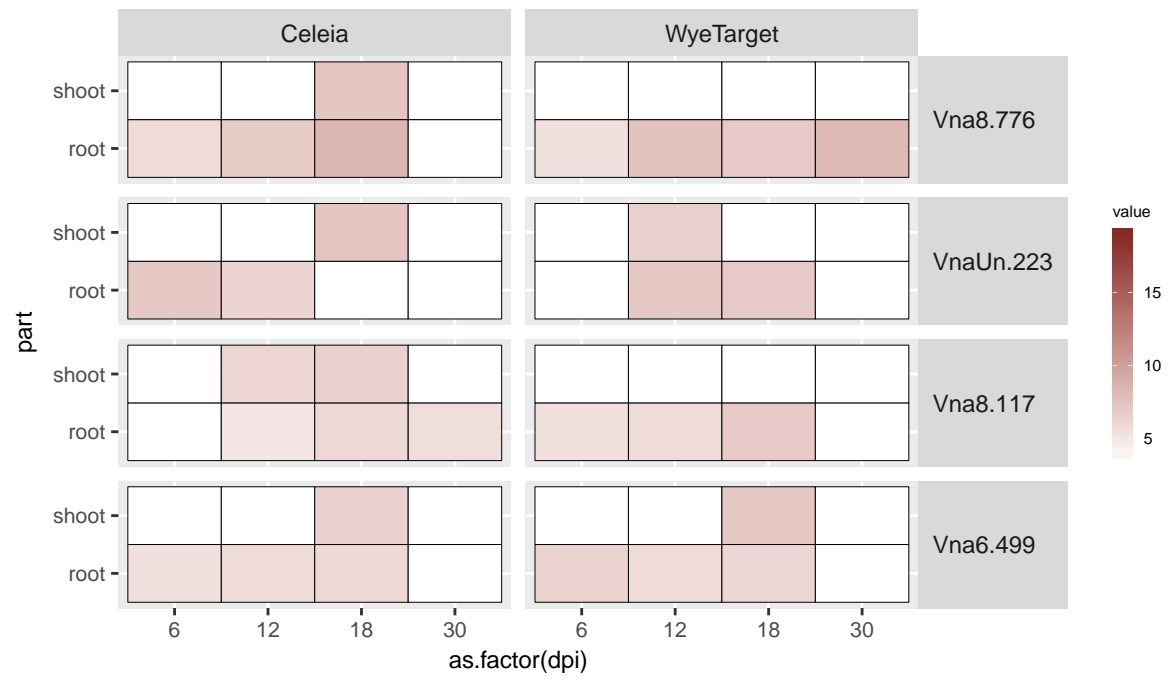

Supplement: pone.0198971.s010.pdf [file pone.0198971.s010.pdf]
