# Supplementary material for: Comprehensive analysis of Verticillium nonalfalfae in silico secretome uncovers putative effector proteins expressed during hop invasion
Source: PLoS One. 2018 Jun 12;13(6):e0198971. doi: 10.1371/journal.pone.0198971 (PMC5997321; doi:10.1371/journal.pone.0198971)
Supplement: S8 Table — a, oligonucleotide designed according to template [123]; b, oligonucleotide that amplifies the promoter region of the target gene; c, oligonucleotide that amplifies the terminator region of the target gene; d, oligonucleotide that amplifies the target gene for knockout (KO) selection; e, oligonucleotide that amplifies genomic and vector sequences for KO selection; f, V. nonalfalfae lethal pathotype-specific marker [97]. (XLSX) [file pone.0198971.s008.xlsx]

## Sheet: List1
S8 Table
Gene model name	Application	Primer pair	Sequence 5' – 3'
Vna4.761	RT-qPCR	CHR4.761-F	CAACGGCGATGCACACATTA
		CHR4.761-R	CGCAGCCTCCGGTGATC
Vna5.694	RT-qPCR	CHR5.694-F	CCTGGCGACTACACTCCTCCTA
		CHR5.694-R	CAGACCTGCCAGCCTTGCT
Vna7.443	RT-qPCR	CHR7.443-F	TGGCAGCTGGTATCCTGG
		CHR7.443-R	GTTCCCTTGCCCTCGTACTT
Vna8.691	RT-qPCR	CHR8.691-F	CCAAGGGAGGATACAGCACCTA
		CHR8.691-R	CCTCGCTGAGATCCTTCTTGTAC
VnaUn.279	RT-qPCR	UN.279-F	TTCCCATTACAGCCCTTTTCAC
		UN.279-R	CGGCCTCCATGGACAAGA
Vna8.801	RT-qPCR	SF-F	GCGCTCGAGACGATCAACCT
(splicing factor 3a2)		SF-R	AGGTACGAGCCGTCGTTCTG
VnaUn.148	RT-qPCR	Top-F	GCATGGTTTTTCGGATCCAT
(DNA topoisomerase)		Top-R	TACCTCGCGGAAATCCTCAA
Vna5.694	KOb	5.694-O1-Fa	GGTCTTAAUACACATCTGCGAGCACTGAG
		5.694-O2-Ra	GGCATTAAUTTGTTGGCGTGTGTGAAGAT
	KOc	5.694-A3-Fa	GGACTTAAUATAAGTGGCAAGGCGGTTTT
		5.694-A4-Ra	GGGTTTAAUGTTGTCTCGAGCCGTTTGTT
	KOd	5.694-T1-Fa	ATGCAGTTCCTCACTCTCCT
		5.694-T2-Ra	CTAAATGCAGTAGGGGCTCT
	KOe	5.694-T4-Fa	GGGAAAAGCGGCAGATATTA
		RF-2	TCTCCTTGCATGCACCATTCCTTG
	KOe	5.694-T3-Fa	AGGTGGTTGTGGAAGTCTGG
		RF-1	AAATTTTGTGCTCACCGCCTGGAC
Vna7.443	KOb	7.443-O1-Fa	GGTCTTAAUCACGAGCCTCTCTCTGTGTG
		7.443-O2-Ra	GGCATTAAUTGGTGTTGGGTTGGGTAGAT
	KOc	7.443-A3-Fa	GGACTTAAUGGTTCCTCCTCCATCCTCTT
		7.443-A4-Ra	GGGTTTAAUCCCTACATTTGCCTTGCATT
	KOd	7.443-T1-Fa	ATGCGCTACTCCCTTACTCTC
		7.443-T2-Ra	TCACTGCTCAGGGTGCCACTT
	KOe	7.443-T4-Fa	CATTGTCGAGGCTGGCTATT
		RF-2	TCTCCTTGCATGCACCATTCCTTG
	KOe	7.443-T3-Fa	CACTCAGCATCCGTGACAGT
		RF-1	AAATTTTGTGCTCACCGCCTGGAC
Vna8.691	KOb	8.691-O1-Fa	GGTCTTAAUAGATTGAGGGGAAACCCTGT
		8.691-O2-Ra	GGCATTAAUCATCGCCTCAAGAAGTCCTC
	KOc	8.691-A3-Fa	GGACTTAAUGCGTTGATCAATGGTCATGT
		8.691-A4-Ra	GGGTTTAAUCTGAGACTTCTCCGCCTCAC
	KOd	8.691-T1-Fa	ATGGGAGACCAACGAACA
		8.691-T2-Ra	CTATTCCTCGGCATCCTG
	KOe	8.691-T4-Fa	GGACCATGCCGAGACATAAC
		RF-2	TCTCCTTGCATGCACCATTCCTTG
	KOe	8.691-T3-Fa	CACTCGATCCTGCAACAAAG
		RF-1	AAATTTTGTGCTCACCGCCTGGAC
VnaUn.279	KOb	UN.279-O1-Fa	GGTCTTAAUAGTTGTGTAACGGCCCTAGC
		UN.279-O2-Ra	GGCATTAAUTCACGCCTTTAGGAATTATCC
	KOc	UN.279-A3-Fa	GGACTTAAUTGGATTGAGGTTTCCGACAT
		UN.279-A4-Ra	GGGTTTAAUTACGCCATCATCCAAGACAG
	KOd	UN.279-T1-Fa	GCAGAGCAGGAGGATACGTC
		UN.279-T2-Ra	GAATGCTGCCAGAAGTGTCA
	KOe	UN.279-T4-Fa	GCAGAGCAGGAGGATACGTC
		RF-2	TCTCCTTGCATGCACCATTCCTTG
	KOe	RF-1	AAATTTTGTGCTCACCGCCTGGAC
		UN.279-T3-Ra	GAATGCTGCCAGAAGTGTCA
AFLP-9-1f	fungal biomass quantification	9-1gs-F	GGTAACGTCATCGAACGACATC
		9-1gs-R	CACACGCTACATATCAAACAGCATAT
